# Supplementary material for: Primary amine C–N bond cleavage for the synthesis of multi-substituted pyridine and pyrrole derivatives
Source: Royal Society of Chemistry journal article supplement (doi:10.1039/d2qo01789j), 2022-12-09

## Supporting Information

### **C–N bond cleavage of primary amine for the synthesis of multi-substituted pyridine and pyrrole derivatives**

Ruiqin Zhang<sup>a,b#</sup>, Yuxin Ding<sup>a,b#</sup>, Renchao Ma<sup>a</sup>, Xuqiong Xiao<sup>c</sup>, Rener Chen<sup>a</sup>, Lei Wang<sup>a</sup>, Yongmin Ma<sup>a,b\*</sup>

<sup>a</sup>Institute of Advanced Studies and School of Pharmaceutical Sciences, Taizhou University, Zhejiang, 318000, P R China

<sup>b</sup>School of Pharmaceutical Science, Zhejiang Chinese Medical University, Hangzhou, 310053, P R China

<sup>c</sup>Key Laboratory of Organosilicon Chemistry and Material Technology of Ministry of Education, Hangzhou Normal University, No. 2318 Yuhangtang Rd. Hangzhou, 311121, P R China

Email: yongmin.ma@tzc.edu.cn

## Contents

|                                          |    |
|------------------------------------------|----|
| 1. Table S1-S5 and Scheme S1.....        | S3 |
| 2. General methods .....                 | S6 |
| 3. Spectrum Data.....                    | S6 |
| 4. X-ray crystal data of <b>3b</b> ..... | 14 |
| 5. Copies of NMR spectra.....            | 20 |

**Table S1 Optimization of reaction conditions by screening the additives<sup>a</sup>**

| Entry | Additive (1 equiv.)                             | Yield (%) <sup>b</sup> |
|-------|-------------------------------------------------|------------------------|
| 1     | CF <sub>3</sub> SO <sub>3</sub> H               | 33                     |
| 2     | CH <sub>3</sub> COOH                            | 45                     |
| 3     | C <sub>5</sub> H <sub>5</sub> N                 | 70                     |
| 4     | Et <sub>3</sub> N                               | 34                     |
| 5     | NaOH                                            | 14                     |
| 6     | Na <sub>2</sub> CO <sub>3</sub>                 | 19                     |
| 7     | KH <sub>2</sub> PO <sub>4</sub>                 | 52                     |
| 8     | KHCO <sub>3</sub>                               | 6                      |
| 9     | CH <sub>3</sub> NH <sub>2</sub>                 | 33                     |
| 10    | CH <sub>3</sub> CH <sub>2</sub> NH <sub>2</sub> | 64                     |
| 11    | DEA                                             | 42                     |
| 12    | K <sub>2</sub> CO <sub>3</sub>                  | 0                      |
| 13    | Li <sub>2</sub> CO <sub>3</sub>                 | 58                     |
| 14    | NaOAc                                           | 47                     |

<sup>a</sup>Reaction condition: **1a** (1 mmol), **2** (2 equiv.), I<sub>2</sub> (0.1 equiv.) and additive (1 equiv.) in PhNO<sub>2</sub> (1 mL) at 140 °C for 24 h. <sup>b</sup>HPLC yield.

**Table S2 Optimization of reaction conditions by screening the amount of catalyst<sup>a</sup>**

| Entry | NiCl <sub>2</sub> (equiv.) | Yield (%) <sup>b</sup> |
|-------|----------------------------|------------------------|
| 1     | 0.1                        | 76                     |
| 2     | 0.2                        | 57                     |
| 3     | 0.3                        | 55                     |
| 4     | 0.5                        | 55                     |

<sup>a</sup>Reaction condition: **1a** (1 mmol), **2** (2 equiv.), I<sub>2</sub> (0.1 equiv.) and NiCl<sub>2</sub> at the indicated amount in PhNO<sub>2</sub> (1 mL) at 140 °C for 24 h. <sup>b</sup>HPLC yield.

**Table S3 Optimization of reaction conditions by screening the solvent volumes<sup>a</sup>**

|              |                              |                              |
|--------------|------------------------------|------------------------------|
|              |                              |                              |
| <b>Entry</b> | <b>PhNO<sub>2</sub> (mL)</b> | <b>Yield (%)<sup>b</sup></b> |
| 1            | 1                            | 46                           |
| 2            | 2                            | 38                           |
| 3            | 3                            | 36                           |
| 4            | 4                            | 26                           |

<sup>a</sup>Reaction condition: **1a** (1 mmol), **4** (1 equiv.) and I<sub>2</sub> (0.1 equiv.) in PhNO<sub>2</sub> (x mL) at 140 °C for 24 h. <sup>b</sup>HPLC yield.

**Table S4 Optimization of reaction conditions by screening the temperatures<sup>a</sup>**

|              |                         |                              |
|--------------|-------------------------|------------------------------|
|              |                         |                              |
| <b>Entry</b> | <b>Temperature (°C)</b> | <b>Yield (%)<sup>b</sup></b> |
| 1            | 100                     | <5                           |
| 2            | 110                     | 22                           |
| 3            | 120                     | 36                           |
| 4            | 130                     | 38                           |
| 5            | 140                     | 46                           |

<sup>a</sup>Reaction condition: **1a** (1 mmol), **4** (1 equiv.) and I<sub>2</sub> (0.1 equiv.) in PhNO<sub>2</sub> (1 mL) at x °C for 24 h. <sup>b</sup>HPLC yield.

**Table S5 Optimization of reaction conditions by screening the ratio of 1a and 4<sup>a</sup>**

|              |                      |                              |
|--------------|----------------------|------------------------------|
|              |                      |                              |
| <b>Entry</b> | <b>Ratio of 1a:4</b> | <b>Yield (%)<sup>b</sup></b> |
| 1            | 1:1                  | 46                           |
| 2            | 1:1.5                | 41                           |
| 3            | 1:2                  | 40                           |
| 4            | 1:2.5                | 36                           |

<sup>a</sup>Reaction condition: **1a** (1 mmol), **4** (x equiv.) and I<sub>2</sub> (0.1 equiv.) in PhNO<sub>2</sub> (1 mL) at 140 °C for 24 h. <sup>b</sup>HPLC yield.

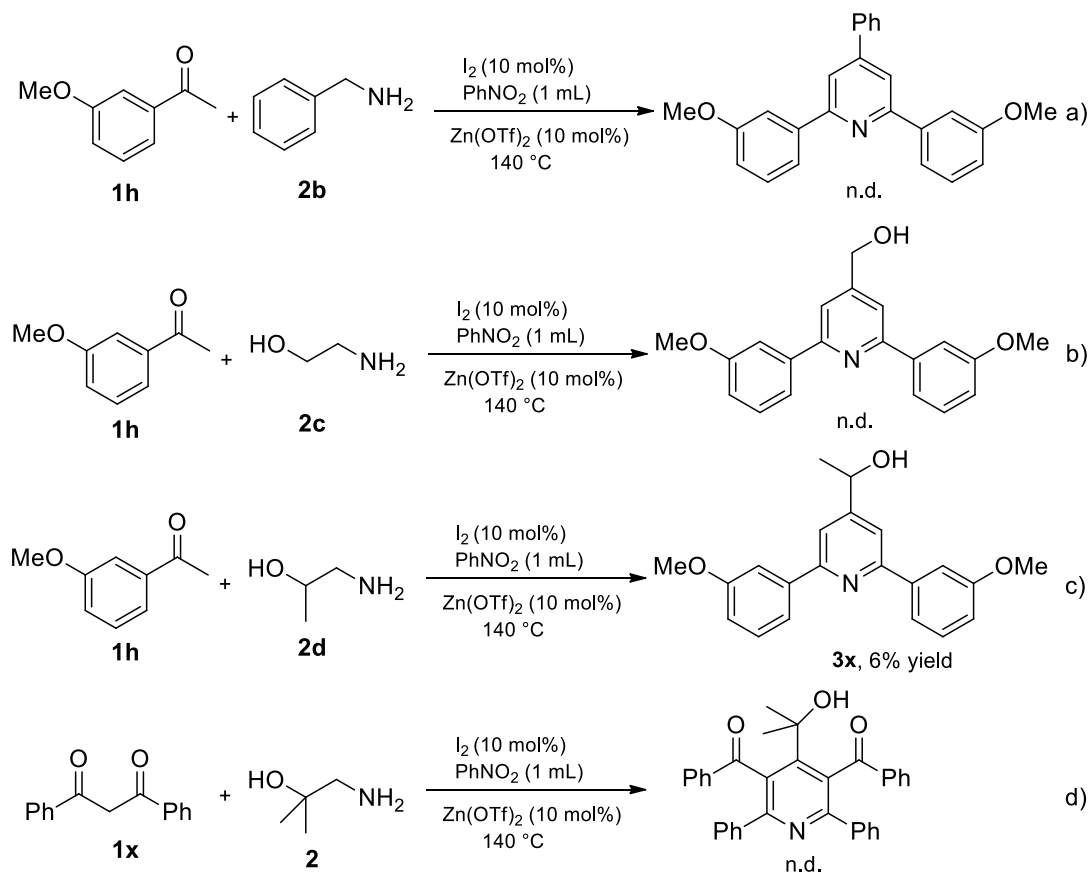

**Scheme S1** Additional attempts for the synthesis of pyridines

**General methods** All reagents and solvents were used from commercial sources unless otherwise stated. All raw materials are obtained from commercial sources. All experiments were conducted in the air. All the reactions were monitored by thin-layer chromatography (TLC). TLC was performed on pre-coated silica gel plates (Qingdao Haiyang Chemical Co., Ltd, China). Column chromatography was performed on silica gel (240-400 mesh) with petroleum ether and ethyl acetate as eluent. <sup>1</sup>H and <sup>13</sup>C NMR (400 and 101 MHz) spectra were recorded on a Bruker Avance 400 MHz using CDCl<sub>3</sub> as solvent with tetramethylsilane as the internal standard. Melting points are determined using an WRS-1B apparatus and are uncorrected. High resolution mass spectra were obtained with the Q-TOF-Premier mass spectrometer. Reactions were monitored by TLC and visualized with ultraviolet light.

**General Procedure for the synthesis of pyridine derivatives (3a as an example)**

Acetophenone (120 mg, 1 mmol), 1-amino-2-methylpropan-2-ol (178 mg, 2 mmol), I<sub>2</sub> (12.5 mg, 0.05 mmol), Zn(OTf)<sub>2</sub> (18 mg, 0.05 mmol) and nitrobenzene (1 mL) were added to a tube, the reaction mixture was stirred in a sealed tube at 140 °C for 24 h. The reaction was monitored by TLC. Once the reaction was completed, the reaction mixture was treated with H<sub>2</sub>O (15.0 mL) and EtOAc (8.0 mL). The organic and aqueous layers were then separated, and the aqueous layer was extracted with EtOAc (3 x 8 mL). The combined organic extracts were dried (Na<sub>2</sub>SO<sub>4</sub>), then the solvent was removed under reduced pressure and the remaining residue was purified by column chromatography. Compound **3a** (111 mg, 77% yield) was obtained as a white solid.

**General Procedure for the synthesis of pyrrole derivatives (5a as an example)**

Acetophenone (120 mg, 1 mmol), 1,2-diamino-2-methylpropane (88 mg, 1 mmol), I<sub>2</sub> (12.5 mg, 0.05 mmol), FeCl<sub>3</sub> (8 mg, 0.05 mmol) and nitrobenzene (1 mL) were added to a tube, the reaction mixture was stirred in a sealed tube at 140 °C for 24 h. The reaction was monitored by TLC. Once the reaction was completed, the reaction mixture was treated with H<sub>2</sub>O (15.0 mL) and EtOAc (8.0 mL). The organic and aqueous layers were then separated, and the aqueous layer was extracted with EtOAc (3 x 8 mL). The combined organic extracts were dried (Na<sub>2</sub>SO<sub>4</sub>), then the solvent was removed under reduced pressure and the remaining residue was purified by column chromatography. Compound **5a** (112 mg, 77% yield) was obtained as a yellow oil.

**2-(2,6-Diphenylpyridin-4-yl)propan-2-ol (3a):** Petroleum ether/ethyl acetate = 4:1; white solid (111 mg, 77%); <sup>1</sup>H NMR (400 MHz, CDCl<sub>3</sub>) δ 8.16 (d, *J* = 7.0 Hz, 4H), 7.79 (s, 2H), 7.52 – 7.41 (m, 6H), 1.66 (s, 6H). <sup>13</sup>C NMR (101 MHz, CDCl<sub>3</sub>) δ 159.3, 157.2, 139.7, 129.0, 128.7, 127.1, 114.8, 72.4, 31.5. HRMS(ESI): calcd. for C<sub>20</sub>H<sub>20</sub>NO<sup>+</sup> [M+H]<sup>+</sup> 290.1539; found: 290.1546.

**2-(2,6-Di-p-tolylpyridin-4-yl)propan-2-ol (3b):** Petroleum ether/ethyl acetate = 4:1; white solid (129 mg, 81%); <sup>1</sup>H NMR (400 MHz, CDCl<sub>3</sub>) δ 8.05 (d, *J* = 7.9 Hz, 4H), 7.73 (s, 2H), 7.29 (d, *J* = 7.9 Hz, 4H), 2.42 (s, 6H), 1.64 (s, 6H). <sup>13</sup>C NMR (101 MHz, CDCl<sub>3</sub>) δ 159.1, 157.1, 138.8, 137.0, 129.4, 127.0, 114.2, 72.4, 31.4, 21.3. HRMS(ESI): calcd. for C<sub>22</sub>H<sub>24</sub>NO<sup>+</sup> [M+H]<sup>+</sup> 318.1852; found: 318.1853.

**2-(2,6-Bis(4-methoxyphenyl)pyridin-4-yl)propan-2-ol (3c):** Petroleum ether/ethyl acetate = 4:1; white solid (141 mg, 81%); <sup>1</sup>H NMR (400 MHz, CDCl<sub>3</sub>) δ 8.11 (d, *J* = 8.4 Hz, 4H), 7.67 (s, 2H), 7.01 (d, *J* = 8.4 Hz, 4H), 3.88 (s, 6H), 2.00 (brs, 1H), 1.65 (s, 6H). <sup>13</sup>C NMR (101 MHz,

CDCl<sub>3</sub>) δ 160.4, 159.1, 156.7, 132.5, 128.4, 114.0, 113.3, 72.4, 55.4, 31.4. HRMS(ESI): calcd. for C<sub>22</sub>H<sub>24</sub>NO<sub>3</sub><sup>+</sup> [M+H]<sup>+</sup> 350.1751; found: 350.1756.

**2-(2,6-Bis(4-fluorophenyl)pyridin-4-yl)propan-2-ol (3d):** Petroleum ether/ethyl acetate = 4:1; white solid (104 mg, 64%); <sup>1</sup>H NMR (400 MHz, CDCl<sub>3</sub>) δ 8.13(dd, *J* = 8.8, 5.6 Hz, 4H), 7.74 (s, 2H), 7.18 (t, *J* = 8.8 Hz, 4H), 1.67 (s, 6H). <sup>13</sup>C NMR (101 MHz, CDCl<sub>3</sub>) δ 163.5 (d, *J* = 247 Hz), 159.6, 156.2, 135.7 (d, *J* = 3.1 Hz), 128.9 (d, *J* = 8.5 Hz), 115.6 (d, *J* = 21.6 Hz), 114.4, 72.4, 31.5. HRMS(ESI): calcd. for C<sub>20</sub>H<sub>18</sub>F<sub>2</sub>NO<sup>+</sup> [M+H]<sup>+</sup> 326.1351; found: 326.1355.

**2-(2,6-Bis(4-chlorophenyl)pyridin-4-yl)propan-2-ol (3e):** Petroleum ether/ethyl acetate = 4:1; white solid (111 mg, 62%); <sup>1</sup>H NMR (400 MHz, CDCl<sub>3</sub>) δ 8.08 (d, *J* = 8.6 Hz, 4H), 7.77 (s, 2H), 7.46 (d, *J* = 8.6 Hz, 4H), 1.66 (s, 6H). <sup>13</sup>C NMR (101 MHz, CDCl<sub>3</sub>) δ 159.8, 156.0, 137.9, 135.2, 128.8, 128.4, 114.8, 72.3, 31.5. HRMS(ESI): calcd. for C<sub>20</sub>H<sub>18</sub>Cl<sub>2</sub>NO<sup>+</sup> [M+H]<sup>+</sup> 358.0760; found: 358.0765.

**2-(2,6-Bis(4-bromophenyl)pyridin-4-yl)propan-2-ol (3f):** Petroleum ether/ethyl acetate = 4:1; white solid (140 mg, 63%); <sup>1</sup>H NMR (400 MHz, CDCl<sub>3</sub>) δ 8.02 (d, *J* = 8.4 Hz, 4H), 7.78 (s, 2H), 7.62 (d, *J* = 8.4 Hz, 4H), 1.66 (s, 6H). <sup>13</sup>C NMR (101 MHz, CDCl<sub>3</sub>) δ 159.8, 156.1, 138.4, 131.8, 128.7, 123.5, 114.8, 72.4, 31.5. HRMS(ESI): calcd. for C<sub>20</sub>H<sub>18</sub>Br<sub>2</sub>NO<sup>+</sup> [M+H]<sup>+</sup> 445.9750; found: 445.9747.

**2-(2,6-Di-*m*-tolylpyridin-4-yl)propan-2-ol (3g):** Petroleum ether/ethyl acetate = 4:1; white solid (119 mg, 75%); <sup>1</sup>H NMR (400 MHz, CDCl<sub>3</sub>) δ 7.95 (s, 2H), 7.92 (d, *J* = 7.9 Hz, 2H), 7.75 (s, 2H), 7.38 (t, *J* = 7.7 Hz, 2H), 7.24 (d, *J* = 8.0 Hz, 2H), 2.46 (s, 6H), 2.00 (brs, 1H), 1.65 (s, 6H). <sup>13</sup>C NMR (101 MHz, CDCl<sub>3</sub>) δ 159.2, 157.4, 139.8, 138.3, 129.7, 128.6, 127.9, 124.3, 114.9, 72.5, 31.5, 21.7. HRMS(ESI): calcd. for C<sub>22</sub>H<sub>24</sub>NO<sup>+</sup> [M+H]<sup>+</sup> 318.1852; found: 318.1849.

**2-(2,6-Bis(3-methoxyphenyl)pyridin-4-yl)propan-2-ol (3h):** Petroleum ether/ethyl acetate = 4:1; white solid (127 mg, 73%); <sup>1</sup>H NMR (400 MHz, CDCl<sub>3</sub>) δ 7.77 (s, 2H), 7.74 (t, *J* = 2.1 Hz, 2H), 7.70 (dd, *J* = 7.7, 1.6 Hz, 2H), 7.40 (t, *J* = 7.9 Hz, 2H), 6.98 (dd, *J* = 8.1, 2.6 Hz, 2H), 3.91 (s, 6H), 2.03 (brs, 1H), 1.65 (s, 6H). <sup>13</sup>C NMR (101 MHz, CDCl<sub>3</sub>) δ 160.0, 159.4, 156.8, 141.2, 129.7, 119.6, 115.1, 114.6, 112.7, 72.4, 55.4, 31.5. HRMS(ESI): calcd. for C<sub>22</sub>H<sub>24</sub>NO<sub>3</sub><sup>+</sup> [M+H]<sup>+</sup> 350.1751; found: 350.1756.

**2-(2,6-Bis(3-fluorophenyl)pyridin-4-yl)propan-2-ol (3i):** Petroleum ether/ethyl acetate = 4:1; white solid (107 mg, 66%); <sup>1</sup>H NMR (400 MHz, CDCl<sub>3</sub>) δ 7.91 – 7.87 (m, 4H), 7.79 (s, 2H), 7.48 – 7.42 (m, 2H), 7.12 (td, *J* = 8.4, 2.0 Hz, 2H), 2.01 (brs, 1H), 1.66 (s, 6H). <sup>13</sup>C NMR (101 MHz, CDCl<sub>3</sub>) δ 163.3 (d, *J* = 244 Hz), 159.8, 155.9 (d, *J* = 2.6 Hz), 141.8 (d, *J* = 7.4 Hz), 130.2 (d, *J* = 8.1 Hz), 122.6 (d, *J* = 2.7 Hz), 115.9 (d, *J* = 21.2 Hz), 115.4, 114.0 (d, *J* = 22.6 Hz), 72.4, 31.5. HRMS(ESI): calcd. for C<sub>20</sub>H<sub>18</sub>F<sub>2</sub>NO<sup>+</sup> [M+H]<sup>+</sup> 326.1351; found: 326.1348.

**2-(2,6-Bis(3-chlorophenyl)pyridin-4-yl)propan-2-ol (3j):** Petroleum ether/ethyl acetate = 4:1; yellow solid (114 mg, 64%); <sup>1</sup>H NMR (400 MHz, CDCl<sub>3</sub>) δ 8.13 (s, 2H), 8.03 (d, *J* = 7.8 Hz, 2H), 7.80 (s, 2H), 7.46 (d, *J* = 7.9 Hz, 2H), 7.41 (t, *J* = 7.9 Hz, 2H), 1.68 (s, 6H). <sup>13</sup>C NMR

(101 MHz, CDCl<sub>3</sub>)  $\delta$  159.9, 155.9, 141.2, 134.8, 130.0, 129.1, 127.2, 125.2, 115.5, 72.4, 31.6. HRMS(ESI): calcd. for C<sub>20</sub>H<sub>18</sub>Cl<sub>2</sub>NO<sup>+</sup> [M+H]<sup>+</sup> 358.0760; found: 358.0753.

**2-(2,6-Bis(3-bromophenyl)pyridin-4-yl)propan-2-ol (3k):** Petroleum ether/ethyl acetate = 4:1; white solid (131 mg, 59%); <sup>1</sup>H NMR (400 MHz, CDCl<sub>3</sub>)  $\delta$  8.27 (s, 2H), 8.07 (d, *J* = 7.8 Hz, 2H), 7.78 (s, 2H), 7.57 (d, *J* = 7.9 Hz, 2H), 7.37 (t, *J* = 7.9 Hz, 2H), 1.68 (s, 6H). <sup>13</sup>C NMR (101 MHz, CDCl<sub>3</sub>)  $\delta$  159.9, 155.8, 141.5, 132.0, 130.3, 130.1, 125.7, 123.0, 115.5, 72.4, 31.6. HRMS(ESI): calcd. for C<sub>20</sub>H<sub>18</sub>Br<sub>2</sub>NO<sup>+</sup> [M+H]<sup>+</sup> 445.9750; found: 445.9756.

**2-(2,6-Di-*o*-tolylpyridin-4-yl)propan-2-ol (3l):** Petroleum ether/ethyl acetate = 4:1; White solid (103 mg, 65%); <sup>1</sup>H NMR (400 MHz, CDCl<sub>3</sub>)  $\delta$  7.45 - 7.42 (m, 4H), 7.27 - 7.23 (m, 6H), 2.11 (brs, 1H), 1.65 (s, 6H). <sup>13</sup>C NMR (101 MHz, CDCl<sub>3</sub>)  $\delta$  159.6, 158.3, 140.9, 135.9, 130.7, 129.9, 128.2, 125.8, 118.2, 72.1, 31.4, 20.6. HRMS(ESI): calcd. for C<sub>22</sub>H<sub>24</sub>NO<sup>+</sup> [M+H]<sup>+</sup> 318.1852; found: 318.1856.

**2-(2,6-Bis(2-chlorophenyl)pyridin-4-yl)propan-2-ol (3m):** Petroleum ether/ethyl acetate = 4:1; white solid (102 mg, 57%); <sup>1</sup>H NMR (400 MHz, CDCl<sub>3</sub>)  $\delta$  7.74 (s, 2H), 7.69 (d, *J* = 7.4 Hz, 2H), 7.49 (d, *J* = 7.6 Hz, 2H), 7.37 - 7.30 (m, 4H), 2.00 (brs, 1H), 1.65 (s, 6H). <sup>13</sup>C NMR (101 MHz, CDCl<sub>3</sub>)  $\delta$  157.8, 156.7, 139.3, 132.3, 131.9, 130.1, 129.6, 127.1, 119.6, 72.3, 31.3. HRMS(ESI): calcd. for C<sub>20</sub>H<sub>18</sub>Cl<sub>2</sub>NO<sup>+</sup> [M+H]<sup>+</sup> 358.0760; found: 358.0757.

**2-(2,6-Bis(2-bromophenyl)pyridin-4-yl)propan-2-ol (3n):** Petroleum ether/ethyl acetate = 4:1; yellow solid (116 mg, 52%); <sup>1</sup>H NMR (400 MHz, CDCl<sub>3</sub>)  $\delta$  7.71 (s, 2H), 7.67 (t, *J* = 7.6 Hz, 4H), 7.40 (t, *J* = 7.7 Hz, 2H), 7.24 (d, *J* = 7.9 Hz, 2H), 1.66 (s, 6H). <sup>13</sup>C NMR (101 MHz, CDCl<sub>3</sub>)  $\delta$  158.0, 157.7, 141.3, 133.3, 131.8, 129.8, 127.6, 121.9, 119.6, 72.3, 31.3. HRMS(ESI): calcd. for C<sub>20</sub>H<sub>18</sub>Br<sub>2</sub>NO<sup>+</sup> [M+H]<sup>+</sup> 445.9750; found: 445.9757.

**2-(2,6-Bis(2,4-dimethylphenyl)pyridin-4-yl)propan-2-ol (3o):** Petroleum ether/ethyl acetate = 4:1; White solid (116 mg, 67%); <sup>1</sup>H NMR (400 MHz, CDCl<sub>3</sub>)  $\delta$  7.41 (s, 2H), 7.36 (d, *J* = 7.9 Hz, 2H), 7.09 (s, 2H), 7.07 (d, *J* = 7.9 Hz, 2H), 2.40 (s, 6H), 2.35 (s, 6H), 1.80 (brs, 1H), 1.62 (s, 6H). <sup>13</sup>C NMR (101 MHz, CDCl<sub>3</sub>)  $\delta$  159.6, 157.9, 138.1, 137.9, 135.7, 131.5, 129.9, 126.5, 117.9, 72.2, 31.4, 21.2, 20.6. HRMS(ESI): calcd. for C<sub>24</sub>H<sub>28</sub>NO<sup>+</sup> [M+H]<sup>+</sup> 346.2165; found: 346.2171.

**2-(2,6-Bis(3,4-dimethylphenyl)pyridin-4-yl)propan-2-ol (3p):** Petroleum ether/ethyl acetate = 4:1; White solid (128 mg, 74%); <sup>1</sup>H NMR (400 MHz, CDCl<sub>3</sub>)  $\delta$  7.92 (s, 2H), 7.86 (d, *J* = 7.8 Hz, 2H), 7.72 (s, 2H), 7.25 (d, *J* = 7.8 Hz, 2H), 2.38 (s, 6H), 2.33 (s, 6H), 1.79 (brs, 1H), 1.66 (s, 6H). <sup>13</sup>C NMR (101 MHz, CDCl<sub>3</sub>)  $\delta$  159.0, 157.3, 137.52, 136.8, 129.9, 128.3, 124.6, 114.3, 72.5, 31.4, 20.0, 19.7. HRMS(ESI): calcd. for C<sub>24</sub>H<sub>28</sub>NO<sup>+</sup> [M+H]<sup>+</sup> 346.2165; found: 346.2170.

**2-(2,6-Bis(3,4-dichlorophenyl)pyridin-4-yl)propan-2-ol (3q):** Petroleum ether/ethyl acetate = 4:1; White solid (134 mg, 63%); <sup>1</sup>H NMR (400 MHz, CDCl<sub>3</sub>)  $\delta$  8.23 (d, *J* = 2.0 Hz, 2H), 7.98 (dd, *J* = 8.4, 2.0 Hz, 2H), 7.78 (s, 2H), 7.57 (d, *J* = 8.4 Hz, 2H), 1.98 (brs, 1H), 1.68 (s, 6H). <sup>13</sup>C



NMR (101 MHz, CDCl<sub>3</sub>) δ 160.2, 155.0, 139.2, 133.3, 133.0, 130.7, 128.9, 126.2, 115.4, 72.4, 31.6. HRMS(ESI): calcd. for C<sub>20</sub>H<sub>16</sub>Cl<sub>4</sub>NO<sup>+</sup> [M+H]<sup>+</sup> 425.9981; found: 425.9975.

**2-(2,6-Bis(3,5-dimethoxyphenyl)pyridin-4-yl)propan-2-ol (3r):** Petroleum ether/ethyl acetate = 4:1; White solid (157 mg, 77%); <sup>1</sup>H NMR (400 MHz, CDCl<sub>3</sub>) δ 7.74 (s, 2H), 7.30 (d, *J* = 2.0 Hz, 4H), 6.54 (t, *J* = 2.0 Hz, 2H), 3.87 (s, 12H), 2.19 (brs, 1H), 1.63 (s, 6H). <sup>13</sup>C NMR (101 MHz, CDCl<sub>3</sub>) δ 161.0, 159.5, 156.6, 141.8, 115.4, 105.4, 101.0, 72.3, 55.5, 31.4. HRMS(ESI): calcd. for C<sub>24</sub>H<sub>28</sub>NO<sub>5</sub><sup>+</sup> [M+H]<sup>+</sup> 410.1962; found: 410.1957.

**2-(2,6-Bis(3-chloro-4-methoxyphenyl)pyridin-4-yl)propan-2-ol (3s):** Petroleum ether/ethyl acetate = 4:1; White solid (138 mg, 66%); <sup>1</sup>H NMR (400 MHz, CDCl<sub>3</sub>) δ 8.17 (d, *J* = 2.0 Hz, 2H), 8.03 (dd, *J* = 8.8, 2.0 Hz, 2H), 7.67 (s, 2H), 7.03 (d, *J* = 8.6 Hz, 2H), 3.97 (s, 6H), 1.99 (brs, 1H), 1.66 (s, 6H). <sup>13</sup>C NMR (101 MHz, CDCl<sub>3</sub>) δ 159.6, 155.7, 155.5, 133.0, 128.8, 126.5, 122.8, 113.9, 111.9, 72.4, 56.3, 31.5. HRMS(ESI): calcd. for C<sub>22</sub>H<sub>22</sub>Cl<sub>2</sub>NO<sub>3</sub><sup>+</sup> [M+H]<sup>+</sup> 418.0971; found: 418.0978.

**2-(2,6-Di(naphthalen-2-yl)pyridin-4-yl)propan-2-ol (3t):** Petroleum ether/ethyl acetate = 4:1; White solid (150 mg, 77%); <sup>1</sup>H NMR (400 MHz, CDCl<sub>3</sub>) δ 8.64 (s, 2H), 8.38 (dd, *J* = 8.6, 1.8 Hz, 2H), 8.00 – 7.97 (m, 6H), 7.91 – 7.87 (m, 2H), 7.54 – 7.50 (m, 4H), 2.04 (brs, 1H), 1.73 (s, 6H). <sup>13</sup>C NMR (101 MHz, CDCl<sub>3</sub>) δ 159.5, 157.2, 137.1, 133.7, 133.5, 128.8, 128.4, 127.7, 126.5, 126.5, 126.3, 125.0, 115.2, 72.6, 31.6. HRMS(ESI): calcd. for C<sub>28</sub>H<sub>24</sub>NO<sup>+</sup> [M+H]<sup>+</sup> 390.1852; found: 390.1846.

**2-(2,6-Di(naphthalen-1-yl)pyridin-4-yl)propan-2-ol (3u):** Petroleum ether/ethyl acetate = 4:1; White solid (123 mg, 63%); <sup>1</sup>H NMR (400 MHz, CDCl<sub>3</sub>) δ 8.23 – 8.18 (m, 2H), 7.91 – 7.85 (m, 4H), 7.73 – 7.71 (m, 4H), 7.55 (t, *J* = 7.6 Hz, 2H), 7.51 – 7.48 (m, 4H), 2.04 (brs, 1H), 1.67 (s, 6H). <sup>13</sup>C NMR (101 MHz, CDCl<sub>3</sub>) δ 159.2, 158.7, 138.9, 134.0, 131.4, 128.9, 128.4, 127.8, 126.4, 125.8, 125.7, 125.4, 119.6, 72.3, 31.5. HRMS(ESI): calcd. for C<sub>28</sub>H<sub>24</sub>NO<sup>+</sup> [M+H]<sup>+</sup> 390.1852; found: 390.1856.

**2-(2,6-Di(thiophen-3-yl)pyridin-4-yl)propan-2-ol (3v):** Petroleum ether/ethyl acetate = 4:1; yellow solid (62 mg, 41%); <sup>1</sup>H NMR (400 MHz, CDCl<sub>3</sub>) δ 8.01 (dd, *J* = 3.2, 1.2 Hz, 2H), 7.78 (dd, *J* = 5.2, 1.2 Hz, 2H), 7.61 (s, 2H), 7.41 (dd, *J* = 5.2, 3.2 Hz, 2H), 1.65 (s, 6H). <sup>13</sup>C NMR (101 MHz, CDCl<sub>3</sub>) δ 159.3, 153.4, 142.6, 126.5, 126.1, 123.7, 114.3, 72.3, 31.4. HRMS(ESI): calcd. for C<sub>16</sub>H<sub>16</sub>NOS<sub>2</sub><sup>+</sup> [M+H]<sup>+</sup> 302.0668; found: 302.0673.

**1-(2,5-Di(pyridin-2-yl)-1H-pyrrol-1-yl)-2-methylpropan-2-ol (3w):** Petroleum ether/ethyl acetate = 4:1; white solid (66 mg, 45%); <sup>1</sup>H NMR (400 MHz, CDCl<sub>3</sub>) δ 8.56 (d, *J* = 4.4 Hz, 2H), 7.74 (t, *J* = 7.6 Hz, 2H), 7.59 (d, *J* = 8.0 Hz, 2H), 7.19 (t, *J* = 6.40 Hz, 2H), 6.59 (s, 2H), 5.05 (s, 2H), 0.98 (s, 6H). <sup>13</sup>C NMR (101 MHz, CDCl<sub>3</sub>) δ 152.8, 147.8, 137.3, 135.5, 124.1, 121.3, 112.2, 70.7, 52.9, 28.2. HRMS(ESI): calcd. for C<sub>18</sub>H<sub>20</sub>N<sub>3</sub>O<sup>+</sup> [M+H]<sup>+</sup> 294.1601; found: 294.1597.

**2-(2,2-Dimethyl-5-phenyl-3,4-dihydro-2H-pyrrol-3-yl)-1-phenylethanone (5a):** Petroleum

ether/ethyl acetate = 4:1; yellow oil (112 mg, 77%); <sup>1</sup>H NMR (400 MHz, CDCl<sub>3</sub>) δ 8.00 (d, *J* = 7.2 Hz, 2H), 7.81 (d, *J* = 7.6 Hz, 2H), 7.59 (t, *J* = 7.4 Hz, 1H), 7.49 (t, *J* = 7.6 Hz, 2H), 7.45 – 7.34 (m, 3H), 3.48 – 3.35 (m, 1H), 3.27 (dd, *J* = 16.0, 3.2 Hz, 1H), 3.00 (dd, *J* = 16.4, 10.4 Hz, 1H), 2.72 – 2.57 (m, 2H), 1.46 (s, 3H), 1.20 (s, 3H). <sup>13</sup>C NMR (101 MHz, CDCl<sub>3</sub>) 199.6, 169.8, 136.9, 134.6, 133.3, 130.4, 128.7, 128.4, 128.1, 127.6, 73.5, 42.9, 41.2, 39.6, 28.8, 22.8. HRMS (ESI): calcd. for C<sub>20</sub>H<sub>22</sub>NO<sup>+</sup> [M+H]<sup>+</sup> 292.1696; found: 292.1702.

**2-(2,2-Dimethyl-5-(*p*-tolyl)-3,4-dihydro-2*H*-pyrrol-3-yl)-1-(*p*-tolyl)ethanone (5b):** Petroleum ether/ethyl acetate = 4:1; white solid (125 mg, 78%); <sup>1</sup>H NMR (400 MHz, CDCl<sub>3</sub>) δ 7.89 (d, *J* = 8.0 Hz, 2H), 7.69 (d, *J* = 7.9 Hz, 2H), 7.28 (d, *J* = 8.0 Hz, 2H), 7.18 (d, *J* = 7.9 Hz, 2H), 3.44 – 3.30 (m, 1H), 3.23 (dd, *J* = 16.4, 2.8 Hz, 1H), 2.95 (dd, *J* = 16.0, 3.2 Hz, 1H), 2.72 – 2.55 (m, 2H), 2.42 (s, 3H), 2.36 (s, 3H), 1.44 (s, 3H), 1.19 (s, 3H). <sup>13</sup>C NMR (101 MHz, CDCl<sub>3</sub>) 199.3, 169.7, 144.1, 140.6, 134.5, 131.9, 129.4, 129.1, 128.2, 127.6, 73.3, 43.0, 41.1, 39.5, 28.8, 22.8, 21.7, 21.4. HRMS (ESI): calcd. for C<sub>22</sub>H<sub>26</sub>NO<sup>+</sup> [M+H]<sup>+</sup> 320.2009; found: 320.2007.

**1-(4-Methoxyphenyl)-2-(5-(4-methoxyphenyl)-2,2-dimethyl-3,4-dihydro-2*H*-pyrrol-3-yl)ethanone (5c):** Petroleum ether/ethyl acetate = 2:1; yellow oil (132 mg, 75%); <sup>1</sup>H NMR (400 MHz, CDCl<sub>3</sub>) δ 7.97 (d, *J* = 8.8 Hz, 2H), 7.75 (d, *J* = 8.8 Hz, 2H), 6.96 (d, *J* = 8.9 Hz, 2H), 6.88 (d, *J* = 8.8 Hz, 2H), 3.88 (s, 3H), 3.82 (s, 3H), 3.40 – 3.28 (m, 1H), 3.19 (dd, *J* = 16.2, 3.3 Hz, 1H), 2.93 (dd, *J* = 16.2, 10.4 Hz, 1H), 2.66 – 2.53 (m, 2H), 1.43 (s, 3H), 1.18 (s, 3H). <sup>13</sup>C NMR (101 MHz, CDCl<sub>3</sub>) 198.2, 169.1, 163.6, 161.4, 130.4, 130.0, 129.2, 127.5, 113.8, 113.7, 73.2, 55.5, 55.3, 43.2, 41.1, 39.3, 28.8, 22.8. HRMS (ESI): calcd. for C<sub>22</sub>H<sub>26</sub>NO<sub>3</sub><sup>+</sup> [M+H]<sup>+</sup> 352.1907; found: 352.1912.

**1-(4-Fluorophenyl)-2-(5-(4-fluorophenyl)-2,2-dimethyl-3,4-dihydro-2*H*-pyrrol-3-yl)ethanone (5d):** Petroleum ether/ethyl acetate = 4:1; yellow oil (116 mg, 71%); <sup>1</sup>H NMR (400 MHz, CDCl<sub>3</sub>) δ 8.02 (dd, *J* = 8.8, 5.4 Hz, 2H), 7.80 (dd, *J* = 8.8, 5.6 Hz, 2H), 7.16 (t, *J* = 8.4 Hz, 2H), 7.06 (t, *J* = 8.4 Hz, 2H), 3.39 (dd, *J* = 15.6, 7.2 Hz, 1H), 3.23 (dd, *J* = 16.7, 3.3 Hz, 1H), 2.96 (dd, *J* = 16.8, 10.4 Hz, 1H), 2.67 – 2.54 (m, 2H), 1.44 (s, 3H), 1.19 (s, 3H). <sup>13</sup>C NMR (101 MHz, CDCl<sub>3</sub>) 197.8, 168.6, 165.8 (d, *J* = 255 Hz), 164.7 (d, *J* = 249 Hz), 133.3 (d, *J* = 2.9 Hz), 130.9 (d, *J* = 2.2 Hz), 130.7 (d, *J* = 10.3 Hz), 129.6 (d, *J* = 8.6 Hz), 115.8 (d, *J* = 21.8 Hz), 115.4 (d, *J* = 21.6 Hz), 73.5, 42.9, 41.2, 39.5, 28.8, 22.8. HRMS (ESI): calcd. for C<sub>20</sub>H<sub>20</sub>F<sub>2</sub>NO<sup>+</sup> [M+H]<sup>+</sup> 328.1507; found: 328.1511.

**1-(4-Chlorophenyl)-2-(5-(4-chlorophenyl)-2,2-dimethyl-3,4-dihydro-2*H*-pyrrol-3-yl)ethanone (5e):** Petroleum ether/ethyl acetate = 4:1; yellow oil (130 mg, 72%); <sup>1</sup>H NMR (400 MHz, CDCl<sub>3</sub>) δ 7.93 (d, *J* = 8.3 Hz, 2H), 7.73 (d, *J* = 8.3 Hz, 2H), 7.46 (d, *J* = 8.3 Hz, 2H), 7.35 (d, *J* = 8.2 Hz, 2H), 3.37 (dd, *J* = 15.6, 7.3 Hz, 1H), 3.22 (dd, *J* = 16.8, 3.4 Hz, 1H), 2.95 (dd, *J* = 16.8, 10.1 Hz, 1H), 2.66 – 2.51 (m, 2H), 1.44 (s, 3H), 1.18 (s, 3H). <sup>13</sup>C NMR (101 MHz, CDCl<sub>3</sub>) 198.2, 168.7, 139.8, 136.5, 135.1, 133.1, 129.5, 129.1, 128.9, 128.6, 73.6, 42.9, 41.1, 39.6, 28.7, 22.7. HRMS (ESI): calcd. for C<sub>20</sub>H<sub>20</sub>Cl<sub>2</sub>NO<sup>+</sup> [M+H]<sup>+</sup> 360.0916; found: 360.0921.

**1-(4-Bromophenyl)-2-(5-(4-bromophenyl)-2,2-dimethyl-3,4-dihydro-2*H*-pyrrol-3-**

**yl)ethanone (5f):** Petroleum ether/ethyl acetate = 4:1; yellow oil (152 mg, 68%); <sup>1</sup>H NMR (400 MHz, CDCl<sub>3</sub>) δ 7.85 (d, *J* = 8.6 Hz, 2H), 7.66 (d, *J* = 8.4 Hz, 2H), 7.63 (d, *J* = 8.8 Hz, 2H), 7.51 (d, *J* = 8.4 Hz, 2H), 3.37 (dd, *J* = 15.7, 7.2 Hz, 1H), 3.22 (dd, *J* = 16.8, 3.4 Hz, 1H), 2.94 (dd, *J* = 16.8, 10.1 Hz, 1H), 2.69 – 2.53 (m, 2H), 1.44 (s, 3H), 1.18 (s, 3H). <sup>13</sup>C NMR (101 MHz, CDCl<sub>3</sub>) 198.3, 168.8, 135.5, 133.5, 132.1, 131.6, 129.6, 129.1, 128.5, 124.9, 73.6, 42.8, 41.0, 39.5, 28.7, 22.7. HRMS(ESI): calcd. for C<sub>20</sub>H<sub>20</sub>Br<sub>2</sub>NO<sup>+</sup> [M+H]<sup>+</sup> 447.9906; found: 447.9912.

**1-(4-(Trifluoromethyl)phenyl)-2-(5-(4-(trifluoromethyl)phenyl)-2,2-dimethyl-3,4-dihydro-2H-pyrrol-3-yl)ethanone (5g):** Petroleum ether/ethyl acetate = 4:1; yellow oil (122 mg, 57%); <sup>1</sup>H NMR (400 MHz, CDCl<sub>3</sub>) δ 8.10 (d, *J* = 7.9 Hz, 2H), 7.92 (d, *J* = 7.9 Hz, 2H), 7.77 (d, *J* = 8.0 Hz, 2H), 7.65 (d, *J* = 8.0 Hz, 2H), 3.45 (dd, *J* = 15.4, 7.1 Hz, 1H), 3.30 (dd, *J* = 17.2, 3.4 Hz, 1H), 3.03 (dd, *J* = 17.0, 9.9 Hz, 1H), 2.77 – 2.58 (m, 2H), 1.47 (s, 3H), 1.21 (s, 3H). <sup>13</sup>C NMR (101 MHz, CDCl<sub>3</sub>) 198.3, 168.6, 139.4, 137.8, 134.7 (d, *J* = 32.7 Hz), 132.1 (d, *J* = 32.5 Hz), 128.4, 127.9, 125.9 (q, *J* = 3.7 Hz), 125.4 (d, *J* = 3.8 Hz), 123.5 (q, *J* = 271 Hz), 121.5 (q, *J* = 223 Hz), 73.9, 42.7, 41.2, 39.9, 28.7, 22.7. HRMS(ESI): calcd. for C<sub>22</sub>H<sub>20</sub>F<sub>6</sub>NO<sup>+</sup> [M+H]<sup>+</sup> 428.1444; found: 428.1447.

**2-(2,2-Dimethyl-5-(*m*-tolyl)-3,4-dihydro-2H-pyrrol-3-yl)-1-(*m*-tolyl)ethanone (5h):** Petroleum ether/ethyl acetate = 4:1; yellow oil (120 mg, 75%); <sup>1</sup>H NMR (400 MHz, CDCl<sub>3</sub>) δ 7.80 (s, 1H), 7.79 (d, *J* = 7.8 Hz, 1H), 7.68 (s, 1H), 7.55 (d, *J* = 7.5 Hz, 1H), 7.41 – 7.35 (m, 2H), 7.29 – 7.20 (m, 2H), 3.45 – 3.35 (m, 1H), 3.25 (dd, *J* = 16.6, 3.0 Hz, 1H), 2.97 (dd, *J* = 16.4, 10.4 Hz, 1H), 2.67 – 2.56 (m, 2H), 2.43 (s, 3H), 2.37 (s, 3H), 1.45 (s, 3H), 1.20 (s, 3H). <sup>13</sup>C NMR (101 MHz, CDCl<sub>3</sub>) 199.8, 170.0, 138.5, 138.1, 137.0, 134.6, 134.0, 131.2, 128.6, 128.6, 128.3, 128.0, 125.3, 124.9, 73.4, 42.9, 41.2, 39.7, 28.8, 22.8, 21.4, 21.3. HRMS(ESI): calcd. for C<sub>22</sub>H<sub>26</sub>NO<sup>+</sup> [M+H]<sup>+</sup> 320.2009; found: 320.2006.

**1-(3-Methoxyphenyl)-2-(5-(3-methoxyphenyl)-2,2-dimethyl-3,4-dihydro-2H-pyrrol-3-yl)ethanone (5i):** Petroleum ether/ethyl acetate = 2:1; yellow oil (127 mg, 72%); <sup>1</sup>H NMR (400 MHz, CDCl<sub>3</sub>) δ 7.56 (d, *J* = 7.2 Hz, 1H), 7.51 (s, 1H), 7.44 – 7.38 (m, 2H), 7.34 (d, *J* = 7.2 Hz, 1H), 7.28 (t, *J* = 7.2 Hz, 1H), 7.13 (dd, *J* = 8.0, 2.0 Hz, 1H), 6.96 (dd, *J* = 7.6, 2.0 Hz, 1H), 3.87 (s, 3H), 3.84 (s, 3H), 3.44 – 3.36 (m, 1H), 3.24 (dd, *J* = 16.8, 3.2 Hz, 1H), 2.98 (dd, *J* = 16.8, 5.2 Hz, 1H), 2.65 – 2.56 (m, 2H), 1.46 (s, 3H), 1.20 (s, 3H). <sup>13</sup>C NMR (101 MHz, CDCl<sub>3</sub>) 199.4, 169.8, 159.9, 159.7, 138.2, 136.0, 129.7, 129.4, 120.7, 120.3, 119.6, 117.0, 112.4, 112.0, 73.5, 55.49, 55.46, 42.9, 41.3, 39.7, 28.7, 22.7. HRMS(ESI): calcd. for C<sub>22</sub>H<sub>26</sub>NO<sub>3</sub><sup>+</sup> [M+H]<sup>+</sup> 352.1907; found: 352.1913.

**1-(3-Fluorophenyl)-2-(5-(3-fluorophenyl)-2,2-dimethyl-3,4-dihydro-2H-pyrrol-3-yl)ethanone (5j):** Petroleum ether/ethyl acetate = 4:1; yellow oil (115 mg, 70%); <sup>1</sup>H NMR (400 MHz, CDCl<sub>3</sub>) δ 7.77 (d, *J* = 7.8 Hz, 1H), 7.67 (d, *J* = 9.2 Hz, 1H), 7.56 (s, 1H), 7.53 (s, 1H), 7.51 – 7.45 (m, 1H), 7.36 (t, *J* = 7.2 Hz, 1H), 7.31 (d, *J* = 9.2 Hz, 1H), 7.11 (t, *J* = 8.2 Hz, 1H), 3.39 (dd, *J* = 15.9, 7.4 Hz, 1H), 3.24 (d, *J* = 16.9 Hz, 1H), 2.97 (dd, *J* = 17.0, 10.2 Hz, 1H), 2.70 – 2.55 (m, 2H), 1.46 (s, 3H), 1.19 (s, 3H). <sup>13</sup>C NMR (101 MHz, CDCl<sub>3</sub>) 198.1 (d, *J* = 2.0 Hz), 168.7 (d, *J* = 2.7 Hz), 162.9 (d, *J* = 247 Hz), 162.8 (d, *J* = 245 Hz), 138.9 (d, *J* = 6.0 Hz), 136.9 (d, *J* = 7.1 Hz), 130.4 (d, *J* = 10.0 Hz), 128.9 (d, *J* = 8.1 Hz), 123.8 (d, *J* = 4.0 Hz), 123.4 (d, *J*

= 3.0 Hz), 120.3 (d,  $J = 21.2$  Hz), 120.3 (d,  $J = 21.2$  Hz), 114.8 (d,  $J = 22.2$  Hz), 114.3 (d,  $J = 22.2$  Hz), 73.6, 42.8, 41.2, 39.7, 28.7, 22.7. HRMS(ESI): calcd. for  $C_{20}H_{20}F_2NO^+$   $[M+H]^+$  328.1507; found: 328.1511.

**1-(3-Chlorophenyl)-2-(5-(3-chlorophenyl)-2,2-dimethyl-3,4-dihydro-2H-pyrrol-3-yl)ethanone (5k):** Petroleum ether/ethyl acetate = 4:1; yellow oil (122 mg, 68%);  $^1H$  NMR (400 MHz,  $CDCl_3$ )  $\delta$  7.95 (s, 1H), 7.86 (d,  $J = 7.2$  Hz, 1H), 7.83 (s, 1H), 7.65 (d,  $J = 7.7$  Hz, 1H), 7.57 (d,  $J = 8.1$  Hz, 1H), 7.44 (t,  $J = 7.8$  Hz, 1H), 7.39 (d,  $J = 8.1$  Hz, 1H), 7.32 (t,  $J = 8.3$  Hz, 1H), 3.39 (dd,  $J = 16.2, 7.6$  Hz, 1H), 3.23 (d,  $J = 17.1$  Hz, 1H), 2.97 (dd,  $J = 17.0, 10.2$  Hz, 1H), 2.70 – 2.51 (m, 2H), 1.45 (s, 3H), 1.20 (s, 3H).  $^{13}C$  NMR (101 MHz,  $CDCl_3$ ) 198.0, 168.6, 138.4, 136.3, 135.1, 134.6, 133.2, 130.4, 130.1, 129.7, 128.2, 127.6, 126.1, 125.7, 73.7, 42.7, 41.1, 39.7, 28.7, 22.7. HRMS(ESI): calcd. for  $C_{20}H_{20}Cl_2NO^+$   $[M+H]^+$  360.0916; found: 360.0919.

**1-(3-Bromophenyl)-2-(5-(3-bromophenyl)-2,2-dimethyl-3,4-dihydro-2H-pyrrol-3-yl)ethanone (5l):** Petroleum ether/ethyl acetate = 4:1; yellow oil (154 mg, 69%);  $^1H$  NMR (400 MHz,  $CDCl_3$ )  $\delta$  8.11 (s, 1H), 7.99 (s, 1H), 7.91 (d,  $J = 7.8$  Hz, 1H), 7.73 (d,  $J = 9.2$  Hz, 1H), 7.70 (d,  $J = 9.2$  Hz, 1H), 7.54 (d,  $J = 8.0$  Hz, 1H), 7.38 (t,  $J = 7.8$  Hz, 1H), 7.25 (t,  $J = 7.6$  Hz, 1H), 3.39 (dd,  $J = 16.3, 7.6$  Hz, 1H), 3.22 (d,  $J = 17.2$  Hz, 1H), 2.96 (dd,  $J = 17.1, 10.4$  Hz, 1H), 2.73 – 2.52 (m, 2H), 1.45 (s, 3H), 1.19 (s, 3H).  $^{13}C$  NMR (101 MHz,  $CDCl_3$ ) 197.9, 168.5, 138.6, 136.6, 136.2, 133.3, 131.1, 130.5, 130.3, 130.0, 126.5, 126.2, 123.1, 122.8, 73.7, 42.7, 41.1, 39.7, 28.7, 22.7. HRMS(ESI): calcd. for  $C_{20}H_{20}Br_2NO^+$   $[M+H]^+$  447.9906; found: 447.9910.

**2-(2,2-Dimethyl-5-(*o*-tolyl)-3,4-dihydro-2H-pyrrol-3-yl)-1-(*o*-tolyl)ethan-1-one (5m):** Petroleum ether/ethyl acetate = 4:1; yellow oil (45 mg, 28%);  $^1H$  NMR (400 MHz,  $CDCl_3$ )  $\delta$  7.67 (d,  $J = 7.6$  Hz, 1H), 7.40 (t,  $J = 7.6$  Hz, 1H), 7.35 (d,  $J = 7.6$  Hz, 1H), 7.33 – 7.18 (m, 5H), 3.28 – 3.22 (m, 1H), 3.18 (dd,  $J = 16.8, 3.2$  Hz, 1H), 2.92 (dd,  $J = 16.8, 10.4$  Hz, 1H), 2.66 – 2.58 (m, 2H), 2.51 (s, 3H), 2.46 (s, 3H), 1.44 (s, 3H), 1.18 (s, 3H).  $^{13}C$  NMR (101 MHz,  $CDCl_3$ )  $\delta$  203.7, 171.8, 138.0, 138.0, 136.5, 135.4, 132.1, 131.4, 131.0, 128.9, 128.3, 125.8, 125.6, 73.8, 44.6, 43.1, 42.6, 28.8, 22.7, 21.3, 20.9. HRMS(ESI): calcd. for  $C_{22}H_{26}NO^+$   $[M+H]^+$  320.2009; found: 320.2004.

**1-(3,4-Dimethylphenyl)-2-(5-(3,4-dimethylphenyl)-2,2-dimethyl-3,4-dihydro-2H-pyrrol-3-yl)ethan-1-one (5n):** Petroleum ether/ethyl acetate = 4:1; yellow oil (120 mg, 69%);  $^1H$  NMR (400 MHz,  $CDCl_3$ )  $\delta$  7.76 (s, 1H), 7.72 (d,  $J = 7.6$  Hz, 1H), 7.63 (s, 1H), 7.48 (d,  $J = 7.6$  Hz, 1H), 7.23 (d,  $J = 8.0$  Hz, 1H), 7.14 (d,  $J = 8.0$  Hz, 1H), 3.40 – 3.30 (m, 1H), 3.21 (dd,  $J = 16.4, 3.2$  Hz, 1H), 2.94 (dd,  $J = 16.4, 10.4$  Hz, 1H), 2.65 – 2.55 (m, 2H), 2.33 (s, 6H), 2.27 (s, 6H), 1.44 (s, 3H), 1.19 (s, 3H).  $^{13}C$  NMR (101 MHz,  $CDCl_3$ )  $\delta$  199.7, 169.9, 142.8, 139.4, 137.1, 136.7, 134.8, 132.3, 129.9, 129.6, 129.2, 128.5, 125.8, 125.3, 73.3, 43.0, 41.1, 39.5, 28.8, 22.8, 20.1, 19.9, 19.8, 19.7. HRMS(ESI): calcd. for  $C_{24}H_{30}NO^+$   $[M+H]^+$  348.2322; found: 348.2318.

**1-(3,5-Dimethoxyphenyl)-2-(5-(3,5-dimethoxyphenyl)-2,2-dimethyl-3,4-dihydro-2H-pyrrol-3-yl)ethan-1-one (5o):** Petroleum ether/ethyl acetate = 4:1; yellow oil (136 mg, 66%);

$^1\text{H}$  NMR (400 MHz,  $\text{CDCl}_3$ )  $\delta$  7.12 (d,  $J = 2.4$  Hz, 2H), 6.95 (d,  $J = 2.4$  Hz, 2H), 6.67 (t,  $J = 2.4$  Hz, 1H), 6.52 (t,  $J = 2.4$  Hz, 1H), 3.85 (s, 6H), 3.82 (s, 6H), 3.35 (dd,  $J = 15.2, 6.8$  Hz, 1H), 3.20 (dd,  $J = 16.8, 3.2$  Hz, 1H), 2.94 (dd,  $J = 16.8, 10.4$  Hz, 1H), 2.66 – 2.54 (m, 2H), 1.45 (s, 3H), 1.18 (s, 3H).  $^{13}\text{C}$  NMR (101 MHz,  $\text{CDCl}_3$ )  $\delta$  199.3, 169.7, 160.9, 160.7, 138.8, 136.7, 106.0, 105.4, 105.2, 103.1, 73.5, 55.6, 55.6, 43.0, 41.3, 39.7, 28.7, 22.7. HRMS(ESI): calcd. for  $\text{C}_{24}\text{H}_{30}\text{NO}_5^+$   $[\text{M}+\text{H}]^+$  412.2118; found: 412.2122.

**1-(2,4-Dimethylphenyl)-2-(5-(2,4-dimethylphenyl)-2,2-dimethyl-3,4-dihydro-2H-pyrrol-3-yl)ethan-1-one (5p):** Petroleum ether/ethyl acetate = 4:1; yellow oil (38 mg, 24%);  $^1\text{H}$  NMR (400 MHz,  $\text{CDCl}_3$ )  $\delta$  7.61 (d,  $J = 8.4$  Hz, 1H), 7.25 (d,  $J = 8.0$  Hz, 1H), 7.10 – 7.05 (m, 2H), 7.01 (s, 1H), 6.99 (d,  $J = 8.0$  Hz, 1H), 3.30 - 3.14 (m, 2H), 2.89 (dd,  $J = 16.0, 10.4$  Hz, 1H), 2.63 – 2.56 (m, 2H), 2.49 (s, 3H), 2.43 (s, 3H), 2.36 (s, 3H), 2.31 (s, 3H), 1.43 (s, 3H), 1.16 (s, 3H).  $^{13}\text{C}$  NMR (101 MHz,  $\text{CDCl}_3$ )  $\delta$  203.0, 171.7, 142.1, 138.8, 138.6, 136.5, 134.9, 133.0, 131.9, 128.9, 128.5, 126.4, 126.2, 73.7, 44.5, 43.2, 42.2, 28.8, 22.7, 21.6, 21.4, 21.2, 21.0. HRMS(ESI): calcd. for  $\text{C}_{24}\text{H}_{30}\text{NO}^+$   $[\text{M}+\text{H}]^+$  348.2322; found: 348.2317.

**1-(3,4-Dichlorophenyl)-2-(5-(3,4-dichlorophenyl)-2,2-dimethyl-3,4-dihydro-2H-pyrrol-3-yl)ethan-1-one (5q):** Petroleum ether/ethyl acetate = 4:1; yellow oil (124 mg, 58%);  $^1\text{H}$  NMR (400 MHz,  $\text{CDCl}_3$ )  $\delta$  8.06 (d,  $J = 1.6$  Hz, 1H), 7.92 (d,  $J = 1.6$  Hz, 1H), 7.81 (dd,  $J = 8.4, 2.0$  Hz, 1H), 7.62 (dd,  $J = 8.4, 1.6$  Hz, 1H), 7.58 (d,  $J = 8.4$  Hz, 1H), 7.46 (d,  $J = 8.4$  Hz, 1H), 3.38 (dd,  $J = 16.0, 7.8$  Hz, 1H), 3.21 (dd,  $J = 17.2, 3.6$  Hz, 1H), 2.95 (dd,  $J = 17.2, 10.6$  Hz, 1H), 2.69 – 2.60 (m, 1H), 2.54 (dd,  $J = 16.4, 9.6$  Hz, 1H), 1.45 (s, 3H), 1.19 (s, 3H).  $^{13}\text{C}$  NMR (101 MHz,  $\text{CDCl}_3$ )  $\delta$  197.0, 167.8, 138.0, 136.2, 134.7, 134.4, 133.5, 132.9, 130.9, 130.4, 130.1, 129.4, 127.0, 126.8, 73.8, 42.7, 41.0, 39.5, 28.6, 22.7. HRMS(ESI): calcd. for  $\text{C}_{20}\text{H}_{18}\text{Cl}_4\text{NO}^+$   $[\text{M}+\text{H}]^+$  428.0137; found: 428.0132.

**2-(2,2-Dimethyl-5-(naphthalen-2-yl)-3,4-dihydro-2H-pyrrol-3-yl)-1-(naphthalen-2-yl)ethan-1-one (5r):** Petroleum ether/ethyl acetate = 4:1; yellow oil (119 mg, 61%);  $^1\text{H}$  NMR (400 MHz,  $\text{CDCl}_3$ )  $\delta$  8.52 (s, 1H), 8.15 (s, 1H), 8.08 (t,  $J = 8.0$  Hz, 2H), 7.99 (d,  $J = 8.0$  Hz, 1H), 7.93 (d,  $J = 8.8$  Hz, 1H), 7.90 (d,  $J = 8.0$  Hz, 1H), 7.87 – 7.82 (m, 2H), 7.64 – 7.46 (m, 4H), 3.64 – 3.55 (m, 1H), 3.43 (dd,  $J = 16.8, 3.2$  Hz, 1H), 3.17 (dd,  $J = 16.8, 10.0$  Hz, 1H), 2.84 – 2.71 (m, 2H), 1.53 (s, 3H), 1.29 (s, 3H).  $^{13}\text{C}$  NMR (101 MHz,  $\text{CDCl}_3$ )  $\delta$  199.6, 169.8, 135.7, 134.4, 134.2, 133.0, 132.6, 132.1, 129.8, 129.6, 128.7, 128.7, 128.6, 128.2, 128.1, 127.8, 127.7, 127.0, 126.9, 126.4, 124.5, 123.8, 73.7, 43.1, 41.2, 39.7, 28.9, 23.0. HRMS(ESI): calcd. for  $\text{C}_{28}\text{H}_{26}\text{NO}^+$   $[\text{M}+\text{H}]^+$  392.2009; found: 392.2014.

## Crystal Data

The crystal of **3b** was obtained from CH<sub>2</sub>Cl<sub>2</sub>/petroleum ether at room temperature. The structure of compound **3b** was assigned by single crystal X-ray analysis. Diffraction data were collected on a Bruker Smart Apex II CCD diffractometer with graphite-monochromated Mo K $\alpha$  ( $\lambda = 0.71073$  Å). The crystal data of compound **3b** have been deposited in CCDC with number 2211998.

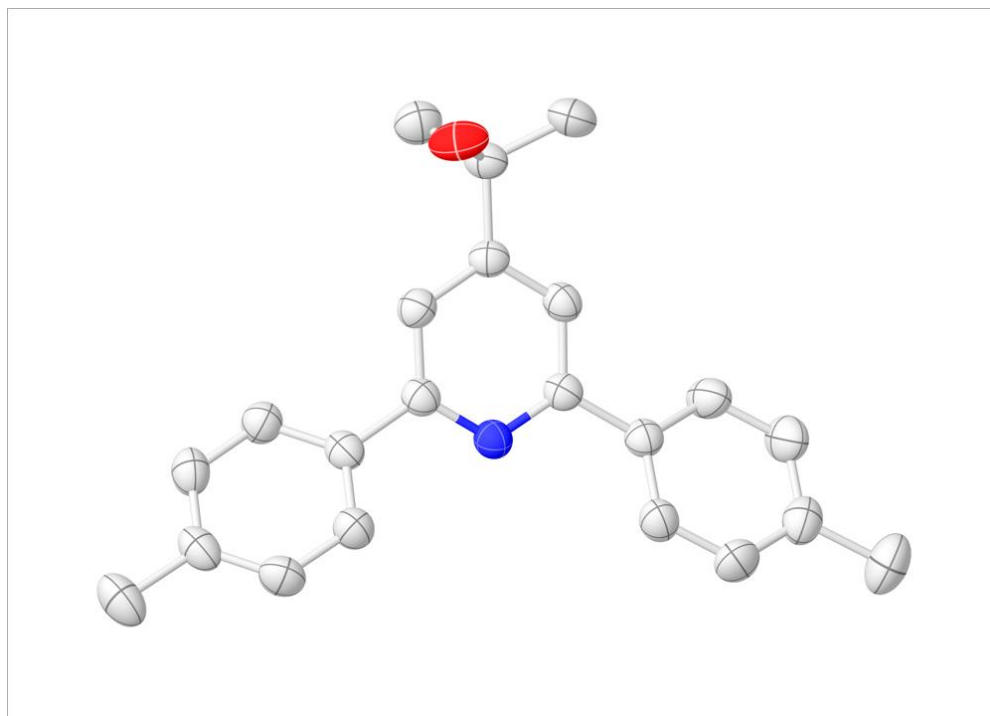

**Figure S1** X-ray structure of compound **3b** (CCDC 2211998) (Thermal ellipsoids are drawn at the 50% probability level).

**Table C1** Crystal data and structure refinement for **3b**

|                     |                                               |
|---------------------|-----------------------------------------------|
| Identification code | <b>3b</b>                                     |
| Empirical formula   | C <sub>22</sub> H <sub>23</sub> NO            |
| Formula weight      | 317.41                                        |
| Temperature/K       | 296.15                                        |
| Crystal system      | orthorhombic                                  |
| Space group         | P2 <sub>1</sub> 2 <sub>1</sub> 2 <sub>1</sub> |
| a/Å                 | 7.408(4)                                      |
| b/Å                 | 12.962(7)                                     |
| c/Å                 | 18.561(11)                                    |
| $\alpha$ /°         | 90                                            |
| $\beta$ /°          | 90                                            |
| $\gamma$ /°         | 90                                            |

|                                             |                                                               |
|---------------------------------------------|---------------------------------------------------------------|
| Volume/Å <sup>3</sup>                       | 1782.2(17)                                                    |
| Z                                           | 4                                                             |
| ρ <sub>calc</sub> /cm <sup>3</sup>          | 1.183                                                         |
| μ/mm <sup>-1</sup>                          | 0.072                                                         |
| F(000)                                      | 680                                                           |
| Crystal size/mm <sup>3</sup>                | 0.15 × 0.15 × 0.1                                             |
| Radiation                                   | MoKα (λ = 0.71073)                                            |
| 2θ range for data collection/°              | 3.832 to 61.03                                                |
| Index ranges                                | -10 ≤ h ≤ 10, -18 ≤ k ≤ 16, -19 ≤ l ≤ 25                      |
| Reflections collected                       | 12522                                                         |
| Independent reflections                     | 4748 [R <sub>int</sub> = 0.0428, R <sub>sigma</sub> = 0.0529] |
| Data/restraints/parameters                  | 4748/0/222                                                    |
| Goodness-of-fit on F <sup>2</sup>           | 1.035                                                         |
| Final R indexes [I >= 2σ (I)]               | R <sub>1</sub> = 0.0495, wR <sub>2</sub> = 0.1181             |
| Final R indexes [all data]                  | R <sub>1</sub> = 0.0752, wR <sub>2</sub> = 0.1321             |
| Largest diff. peak/hole / e Å <sup>-3</sup> | 0.17/-0.19                                                    |
| Flack parameter                             | 0.4(10)                                                       |

**Table C2 Fractional Atomic Coordinates (×10<sup>4</sup>) and Equivalent Isotropic Displacement Parameters (Å<sup>2</sup>×10<sup>3</sup>) for 3b. U<sub>eq</sub> is defined as 1/3 of the trace of the orthogonalised U<sub>ij</sub> tensor.**

| Atom | x        | y           | z           | U(eq)    |
|------|----------|-------------|-------------|----------|
| O2   | -7282(2) | -400.9(14)  | -6174.4(10) | 61.0(5)  |
| N1   | -4732(2) | -3135.9(14) | -4631.3(9)  | 40.0(4)  |
| C1   | -4836(3) | -2234.8(17) | -4271.8(12) | 38.4(5)  |
| C2   | -5085(3) | -1296.3(17) | -4622.2(11) | 41.1(5)  |
| C3   | -5264(3) | -1258.6(16) | -5358.5(11) | 38.4(5)  |
| C4   | -5167(3) | -2195.1(17) | -5726.3(12) | 42.5(5)  |
| C5   | -4892(3) | -3105.4(17) | -5352.9(11) | 39.0(5)  |
| C6   | -4753(3) | -2269.9(17) | -3474.8(11) | 39.6(5)  |
| C7   | -5267(3) | -3144.4(19) | -3098.3(13) | 47.6(5)  |
| C8   | -5305(4) | -3148(2)    | -2355.8(14) | 55.5(6)  |
| C10  | -4317(4) | -1418(2)    | -2337.4(14) | 59.0(7)  |
| C9   | -4853(3) | -2284(2)    | -1960.9(13) | 53.3(6)  |
| C11  | -4240(4) | -1407.6(19) | -3078.6(13) | 53.6(6)  |
| C12  | -4899(5) | -2278(3)    | -1148.7(13) | 81.7(10) |
| C13  | -4820(3) | -4107.2(17) | -5743.6(12) | 41.0(5)  |
| C14  | -4050(3) | -4180.6(19) | -6422.0(12) | 48.1(6)  |
| C15  | -4028(4) | -5113.7(19) | -6791.6(13) | 51.8(6)  |
| C16  | -4791(3) | -5993.5(19) | -6501.8(13) | 50.4(6)  |
| C17  | -5539(4) | -5920(2)    | -5822.1(14) | 54.6(6)  |

|     |          |             |             |         |
|-----|----------|-------------|-------------|---------|
| C18 | -5547(3) | -4996.3(18) | -5444.3(12) | 48.9(6) |
| C19 | -4811(4) | -6997(2)    | -6918.0(17) | 69.2(8) |
| C20 | -5665(3) | -260.1(17)  | -5770.3(12) | 43.2(5) |
| C21 | -5864(4) | 669.6(18)   | -5277.6(14) | 59.0(7) |
| C22 | -4194(4) | -52(2)      | -6317.9(13) | 56.8(7) |

**Table C3 Anisotropic Displacement Parameters ( $\text{\AA}^2 \times 10^3$ ) for 3b. The Anisotropic displacement factor exponent takes the form:  $-2\pi^2[h^2a^*U_{11}+2hka^*b^*U_{12}+\dots]$ .**

| Atom | $U_{11}$ | $U_{22}$ | $U_{33}$ | $U_{23}$  | $U_{13}$  | $U_{12}$ |
|------|----------|----------|----------|-----------|-----------|----------|
| O2   | 56.2(10) | 56.8(11) | 70.1(12) | 22.5(9)   | -20.3(9)  | -7.8(9)  |
| N1   | 41.9(9)  | 38.5(10) | 39.8(10) | -1.6(8)   | -2.6(8)   | 1.0(7)   |
| C1   | 37.0(10) | 37.7(12) | 40.4(11) | -0.3(9)   | -3.9(9)   | 0.3(9)   |
| C2   | 43.5(11) | 37.1(12) | 42.6(12) | -4.5(9)   | -3.8(9)   | 0.2(9)   |
| C3   | 36.0(10) | 37.8(12) | 41.3(12) | 2.7(9)    | -3.5(9)   | -0.2(8)  |
| C4   | 47.0(12) | 43.7(13) | 36.7(11) | 0.6(10)   | -3.8(9)   | 0.0(10)  |
| C5   | 38.5(10) | 37.6(12) | 41.1(12) | -1.1(9)   | -2.4(9)   | 0.9(9)   |
| C6   | 39.1(11) | 40.0(12) | 39.7(11) | -0.2(10)  | -3.4(9)   | 3.7(9)   |
| C7   | 53.5(12) | 43.4(13) | 45.9(13) | -4.2(11)  | 4.7(11)   | -2.6(11) |
| C8   | 62.6(15) | 53.6(16) | 50.2(14) | 7.9(12)   | 11.5(12)  | -5.0(12) |
| C10  | 77.7(18) | 54.4(17) | 45.0(14) | -7.3(12)  | -15.8(13) | -0.7(13) |
| C9   | 52.8(14) | 65.5(17) | 41.5(12) | -3.1(12)  | 0.0(11)   | 7.0(12)  |
| C11  | 71.5(16) | 44.1(14) | 45.2(14) | 1.5(12)   | -12.7(12) | -3.9(12) |
| C12  | 95(2)    | 107(3)   | 43.6(15) | -1.7(16)  | 4.8(15)   | -4(2)    |
| C13  | 41.7(11) | 39.1(12) | 42.1(12) | -3.4(10)  | -7.2(9)   | 3.5(9)   |
| C14  | 54.7(13) | 46.3(14) | 43.4(13) | -0.4(10)  | 1.0(10)   | -4.4(11) |
| C15  | 56.8(14) | 55.8(16) | 42.9(13) | -10.2(12) | 0.0(11)   | 2.6(12)  |
| C16  | 51.3(13) | 41.8(14) | 58.1(14) | -11.6(12) | -9.9(11)  | 6.9(10)  |
| C17  | 65.4(16) | 39.2(14) | 59.2(16) | 1.3(12)   | 1.2(12)   | -5.4(12) |
| C18  | 57.4(14) | 43.1(14) | 46.3(13) | -1.7(11)  | 2.3(11)   | -2.0(10) |
| C19  | 73.9(18) | 52.3(17) | 81(2)    | -21.8(15) | -6.9(16)  | 5.8(14)  |
| C20  | 45.7(12) | 35.9(13) | 48.0(12) | 3.1(10)   | -5.6(10)  | -1.7(9)  |
| C21  | 72.8(17) | 39.4(14) | 64.8(17) | 5.4(12)   | 2.5(14)   | 5.8(11)  |
| C22  | 61.7(15) | 51.7(15) | 56.9(15) | 5.8(13)   | 5.1(13)   | -6.2(12) |

**Table C4 Bond Lengths for 3b.**

| Atom | Atom | Length/ $\text{\AA}$ | Atom | Atom | Length/ $\text{\AA}$ |
|------|------|----------------------|------|------|----------------------|
| O2   | C20  | 1.425(3)             | C8   | C9   | 1.379(4)             |
| N1   | C1   | 1.347(3)             | C10  | C9   | 1.380(4)             |



|    |     |          |  |     |     |          |
|----|-----|----------|--|-----|-----|----------|
| N1 | C5  | 1.345(3) |  | C10 | C11 | 1.377(3) |
| C1 | C2  | 1.392(3) |  | C9  | C12 | 1.508(3) |
| C1 | C6  | 1.481(3) |  | C13 | C14 | 1.386(3) |
| C2 | C3  | 1.374(3) |  | C13 | C18 | 1.388(3) |
| C3 | C4  | 1.394(3) |  | C14 | C15 | 1.391(3) |
| C3 | C20 | 1.532(3) |  | C15 | C16 | 1.382(4) |
| C4 | C5  | 1.383(3) |  | C16 | C17 | 1.381(4) |
| C5 | C13 | 1.488(3) |  | C16 | C19 | 1.513(3) |
| C6 | C7  | 1.385(3) |  | C17 | C18 | 1.388(3) |
| C6 | C11 | 1.391(3) |  | C20 | C21 | 1.520(3) |
| C7 | C8  | 1.378(3) |  | C20 | C22 | 1.514(3) |

**Table C5 Bond Angles for 3b**

| Atom | Atom | Atom | Angle/°    | Atom | Atom | Atom | Angle/°    |
|------|------|------|------------|------|------|------|------------|
| C5   | N1   | C1   | 117.56(19) | C8   | C9   | C12  | 122.0(3)   |
| N1   | C1   | C2   | 122.26(19) | C10  | C9   | C12  | 120.6(3)   |
| N1   | C1   | C6   | 117.75(19) | C10  | C11  | C6   | 120.6(2)   |
| C2   | C1   | C6   | 119.94(19) | C14  | C13  | C5   | 121.2(2)   |
| C3   | C2   | C1   | 120.6(2)   | C14  | C13  | C18  | 117.8(2)   |
| C2   | C3   | C4   | 116.8(2)   | C18  | C13  | C5   | 121.0(2)   |
| C2   | C3   | C20  | 123.0(2)   | C13  | C14  | C15  | 120.9(2)   |
| C4   | C3   | C20  | 120.08(19) | C16  | C15  | C14  | 121.4(2)   |
| C5   | C4   | C3   | 120.3(2)   | C15  | C16  | C19  | 121.0(2)   |
| N1   | C5   | C4   | 122.5(2)   | C17  | C16  | C15  | 117.6(2)   |
| N1   | C5   | C13  | 117.1(2)   | C17  | C16  | C19  | 121.4(2)   |
| C4   | C5   | C13  | 120.36(19) | C16  | C17  | C18  | 121.5(2)   |
| C7   | C6   | C1   | 121.2(2)   | C17  | C18  | C13  | 120.8(2)   |
| C7   | C6   | C11  | 117.8(2)   | O2   | C20  | C3   | 108.49(17) |
| C11  | C6   | C1   | 121.0(2)   | O2   | C20  | C21  | 109.7(2)   |
| C8   | C7   | C6   | 120.8(2)   | O2   | C20  | C22  | 105.93(19) |
| C7   | C8   | C9   | 121.6(2)   | C21  | C20  | C3   | 112.85(19) |
| C11  | C10  | C9   | 121.7(2)   | C22  | C20  | C3   | 110.26(19) |
| C8   | C9   | C10  | 117.4(2)   | C22  | C20  | C21  | 109.4(2)   |

**Table C6 Torsion Angles for 3b**

| A | B | C | D | Angle/° | A | B | C | D | Angle/° |
|---|---|---|---|---------|---|---|---|---|---------|
|---|---|---|---|---------|---|---|---|---|---------|

|    |    |     |     |             |     |     |     |     |             |
|----|----|-----|-----|-------------|-----|-----|-----|-----|-------------|
| N1 | C1 | C2  | C3  | 1.0(3)      | C4  | C5  | C13 | C18 | -143.1(2)   |
| N1 | C1 | C6  | C7  | -25.3(3)    | C5  | N1  | C1  | C2  | -0.5(3)     |
| N1 | C1 | C6  | C11 | 158.0(2)    | C5  | N1  | C1  | C6  | 177.0(2)    |
| N1 | C5 | C13 | C14 | -145.9(2)   | C5  | C13 | C14 | C15 | -178.3(2)   |
| N1 | C5 | C13 | C18 | 35.1(3)     | C5  | C13 | C18 | C17 | 177.5(2)    |
| C1 | N1 | C5  | C4  | -0.4(3)     | C6  | C1  | C2  | C3  | -176.4(2)   |
| C1 | N1 | C5  | C13 | -178.57(18) | C6  | C7  | C8  | C9  | 0.7(4)      |
| C1 | C2 | C3  | C4  | -0.5(3)     | C7  | C6  | C11 | C10 | -2.6(4)     |
| C1 | C2 | C3  | C20 | 175.86(19)  | C7  | C8  | C9  | C10 | -1.5(4)     |
| C1 | C6 | C7  | C8  | -175.5(2)   | C7  | C8  | C9  | C12 | 179.7(3)    |
| C1 | C6 | C11 | C10 | 174.3(2)    | C9  | C10 | C11 | C6  | 1.7(4)      |
| C2 | C1 | C6  | C7  | 152.3(2)    | C11 | C6  | C7  | C8  | 1.4(4)      |
| C2 | C1 | C6  | C11 | -24.5(3)    | C11 | C10 | C9  | C8  | 0.3(4)      |
| C2 | C3 | C4  | C5  | -0.4(3)     | C11 | C10 | C9  | C12 | 179.1(3)    |
| C2 | C3 | C20 | O2  | -122.5(2)   | C13 | C14 | C15 | C16 | 0.9(4)      |
| C2 | C3 | C20 | C21 | -0.8(3)     | C14 | C13 | C18 | C17 | -1.6(3)     |
| C2 | C3 | C20 | C22 | 121.9(2)    | C14 | C15 | C16 | C17 | -1.6(4)     |
| C3 | C4 | C5  | N1  | 0.9(3)      | C14 | C15 | C16 | C19 | 178.1(2)    |
| C3 | C4 | C5  | C13 | 179.0(2)    | C15 | C16 | C17 | C18 | 0.7(4)      |
| C4 | C3 | C20 | O2  | 53.8(3)     | C16 | C17 | C18 | C13 | 0.8(4)      |
| C4 | C3 | C20 | C21 | 175.5(2)    | C18 | C13 | C14 | C15 | 0.7(3)      |
| C4 | C3 | C20 | C22 | -61.8(3)    | C19 | C16 | C17 | C18 | -179.0(2)   |
| C4 | C5 | C13 | C14 | 36.0(3)     | C20 | C3  | C4  | C5  | -176.88(19) |

**Table C7 Hydrogen Atom Coordinates ( $\text{\AA}\times 10^4$ ) and Isotropic Displacement Parameters ( $\text{\AA}^2\times 10^3$ ) for 3b**

| Atom | <i>x</i> | <i>y</i> | <i>z</i> | U(eq) |
|------|----------|----------|----------|-------|
| H2   | -8037    | -692     | -5924    | 92    |
| H2A  | -5131    | -689     | -4356    | 49    |
| H4   | -5288    | -2208    | -6225    | 51    |
| H7   | -5591    | -3737    | -3350    | 57    |
| H8   | -5643    | -3747    | -2115    | 67    |
| H10  | -4000    | -826     | -2084    | 71    |
| H11  | -3843    | -818     | -3316    | 64    |
| H12A | -3731    | -2463    | -965     | 123   |
| H12B | -5779    | -2767    | -983     | 123   |
| H12C | -5216    | -1601    | -981     | 123   |
| H14  | -3541    | -3598    | -6633    | 58    |
| H15  | -3488    | -5146    | -7243    | 62    |
| H17  | -6048    | -6503    | -5613    | 66    |

|      |       |       |       |     |
|------|-------|-------|-------|-----|
| H18  | -6046 | -4973 | -4985 | 59  |
| H19A | -4044 | -6937 | -7333 | 104 |
| H19B | -6021 | -7147 | -7070 | 104 |
| H19C | -4380 | -7545 | -6615 | 104 |
| H21A | -6786 | 535   | -4926 | 89  |
| H21B | -6194 | 1263  | -5558 | 89  |
| H21C | -4739 | 798   | -5037 | 89  |
| H22A | -4514 | 540   | -6602 | 85  |
| H22B | -4059 | -641  | -6627 | 85  |
| H22C | -3076 | 79    | -6072 | 85  |

<sup>1</sup>H NMR of Compound **3a** (400 MHz, CDCl<sub>3</sub>)

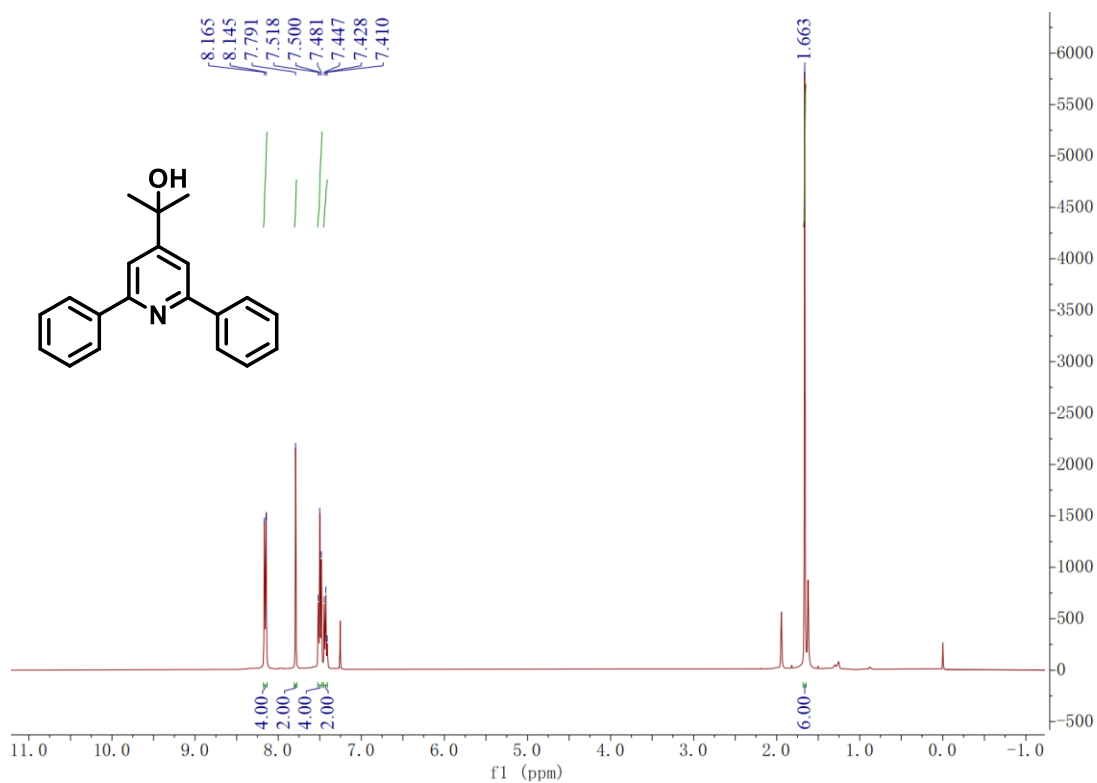

<sup>13</sup>C NMR of Compound **3a** (101 MHz, CDCl<sub>3</sub>)

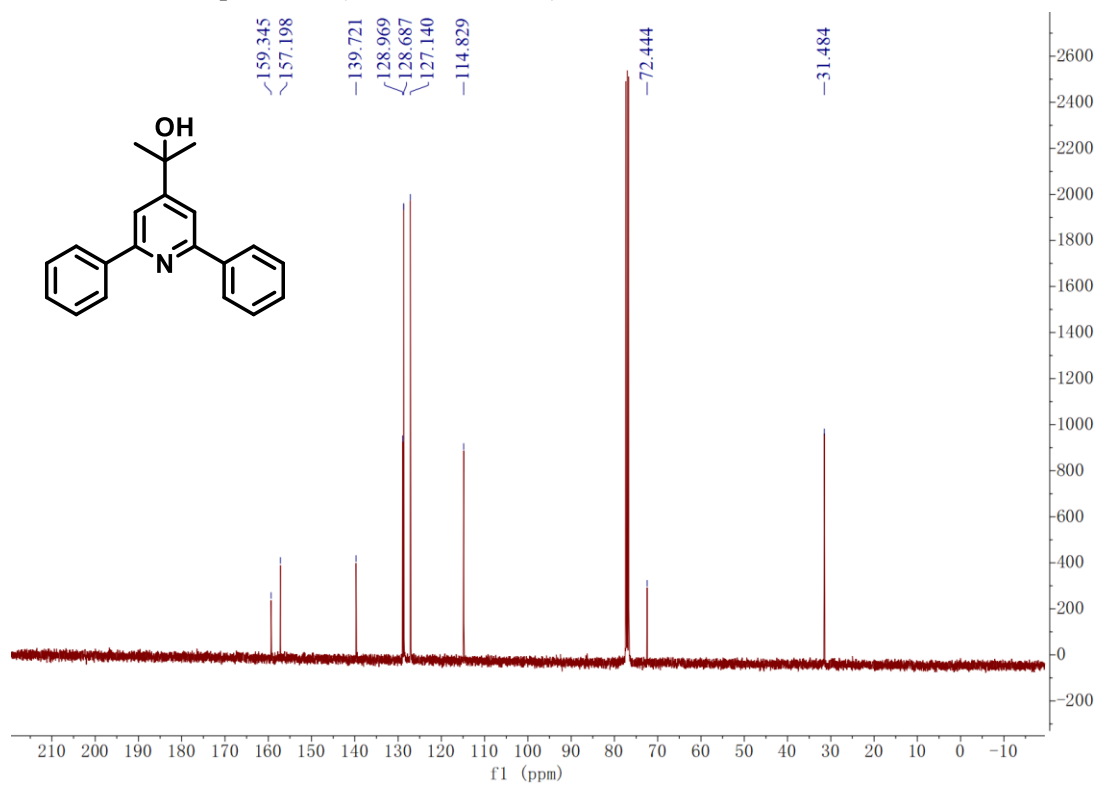

**<sup>1</sup>H NMR of Compound 3b (400 MHz, CDCl<sub>3</sub>)**

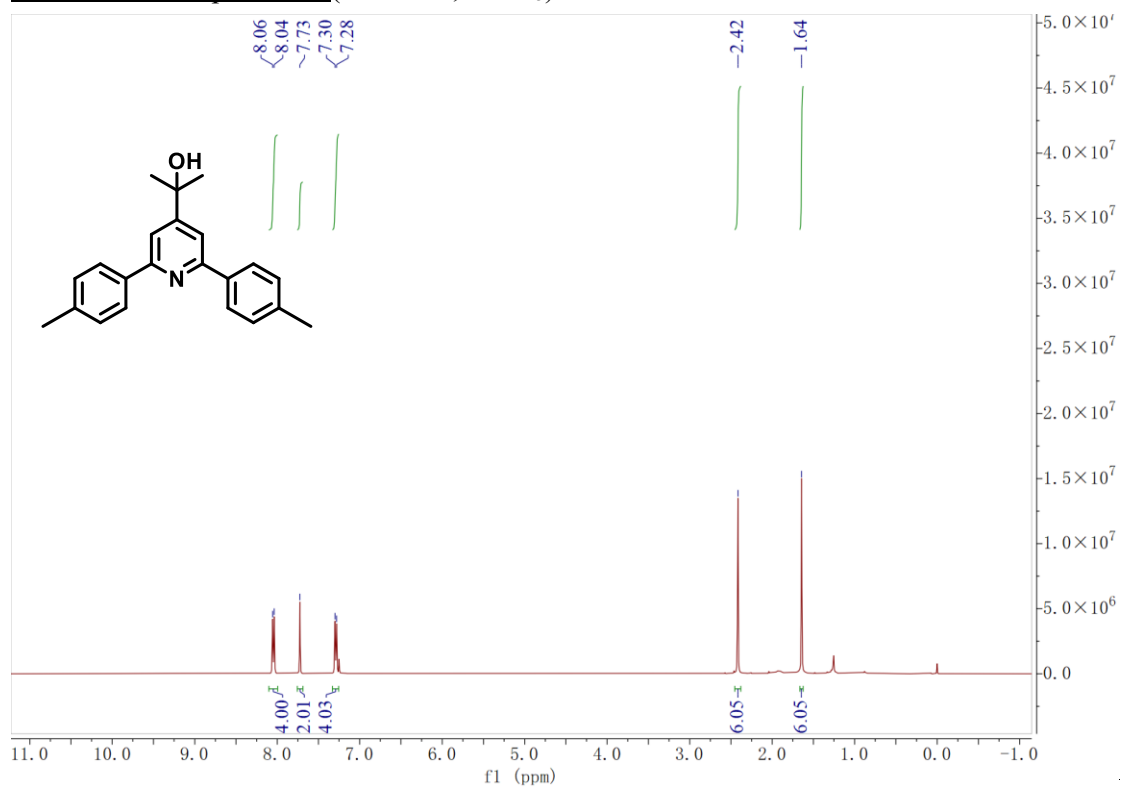

**<sup>13</sup>C NMR of Compound 3b (101 MHz, CDCl<sub>3</sub>)**

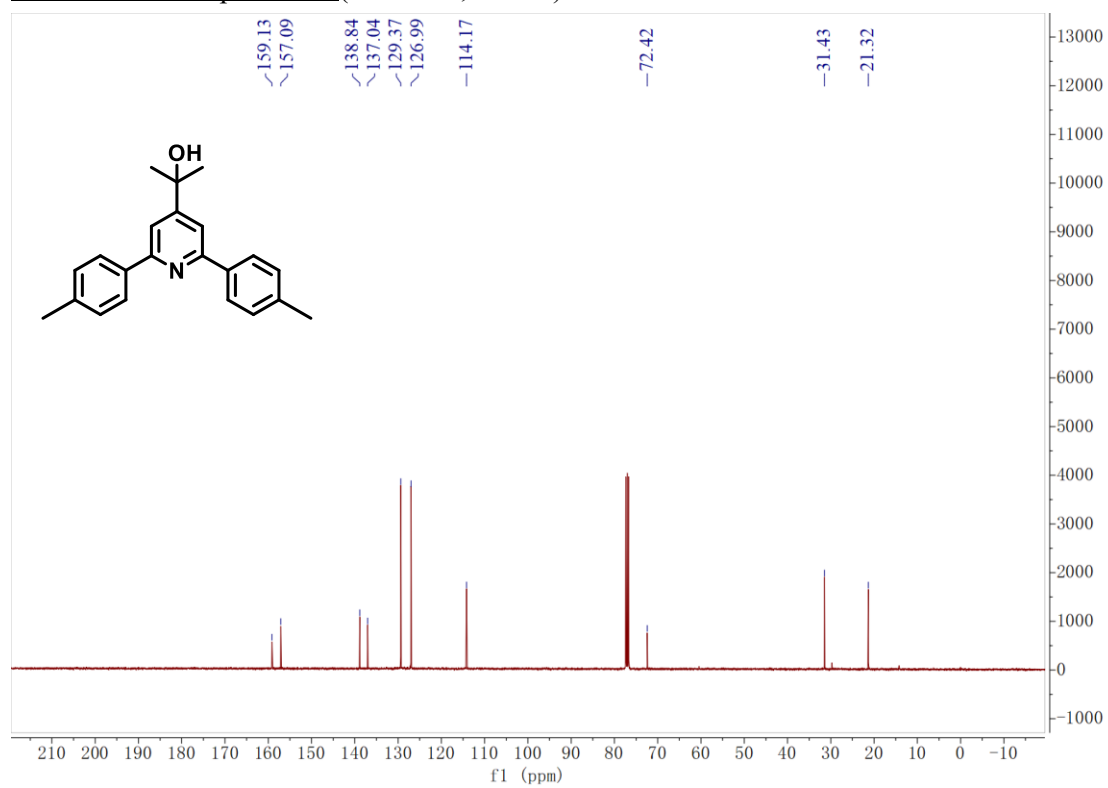

<sup>1</sup>H NMR of Compound **3c** (400 MHz, CDCl<sub>3</sub>)

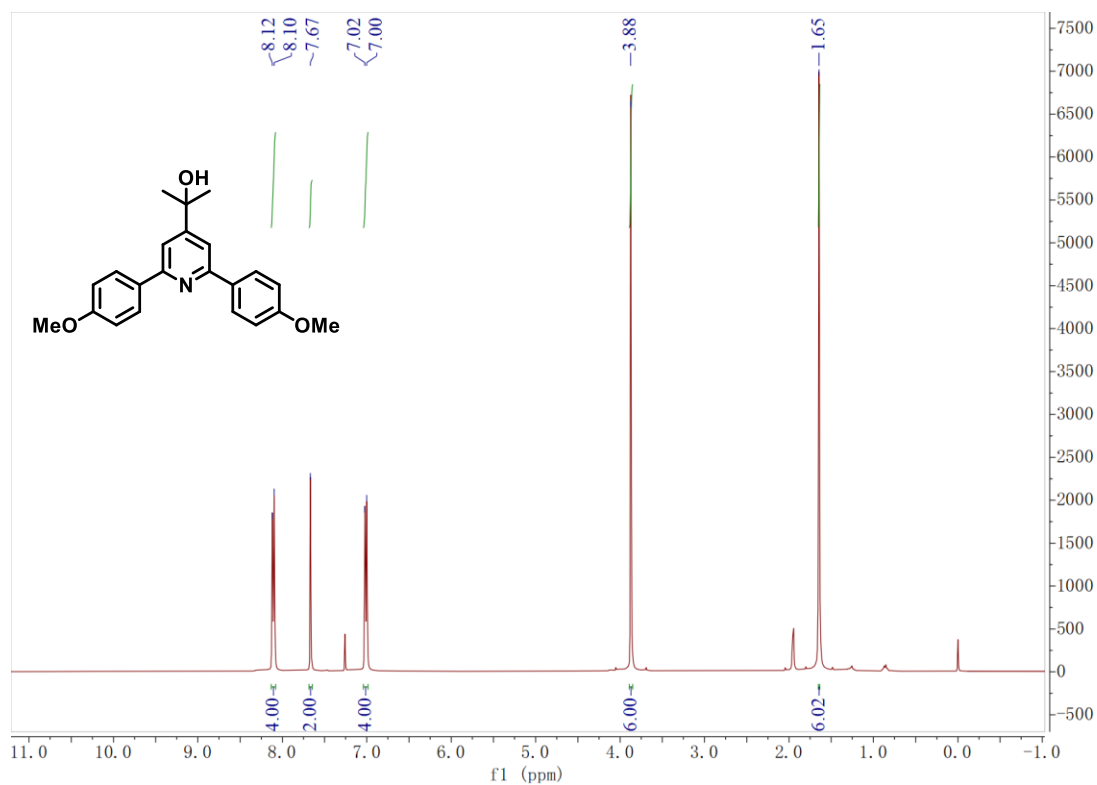

<sup>13</sup>C NMR of Compound **3c** (101 MHz, CDCl<sub>3</sub>)

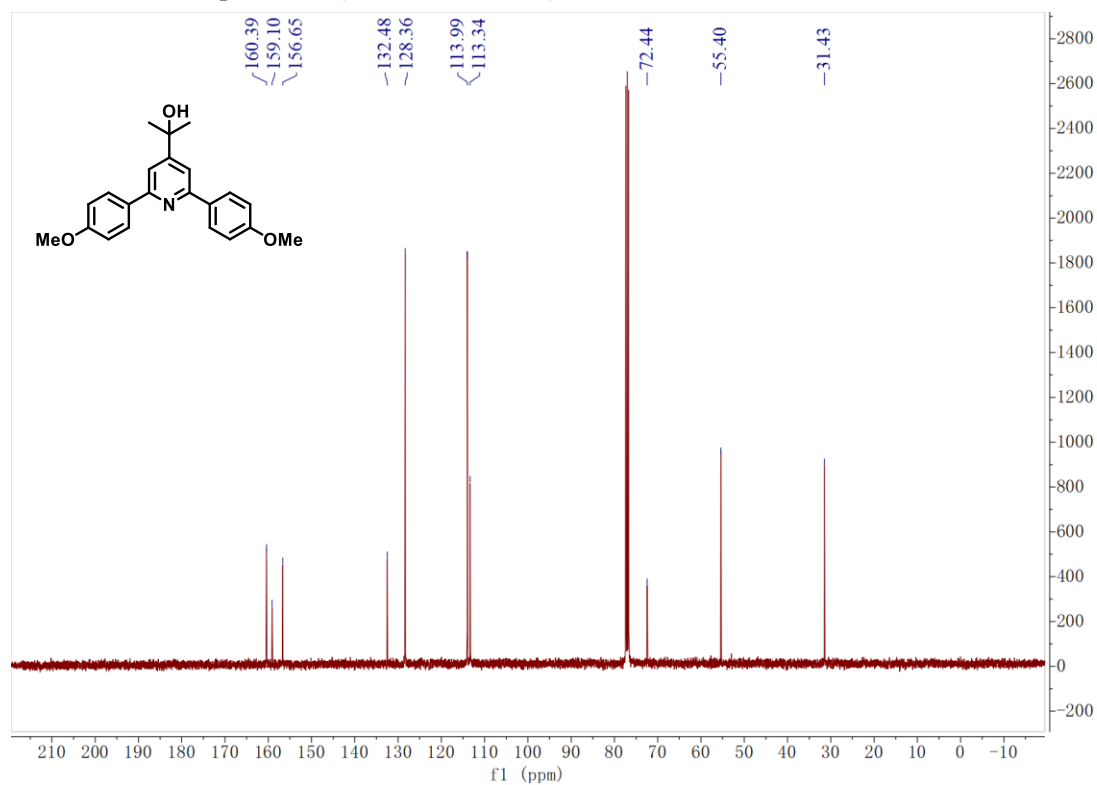

<sup>1</sup>H NMR of Compound **3d** (400 MHz, CDCl<sub>3</sub>)

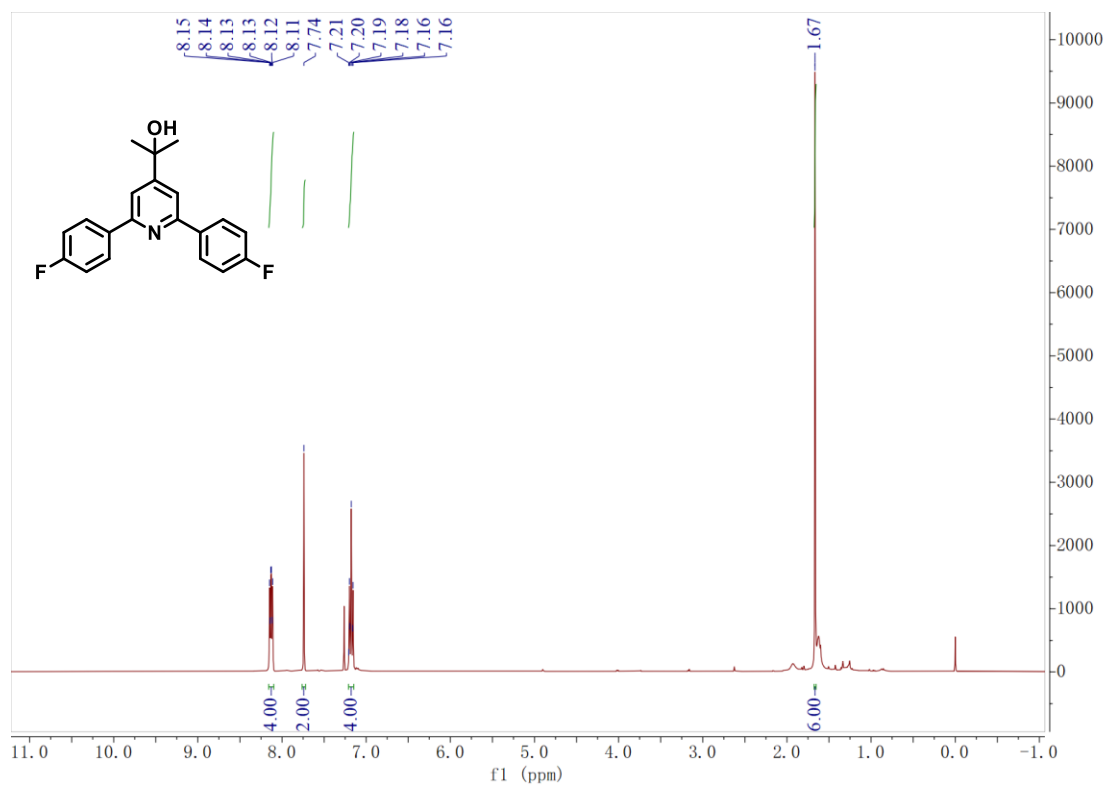

<sup>13</sup>C NMR of Compound **3d** (101 MHz, CDCl<sub>3</sub>)

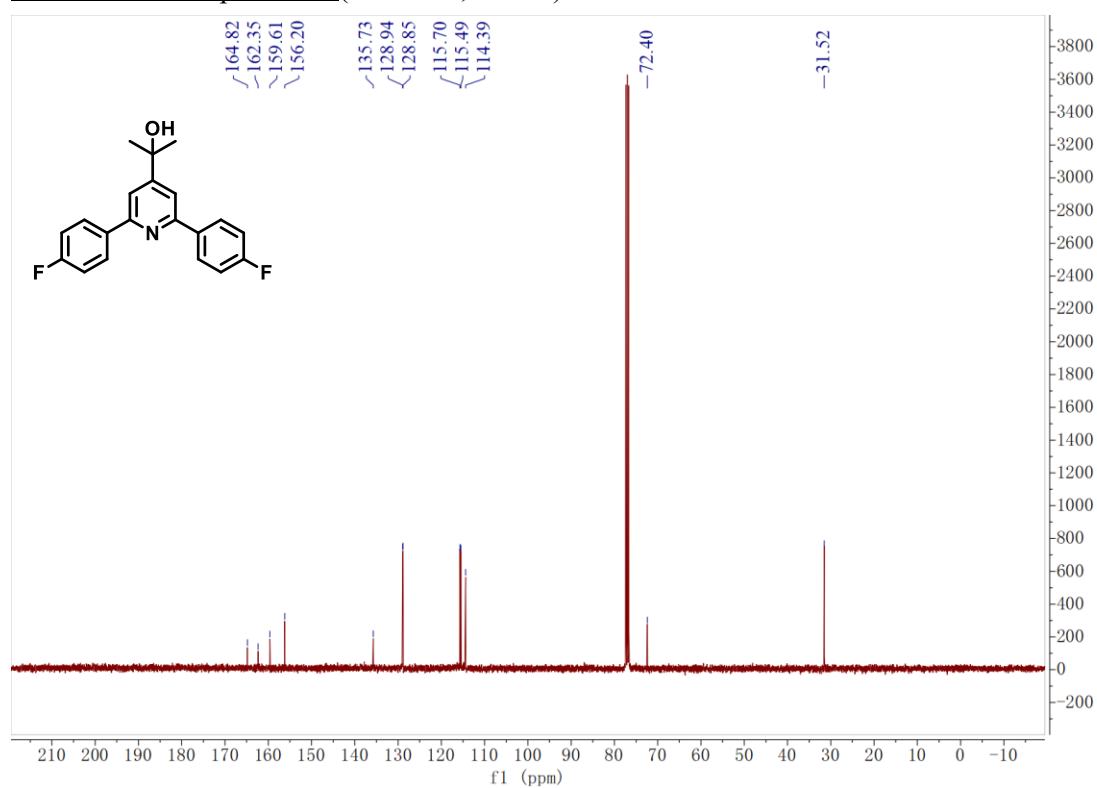

<sup>1</sup>H NMR of Compound **3e** (400 MHz, CDCl<sub>3</sub>)

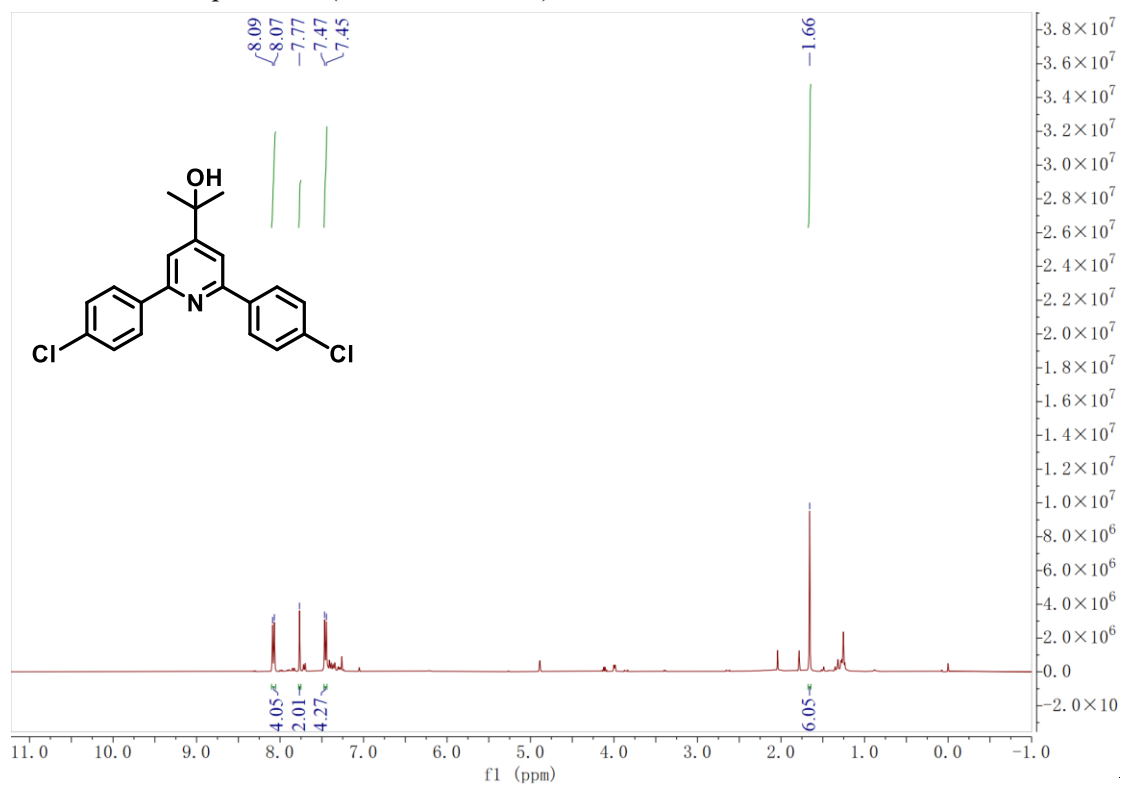

<sup>13</sup>C NMR of Compound **3e** (101 MHz, CDCl<sub>3</sub>)

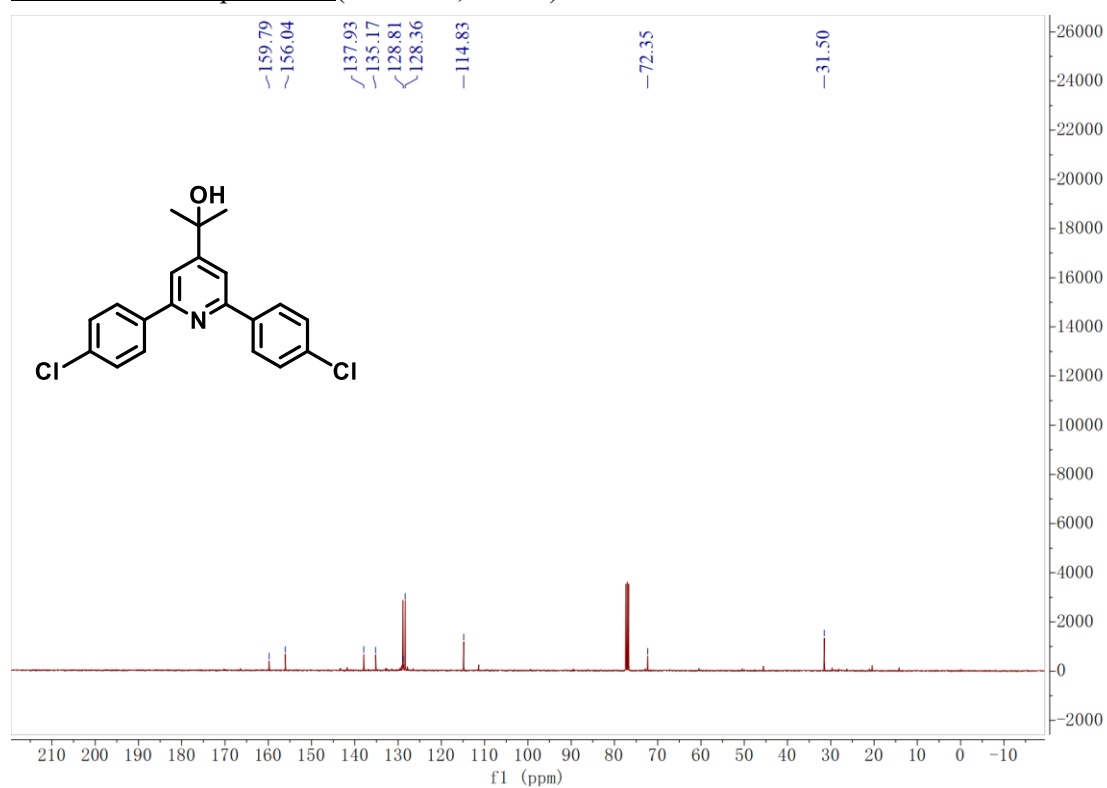



<sup>1</sup>H NMR of Compound **3f** (400 MHz, CDCl<sub>3</sub>)

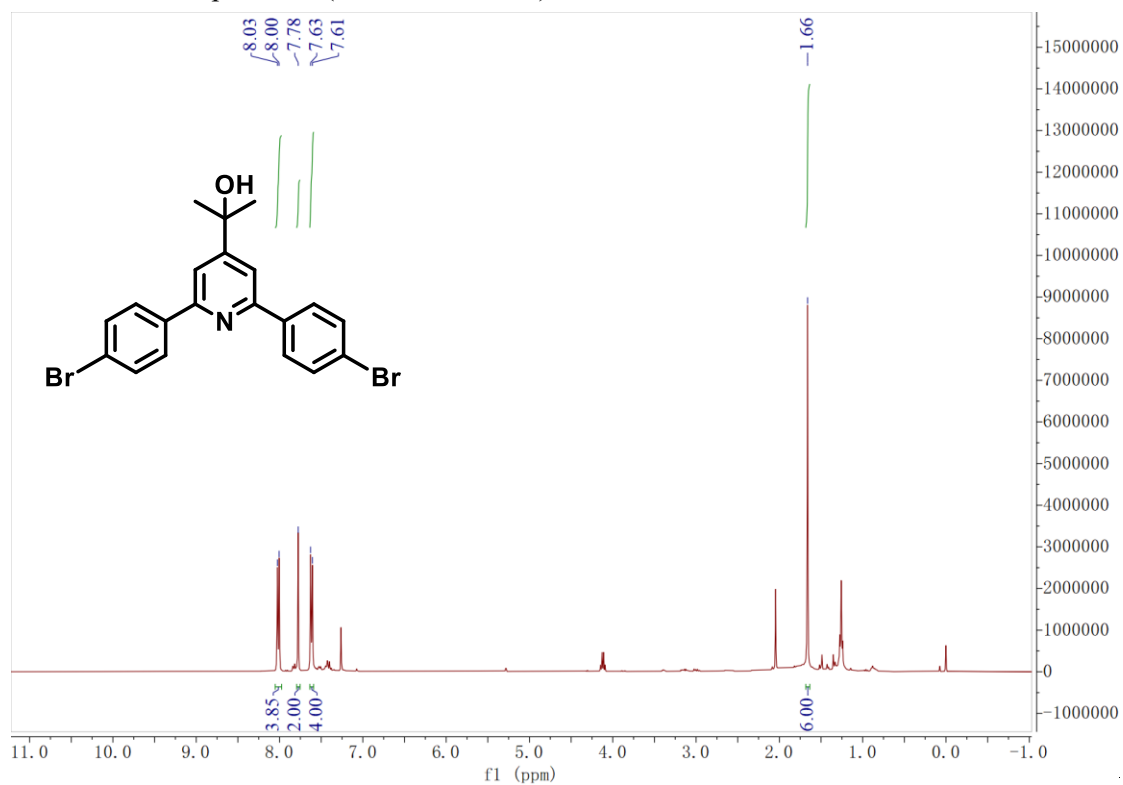

<sup>13</sup>C NMR of Compound **3f** (101 MHz, CDCl<sub>3</sub>)

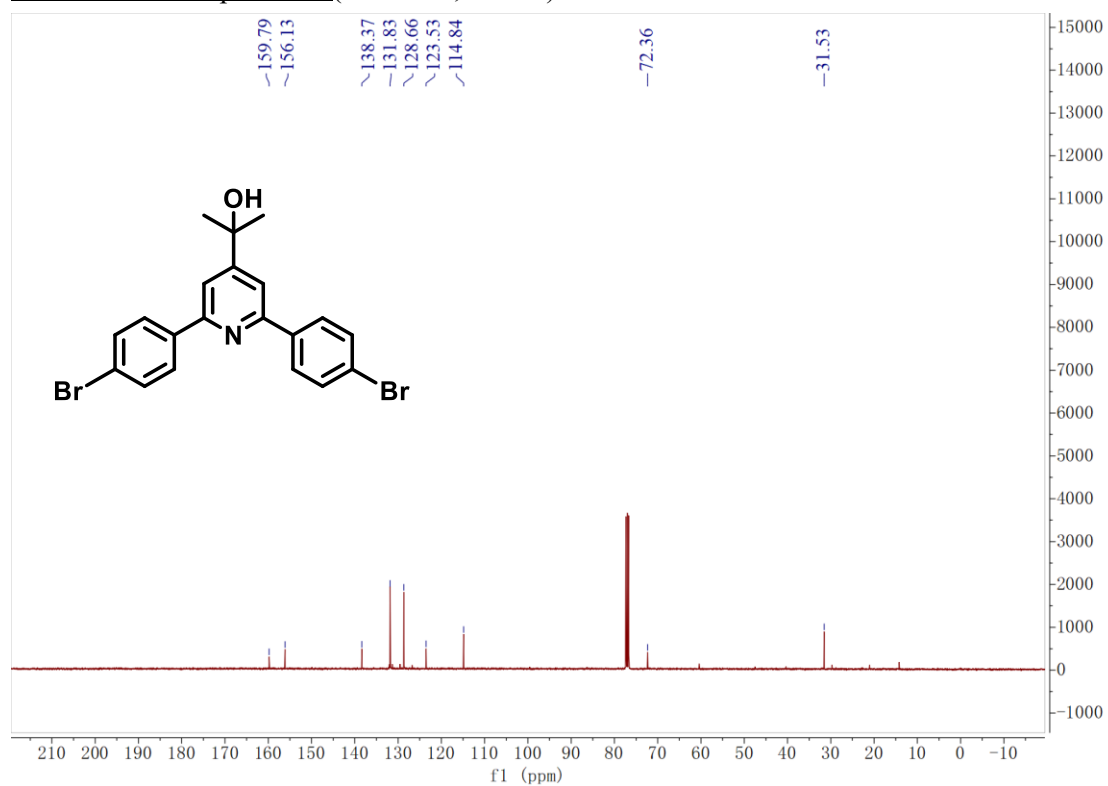

<sup>1</sup>H NMR of Compound **3g** (400 MHz, CDCl<sub>3</sub>)

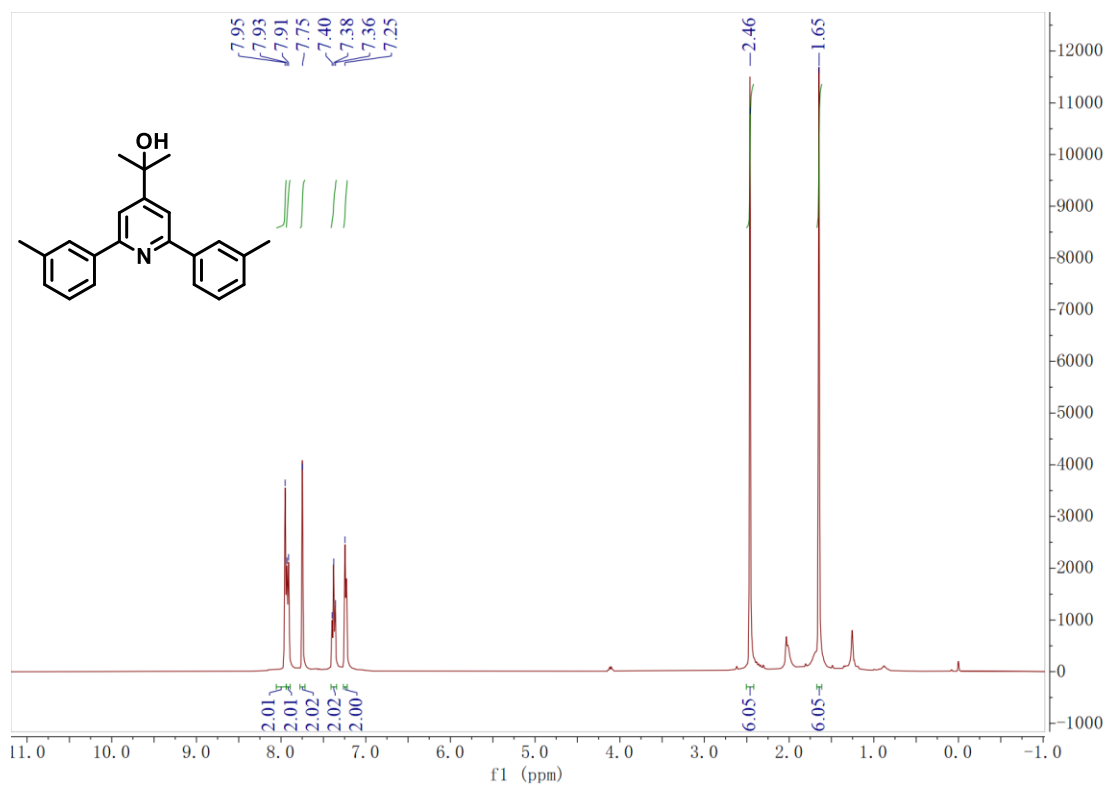

<sup>13</sup>C NMR of Compound **3g** (101 MHz, CDCl<sub>3</sub>)

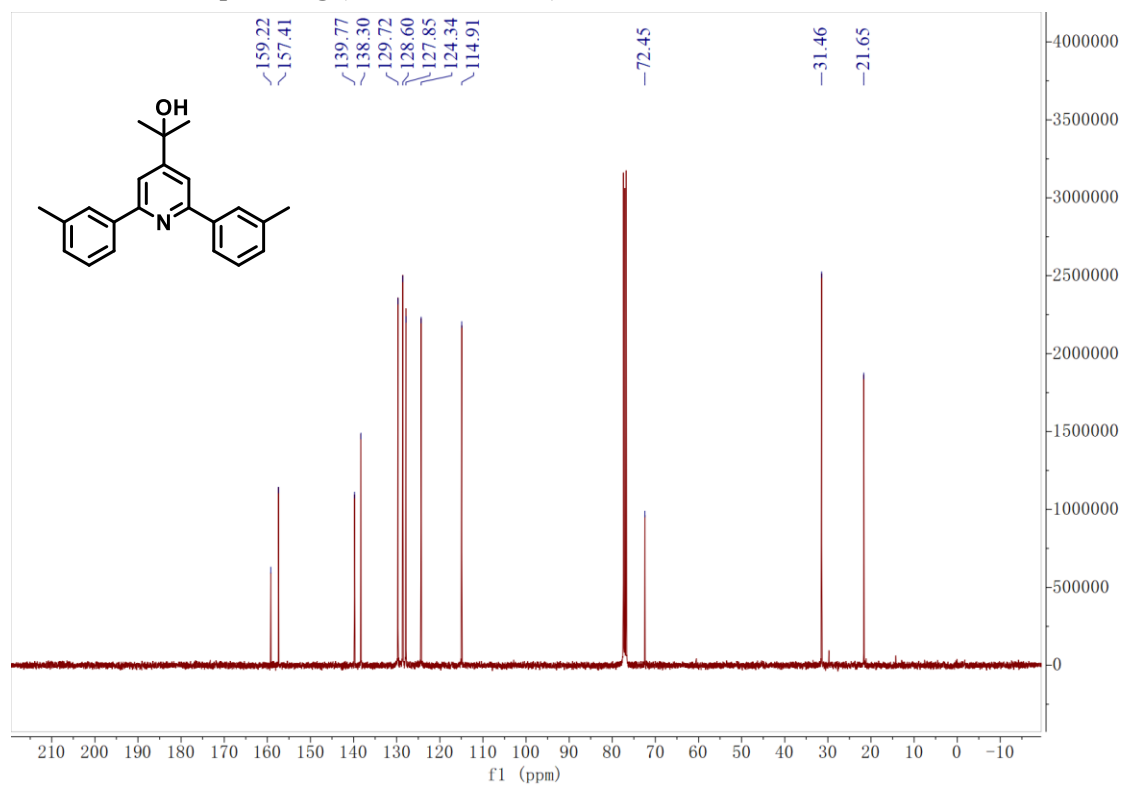

<sup>1</sup>H NMR of Compound **3h** (400 MHz, CDCl<sub>3</sub>)

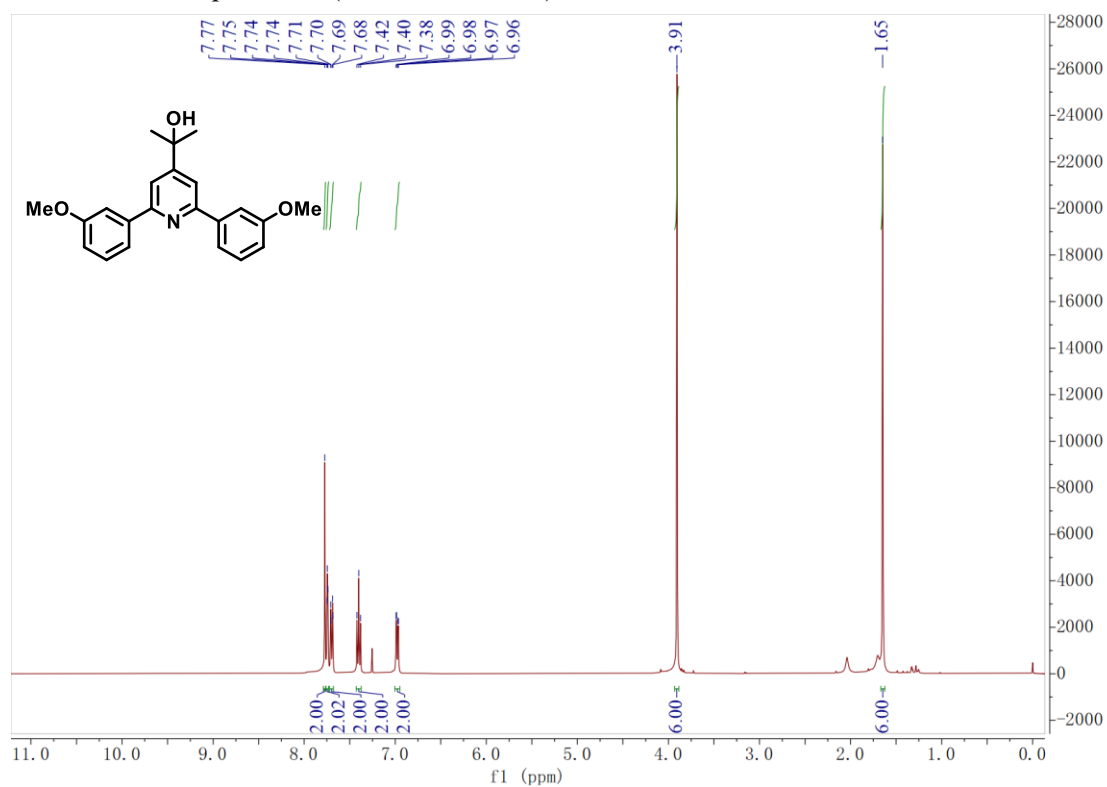

<sup>13</sup>C NMR of Compound **3h** (101 MHz, CDCl<sub>3</sub>)

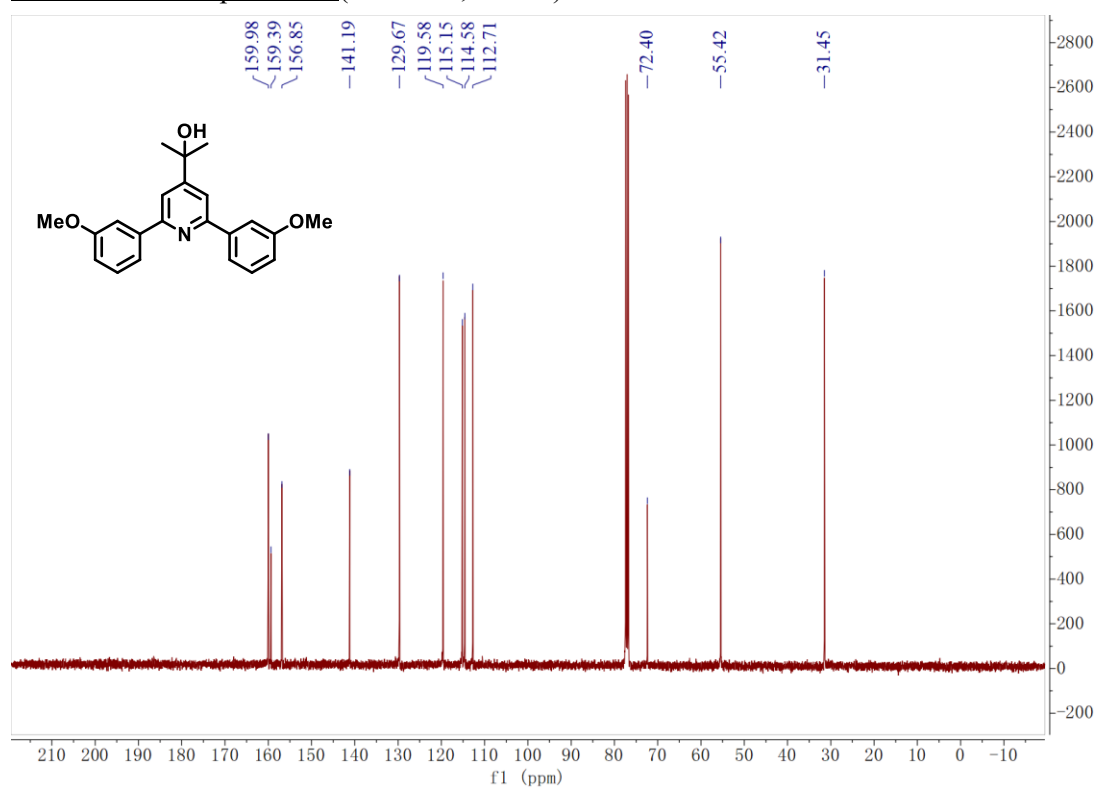

**<sup>1</sup>H NMR of Compound 3i (400 MHz, CDCl<sub>3</sub>)**

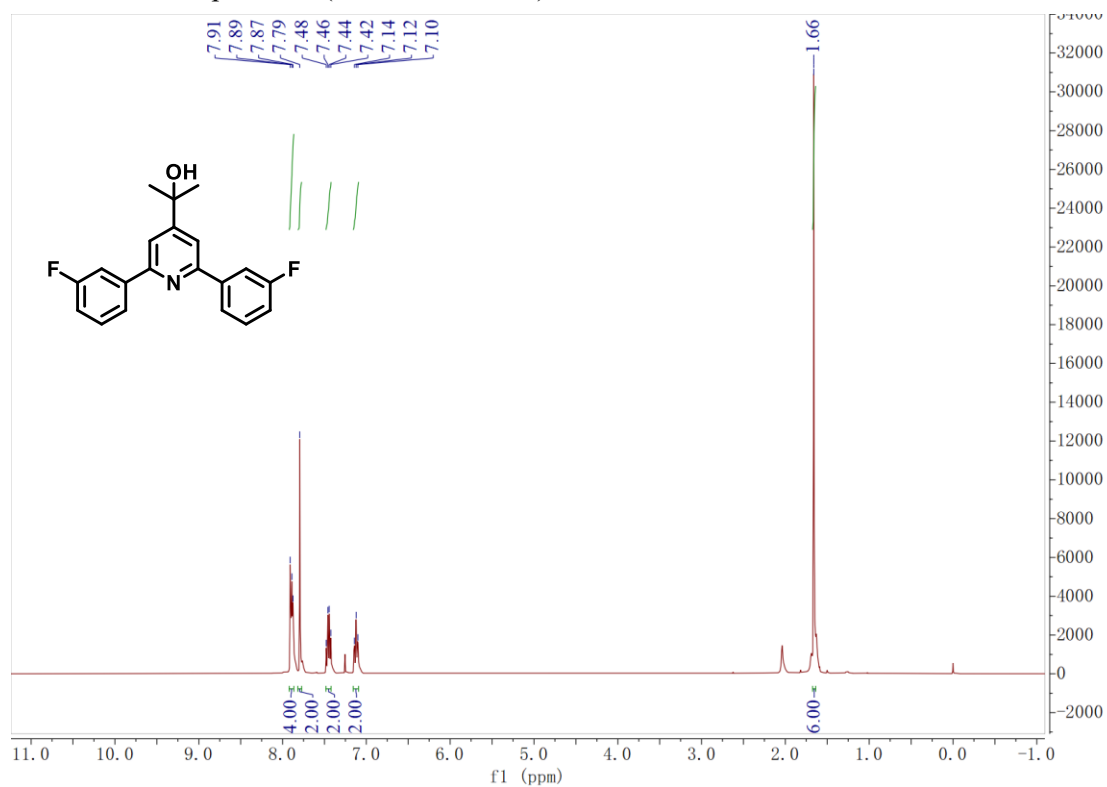

**<sup>13</sup>C NMR of Compound 3i (101 MHz, CDCl<sub>3</sub>)**

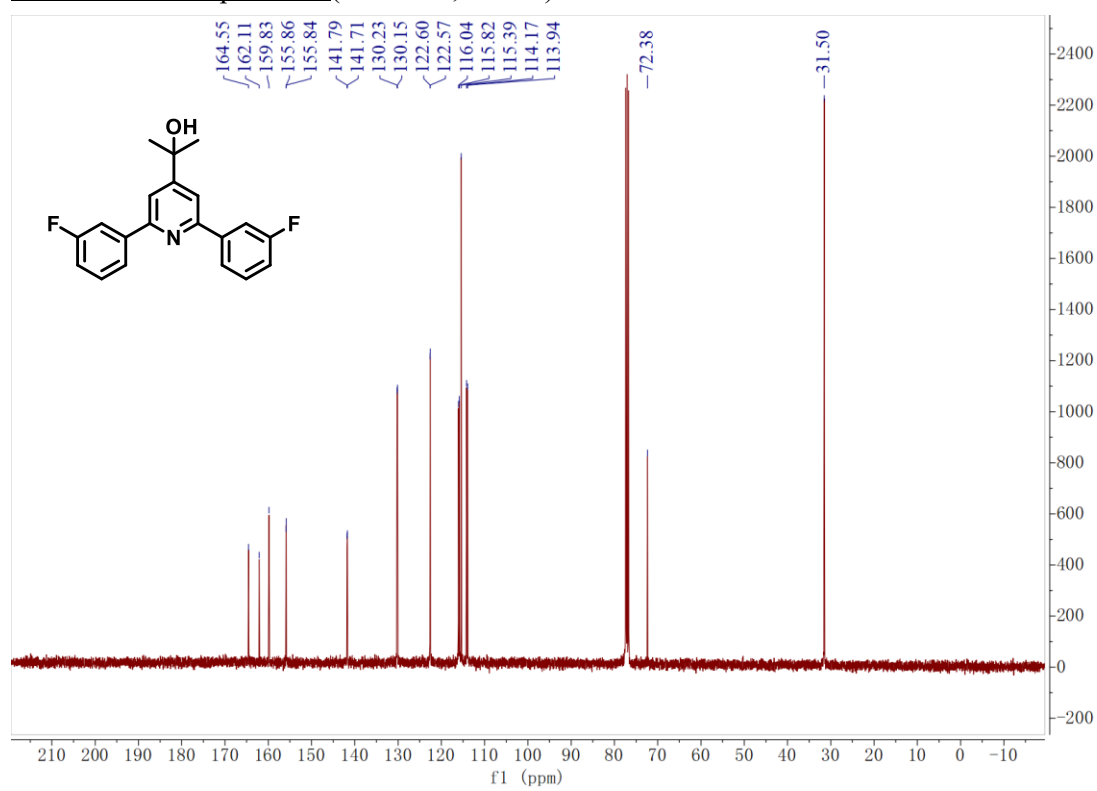

<sup>1</sup>H NMR of Compound **3j** (400 MHz, CDCl<sub>3</sub>)

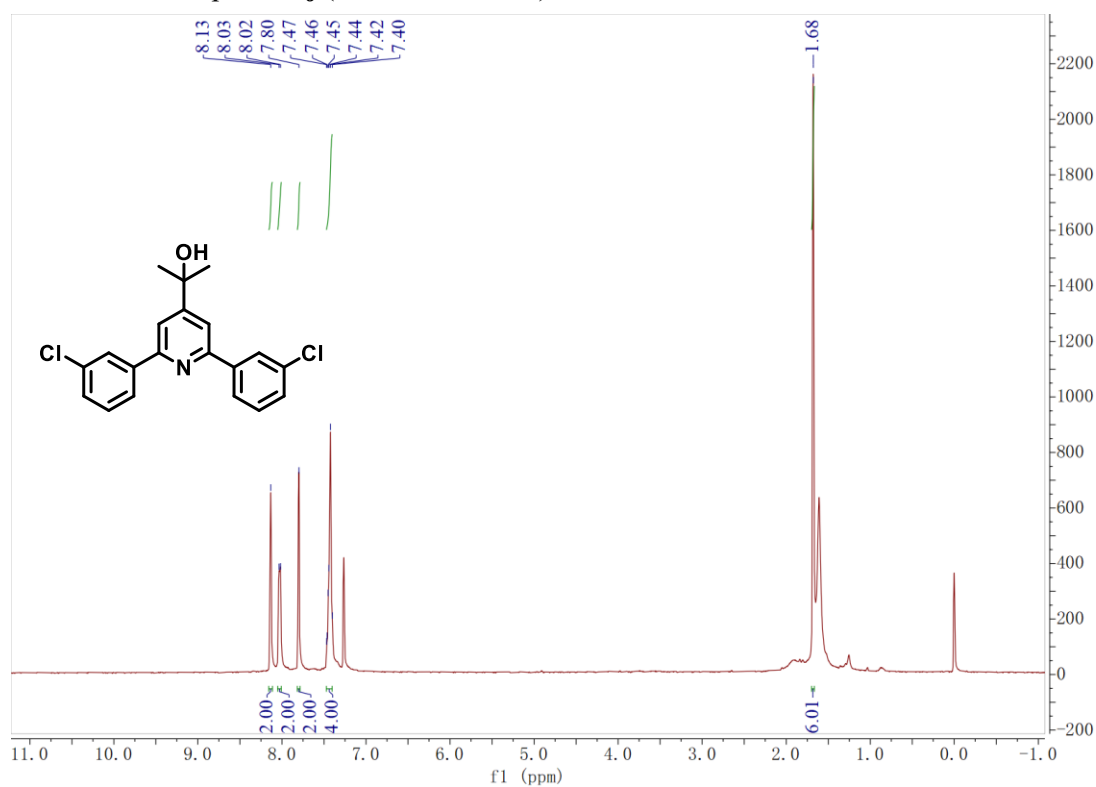

<sup>13</sup>C NMR of Compound **3j** (101 MHz, CDCl<sub>3</sub>)

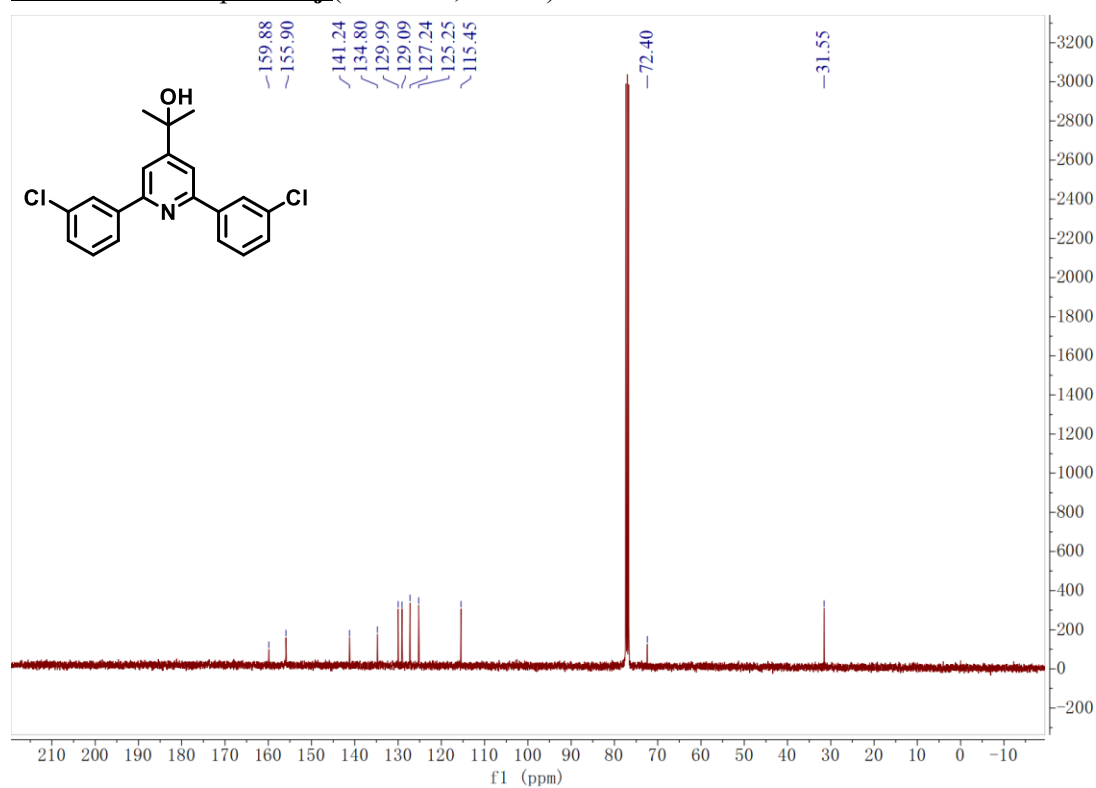

<sup>1</sup>H NMR of Compound **3k** (400 MHz, CDCl<sub>3</sub>)

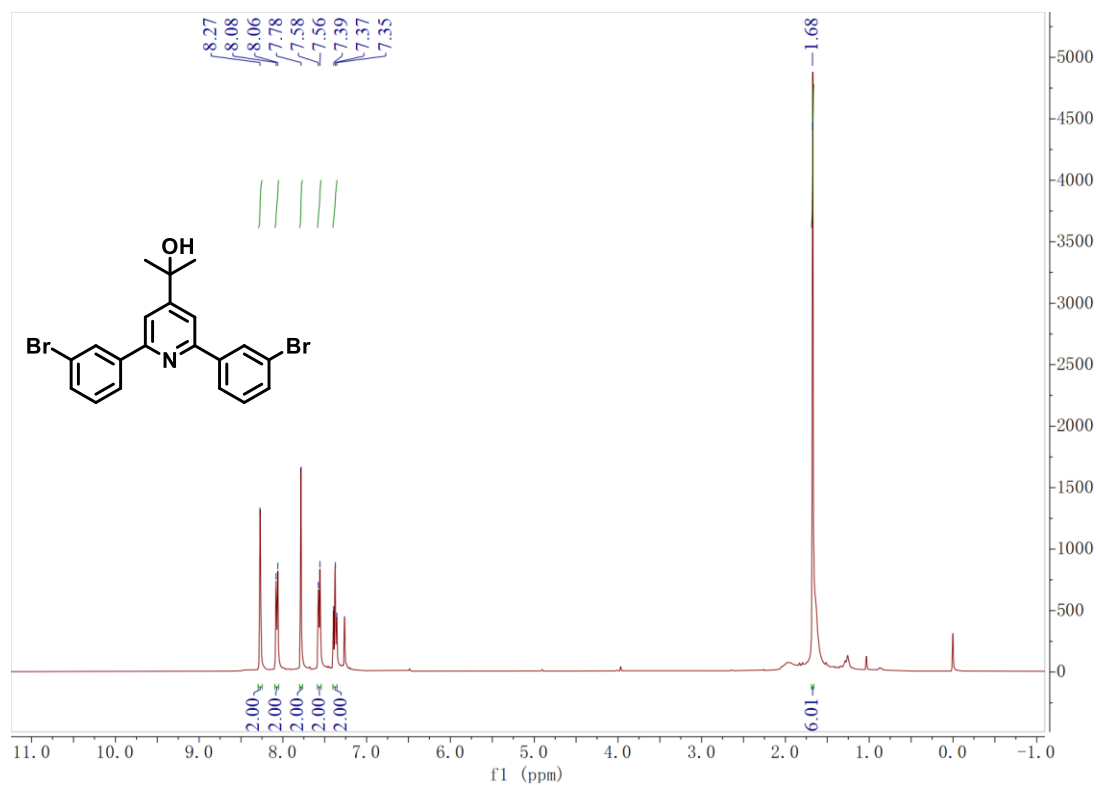

<sup>13</sup>C NMR of Compound **3k** (101 MHz, CDCl<sub>3</sub>)

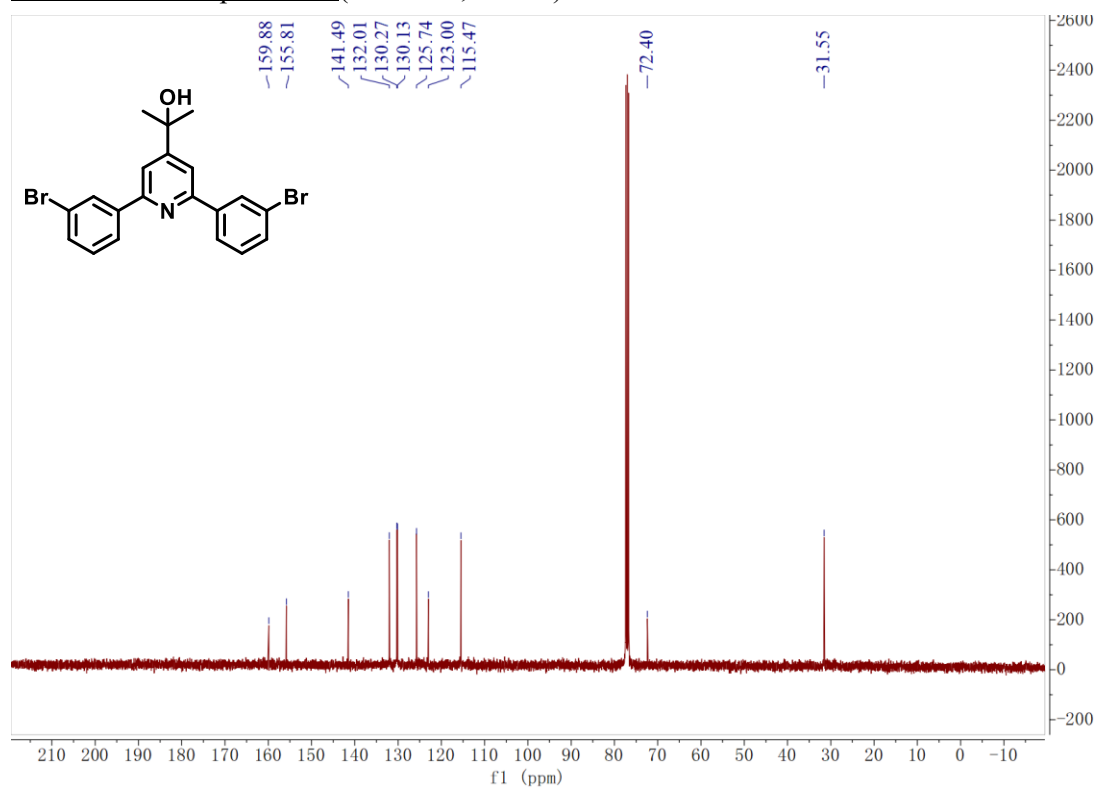

<sup>1</sup>H NMR of Compound **31** (400 MHz, CDCl<sub>3</sub>)

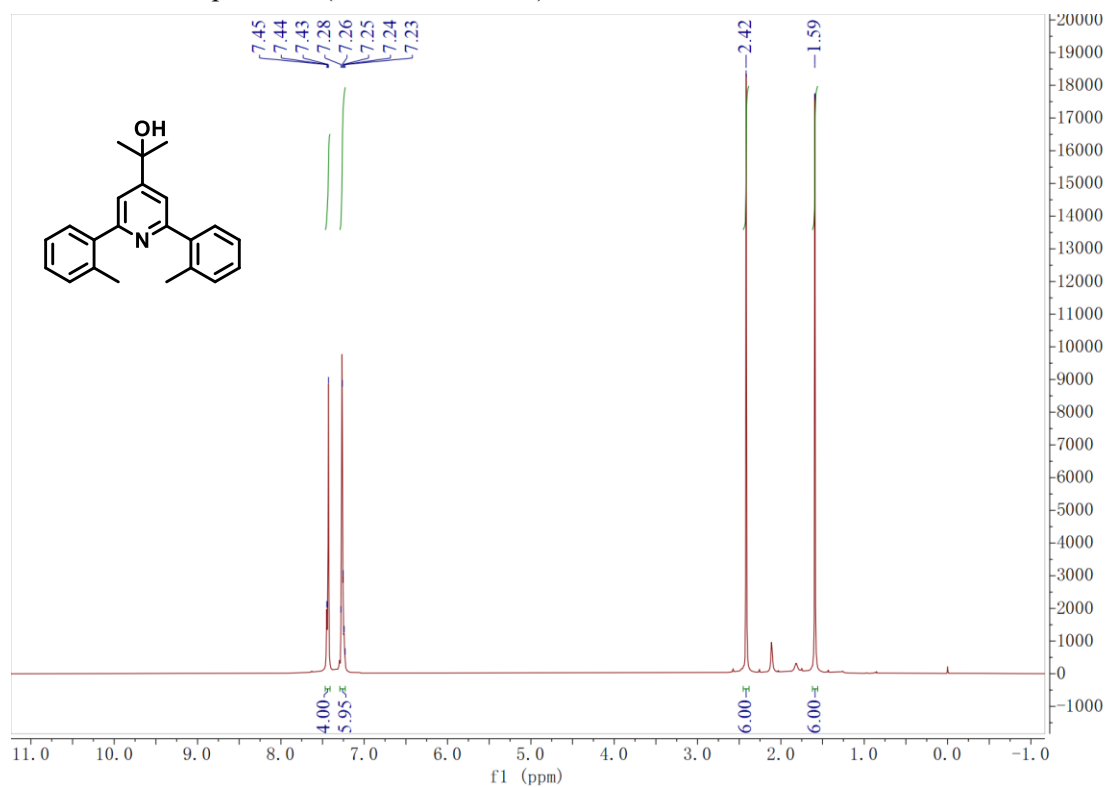

<sup>13</sup>C NMR of Compound **31** (101 MHz, CDCl<sub>3</sub>)

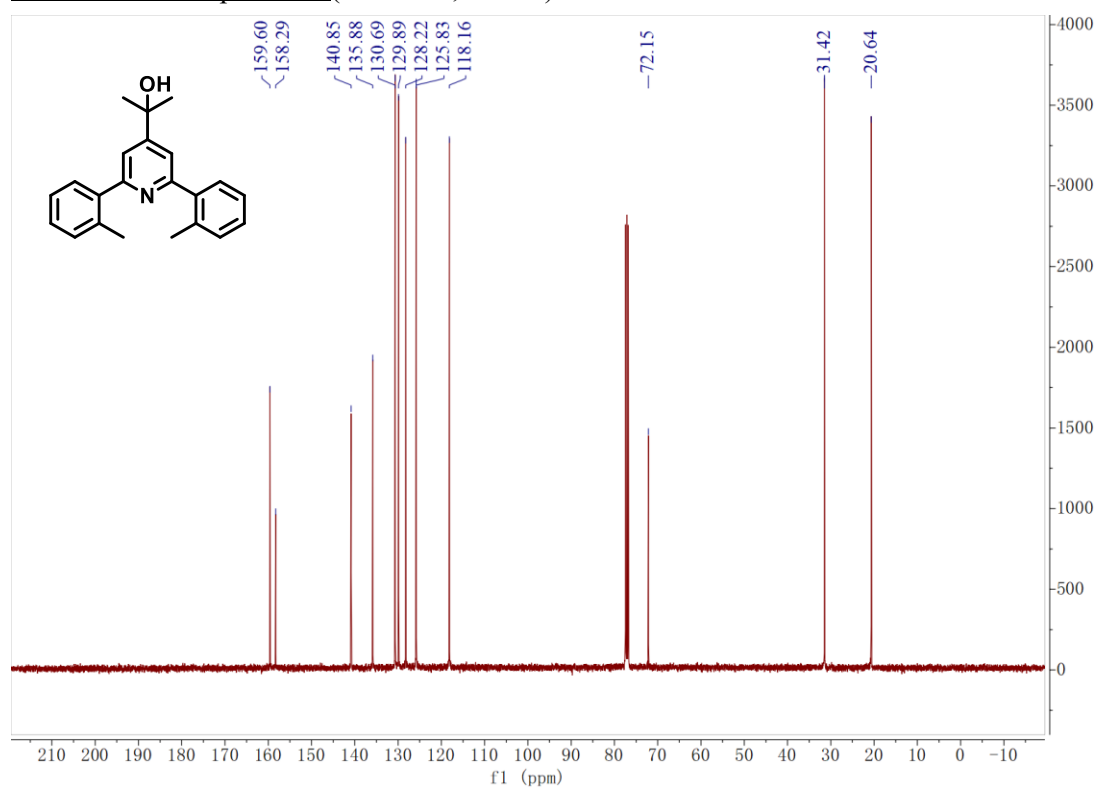

<sup>1</sup>H NMR of Compound **3m** (400 MHz, CDCl<sub>3</sub>)

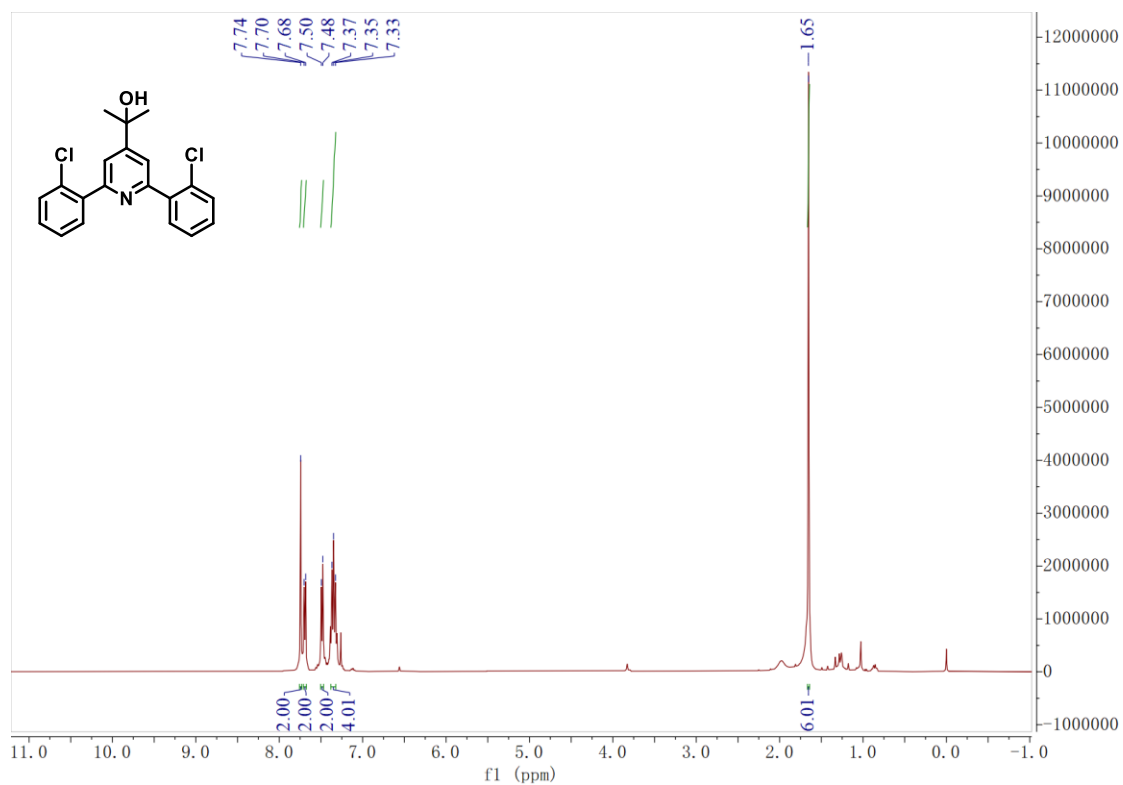

<sup>13</sup>C NMR of Compound **3m** (101 MHz, CDCl<sub>3</sub>)

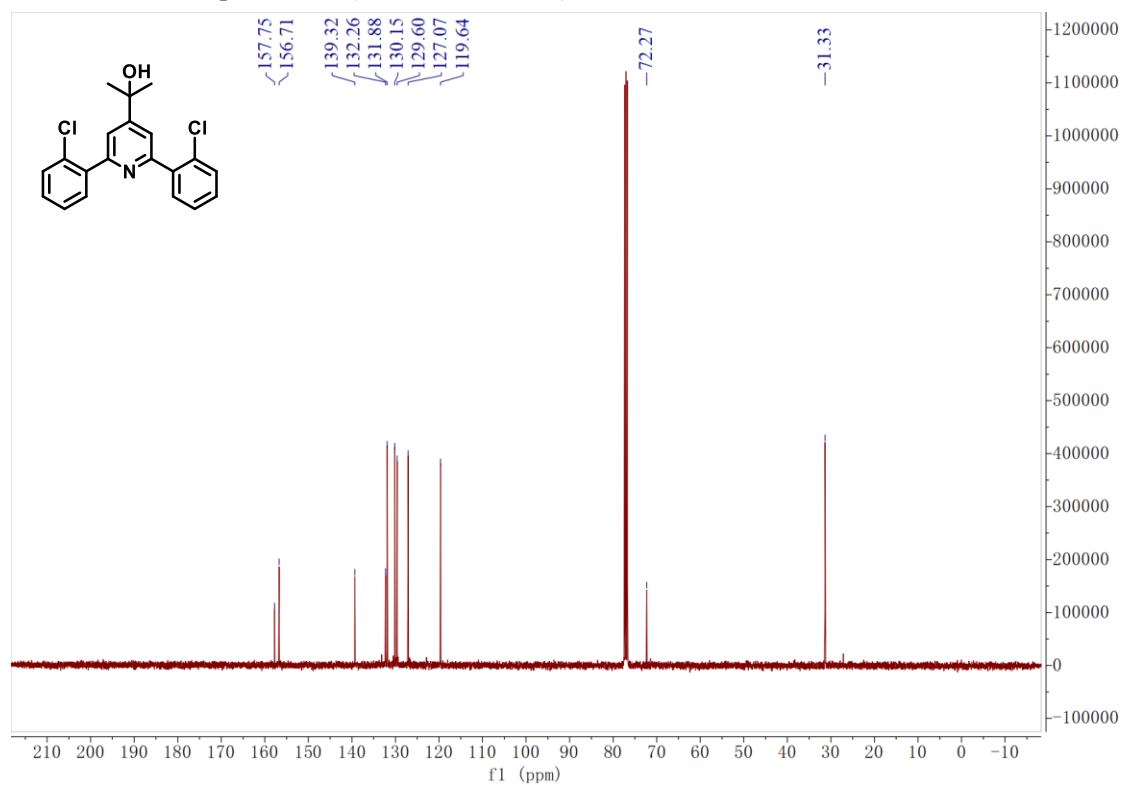



<sup>1</sup>H NMR of Compound **3n** (400 MHz, CDCl<sub>3</sub>)

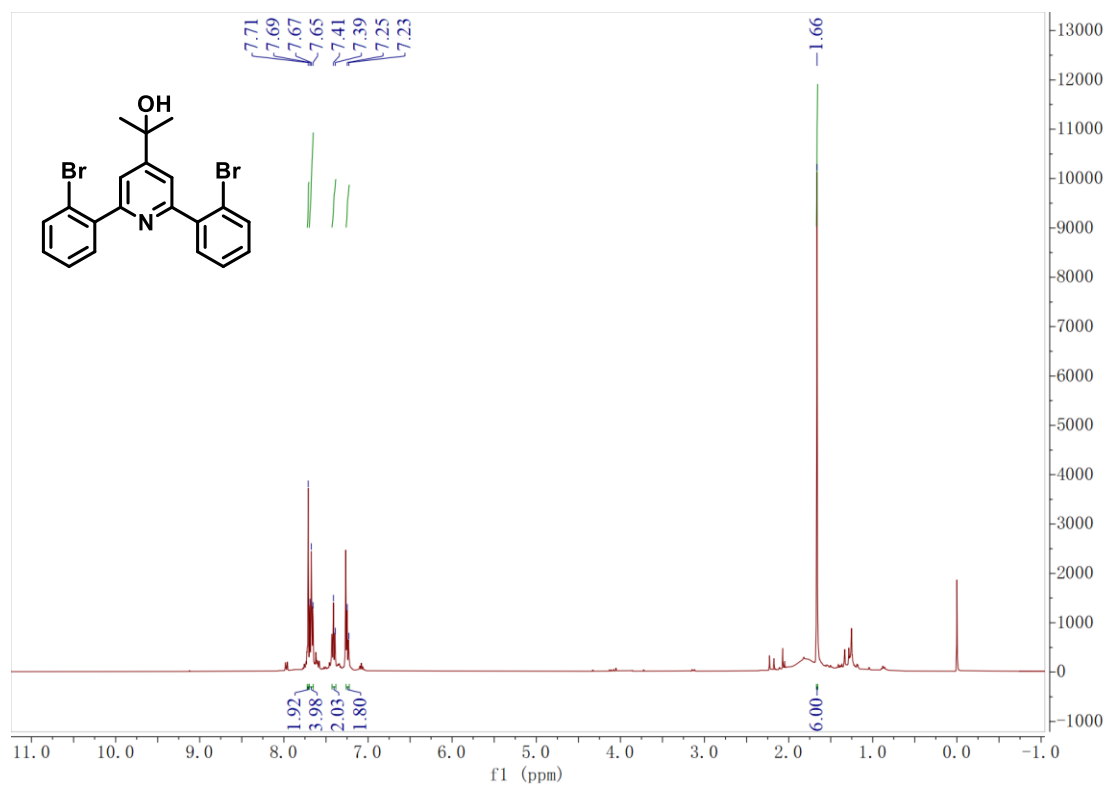

<sup>13</sup>C NMR of Compound **3n** (101 MHz, CDCl<sub>3</sub>)

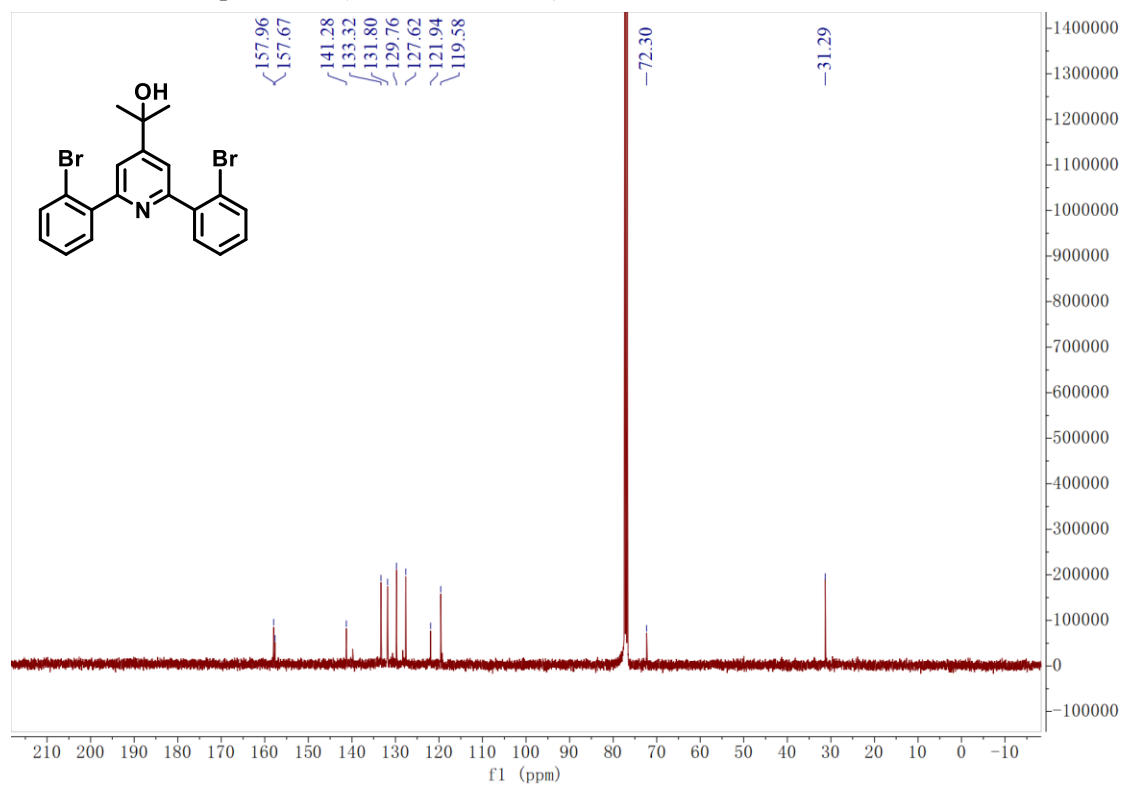

<sup>1</sup>H NMR of Compound **3o** (400 MHz, CDCl<sub>3</sub>)

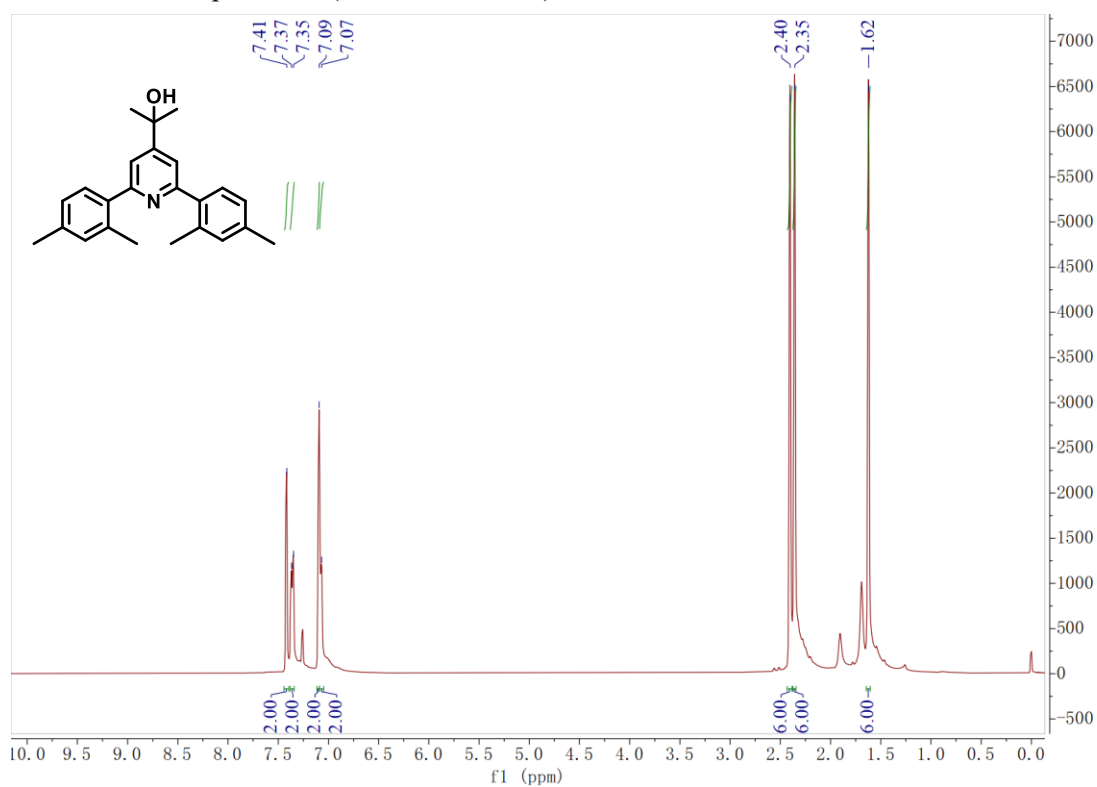

<sup>13</sup>C NMR of Compound **3o** (101 MHz, CDCl<sub>3</sub>)

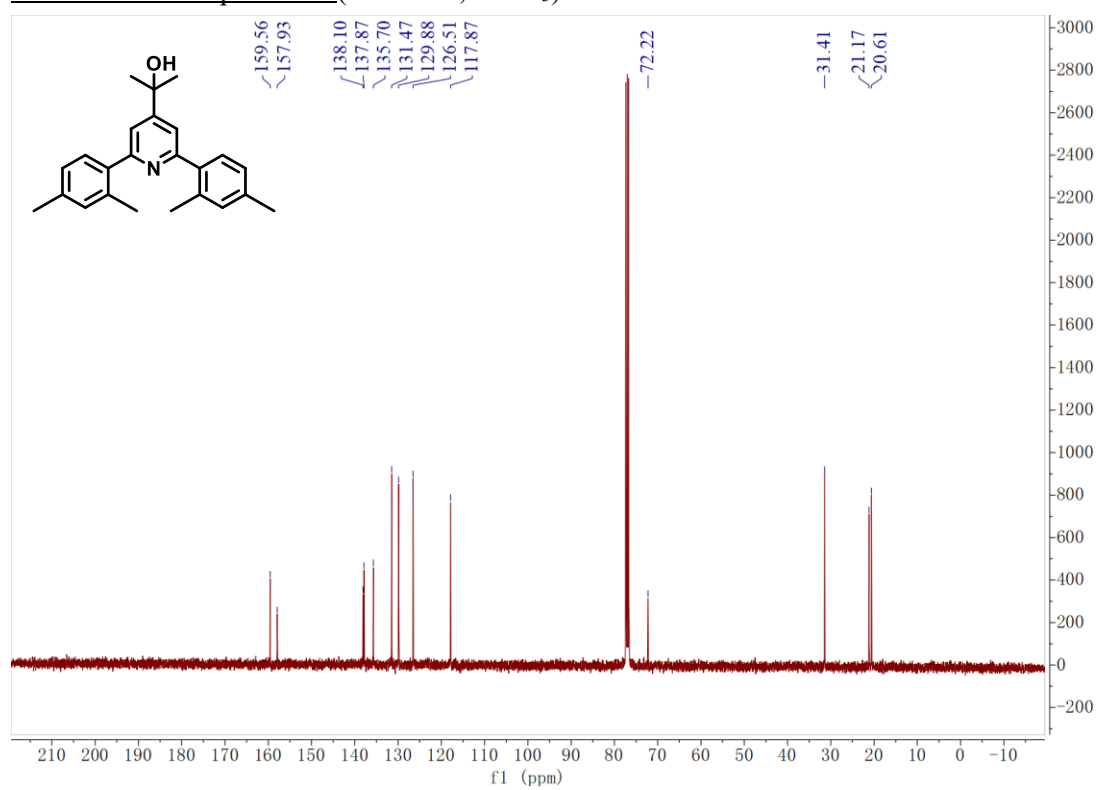

<sup>1</sup>H NMR of Compound **3p** (400 MHz, CDCl<sub>3</sub>)

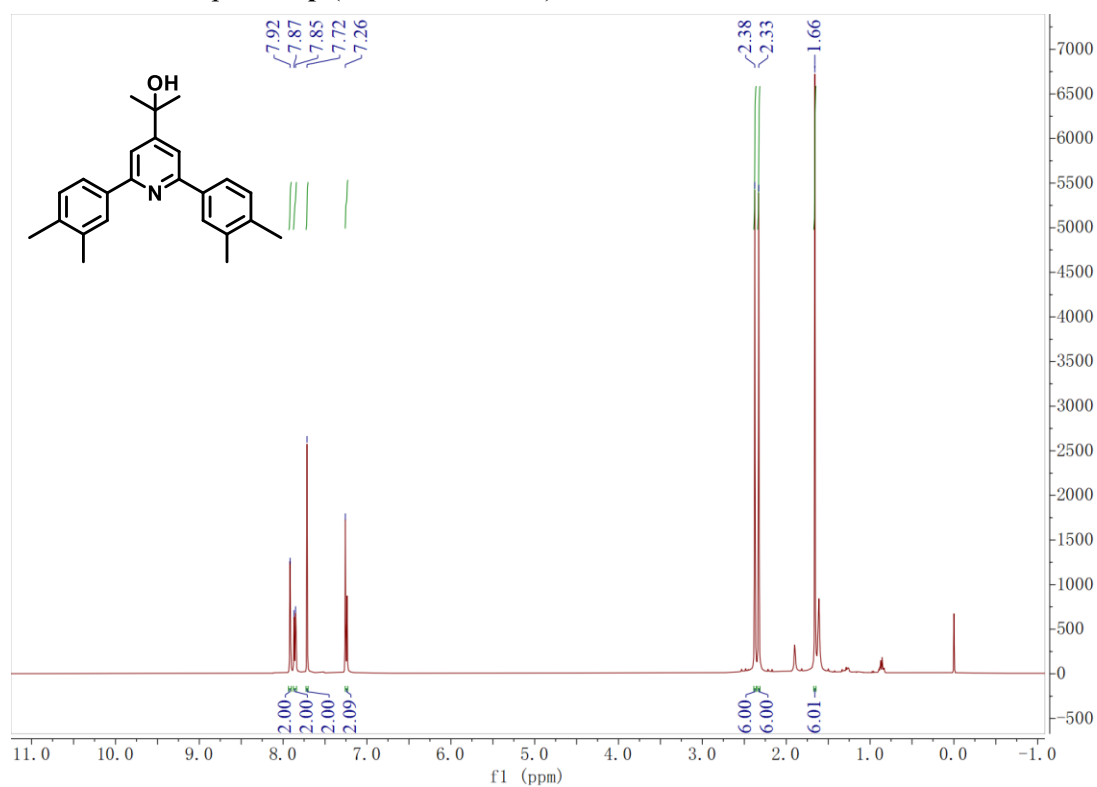

<sup>13</sup>C NMR of Compound **3p** (101 MHz, CDCl<sub>3</sub>)

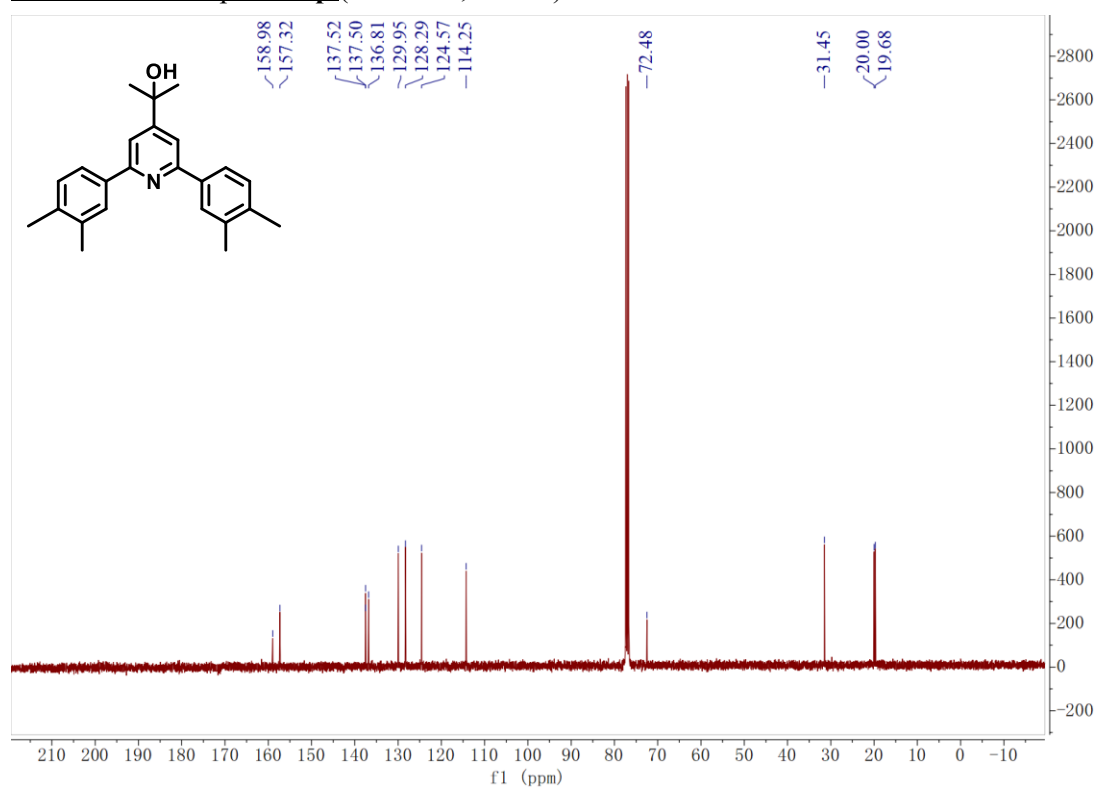

<sup>1</sup>H NMR of Compound **3q** (400 MHz, CDCl<sub>3</sub>)

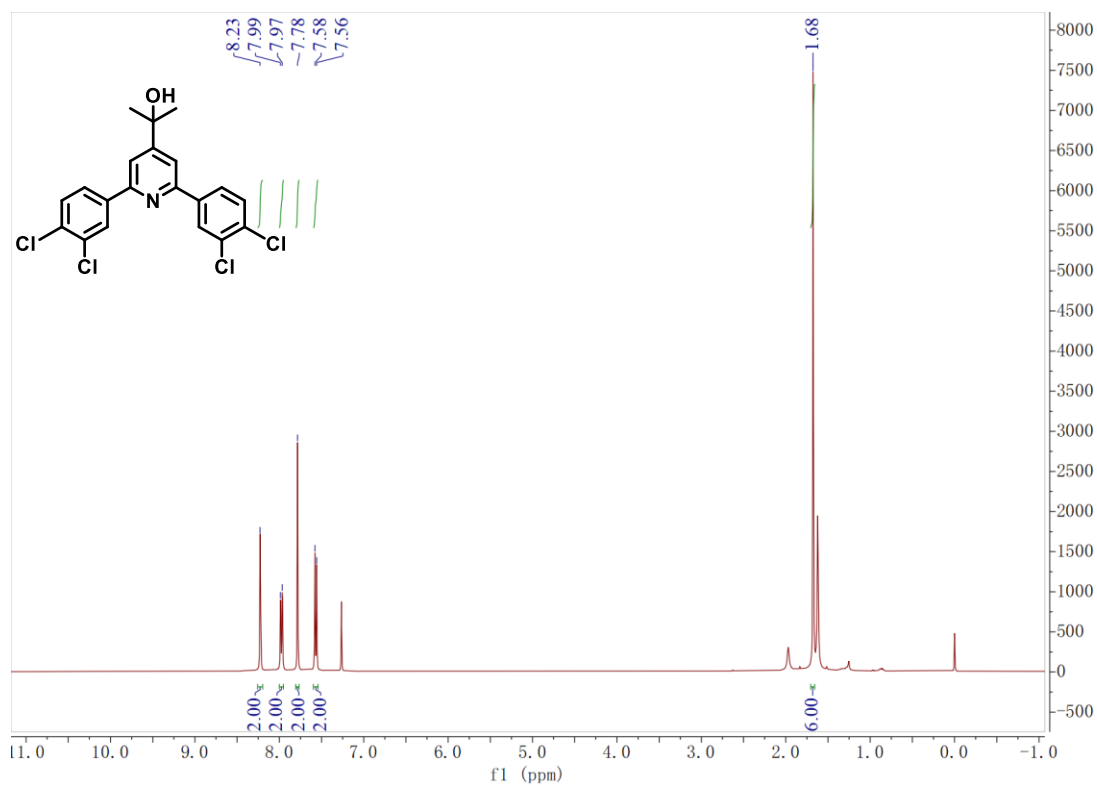

<sup>13</sup>C NMR of Compound **3q** (101 MHz, CDCl<sub>3</sub>)

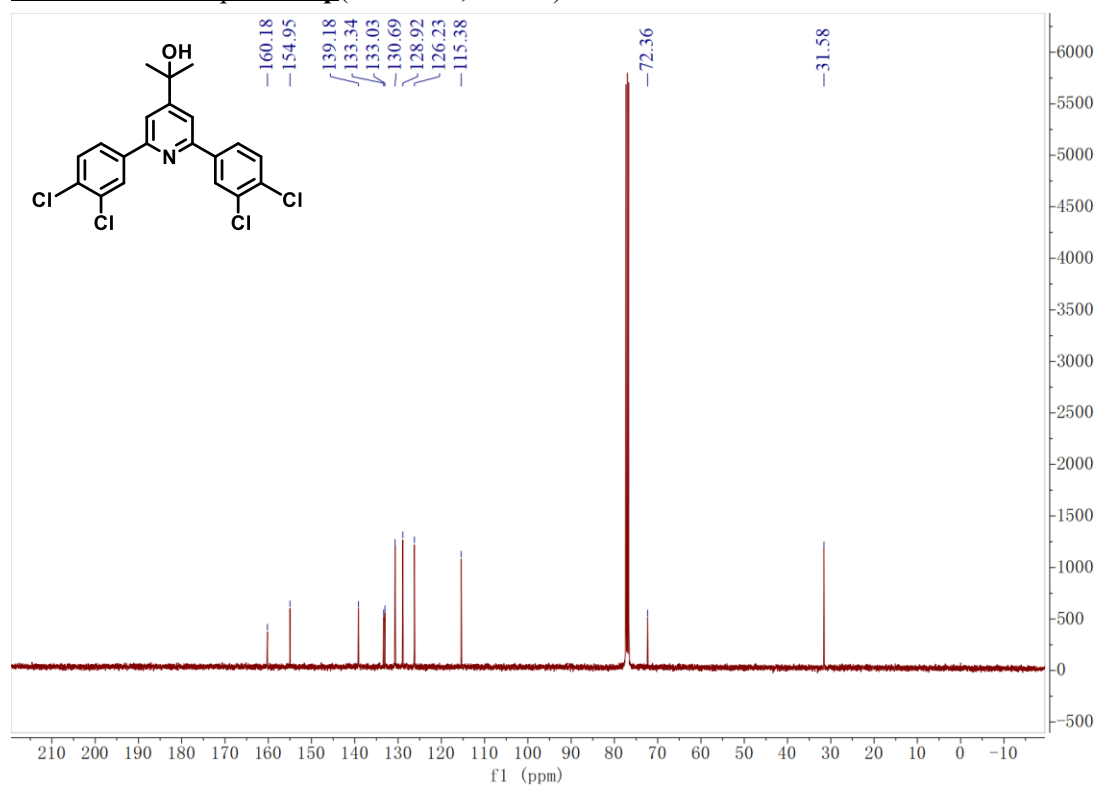

**<sup>1</sup>H NMR of Compound 3r (400 MHz, CDCl<sub>3</sub>)**

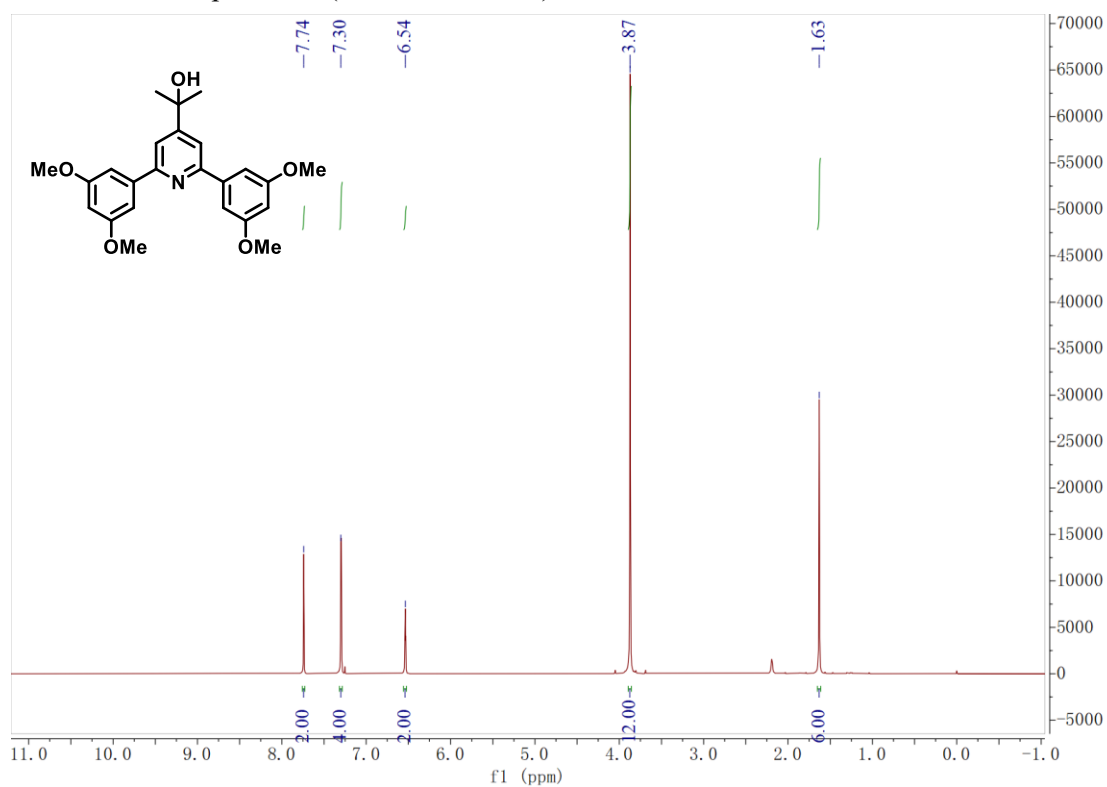

**<sup>13</sup>C NMR of Compound 3r (101 MHz, CDCl<sub>3</sub>)**

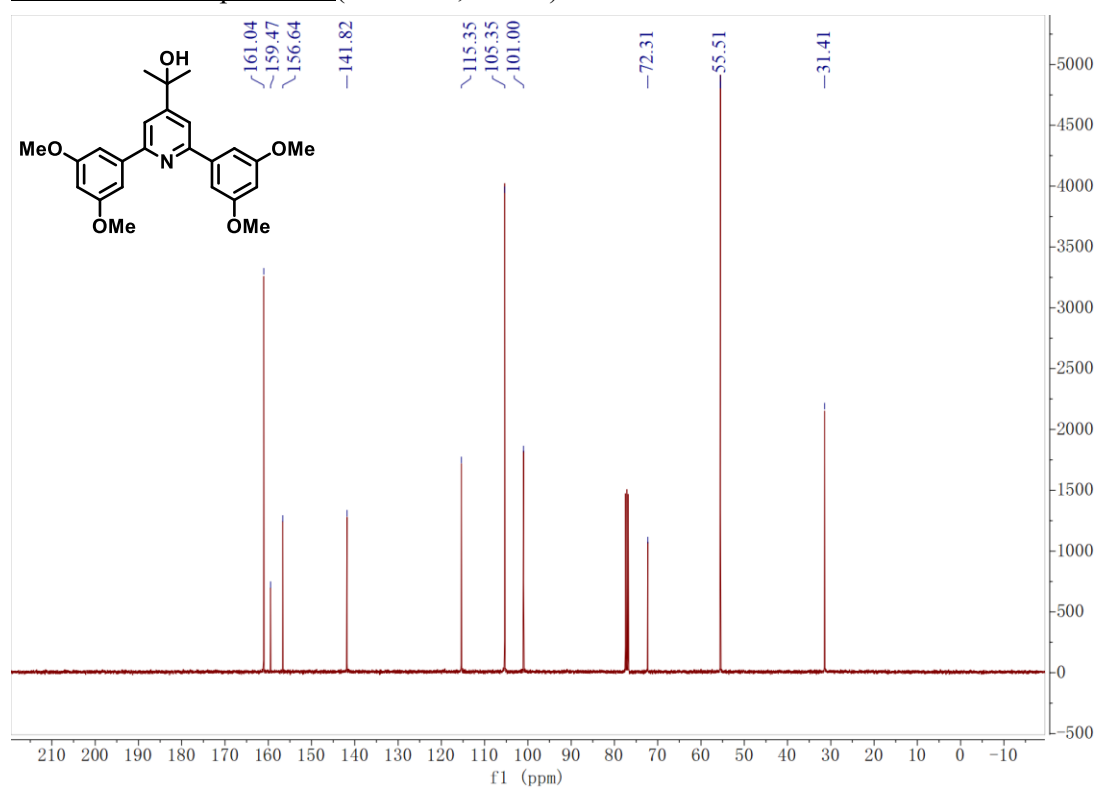

**<sup>1</sup>H NMR of Compound 3s (400 MHz, CDCl<sub>3</sub>)**

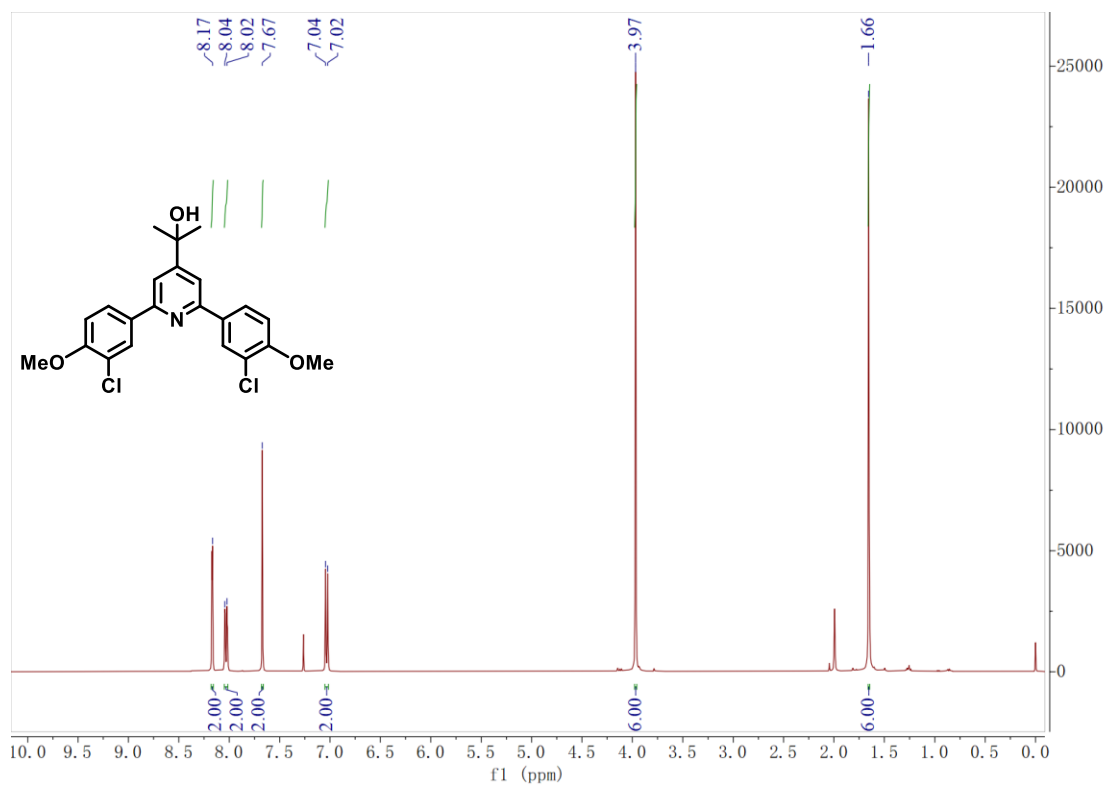

**<sup>13</sup>C NMR of Compound 3s (101 MHz, CDCl<sub>3</sub>)**

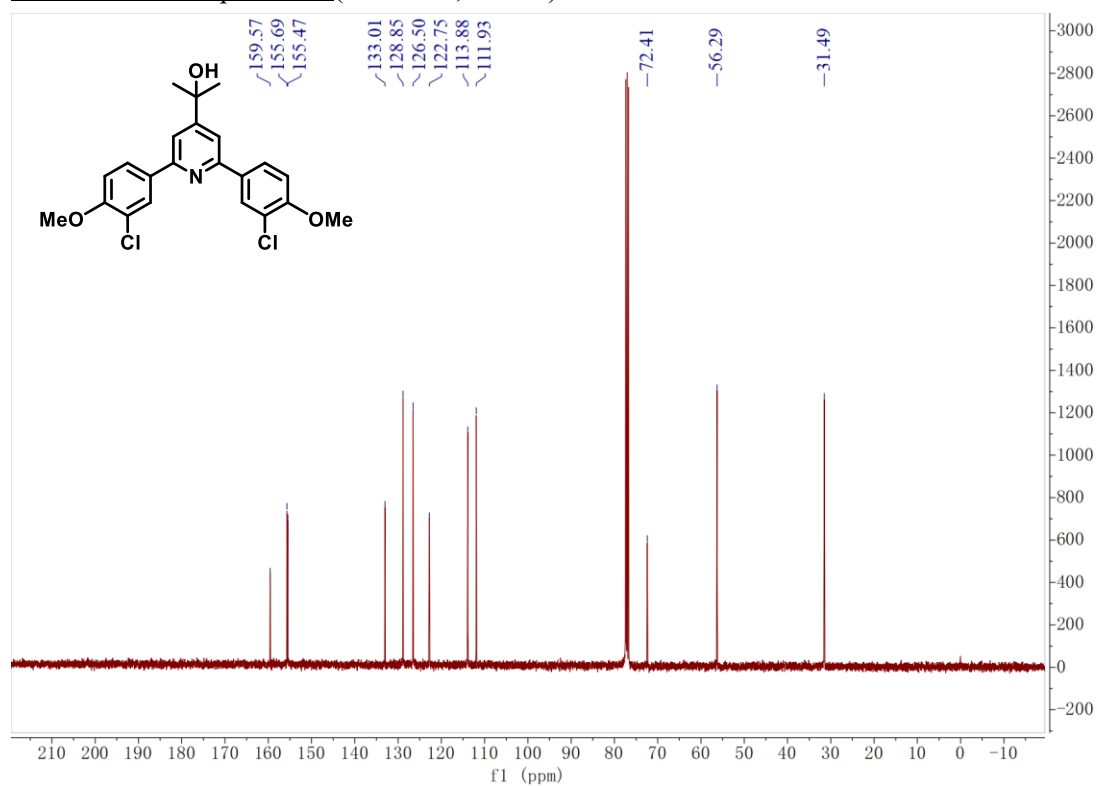

<sup>1</sup>H NMR of Compound **3t** (400 MHz, CDCl<sub>3</sub>)

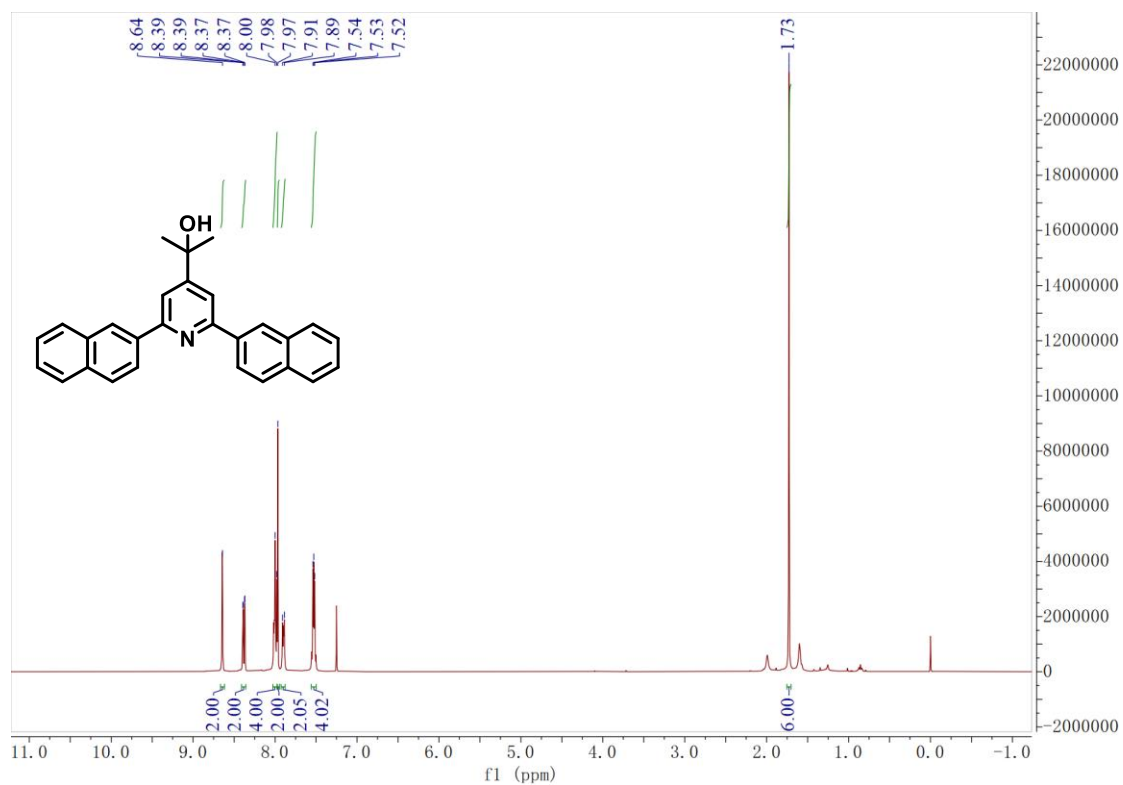

<sup>13</sup>C NMR of Compound **3t** (101 MHz, CDCl<sub>3</sub>)

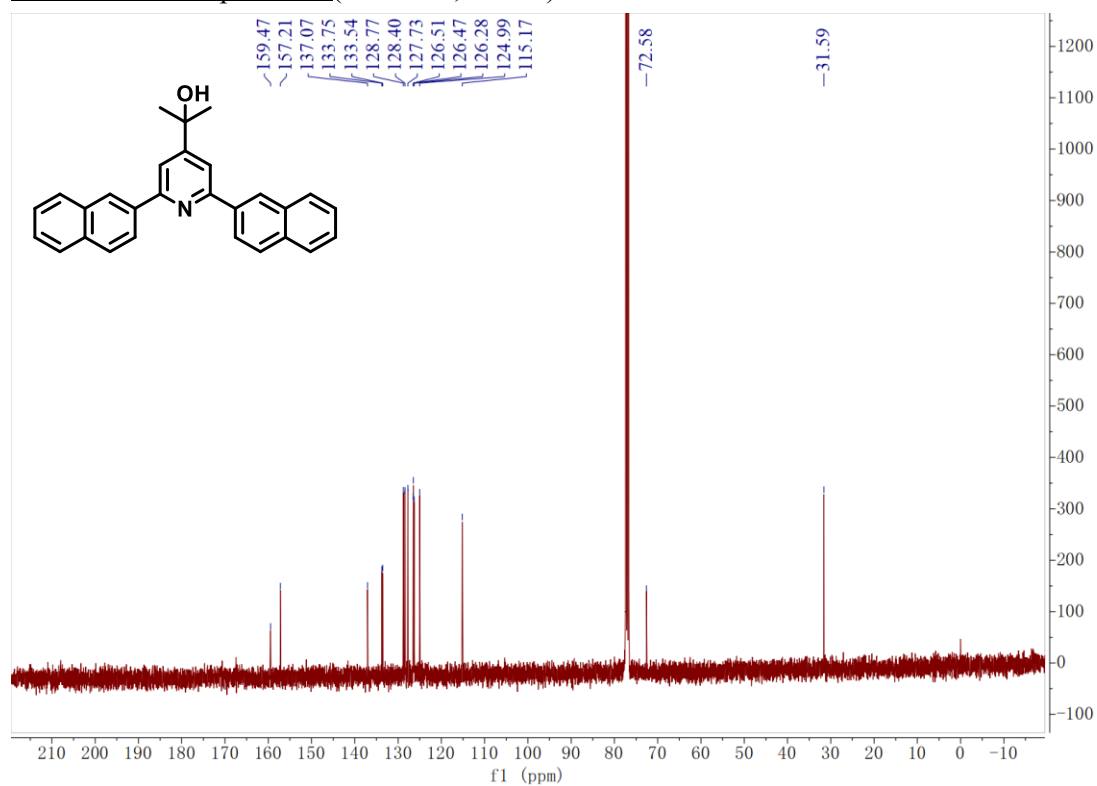

<sup>1</sup>H NMR of Compound **3u** (400 MHz, CDCl<sub>3</sub>)

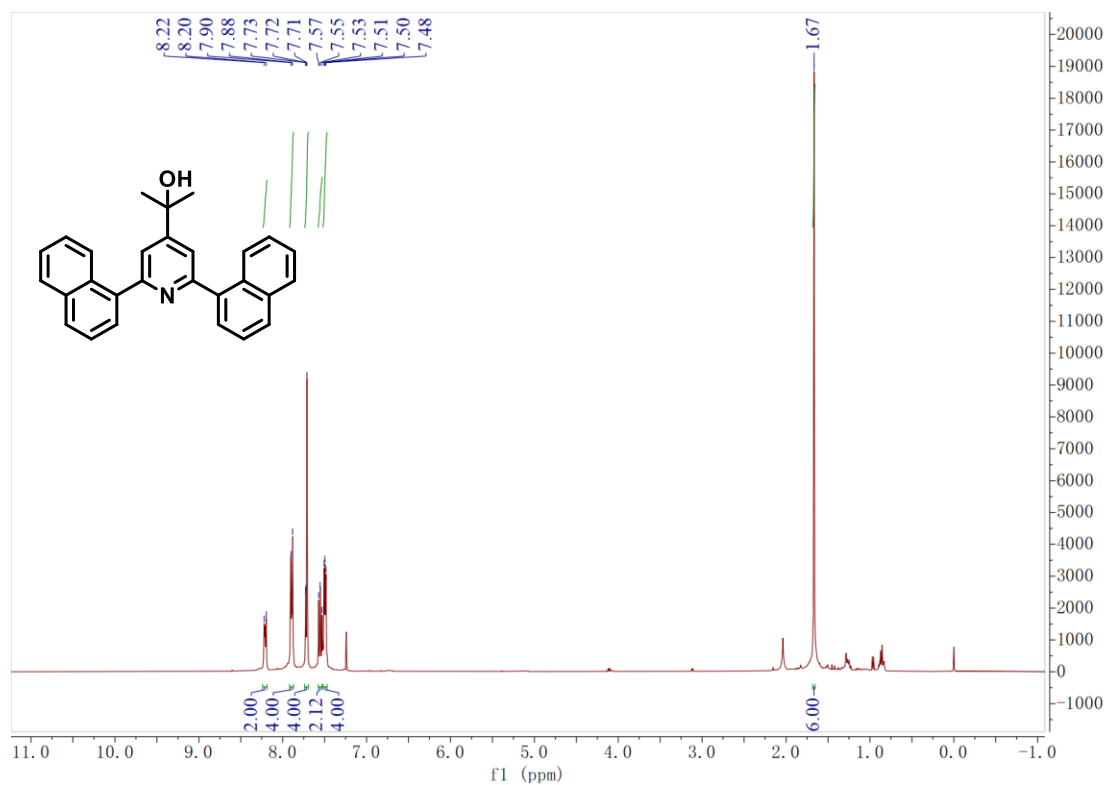

<sup>13</sup>C NMR of Compound **3u** (101 MHz, CDCl<sub>3</sub>)

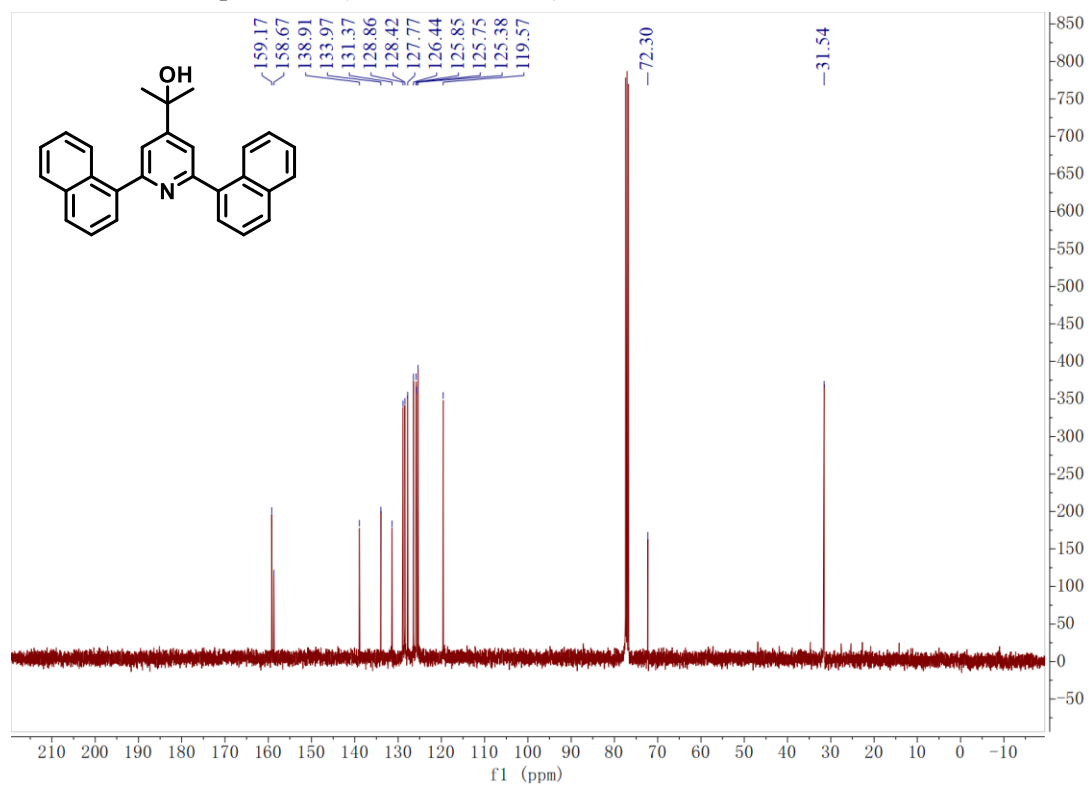



<sup>1</sup>H NMR of Compound **3v** (400 MHz, CDCl<sub>3</sub>)

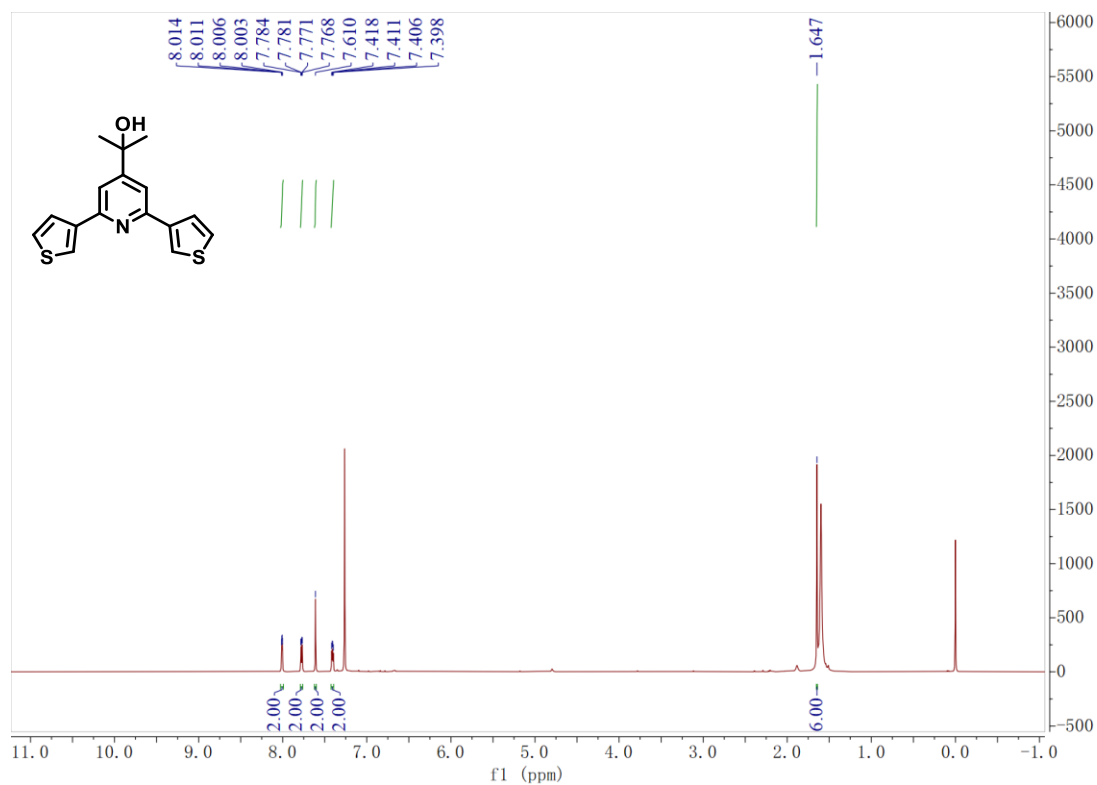

<sup>13</sup>C NMR of Compound **3v** (101 MHz, CDCl<sub>3</sub>)

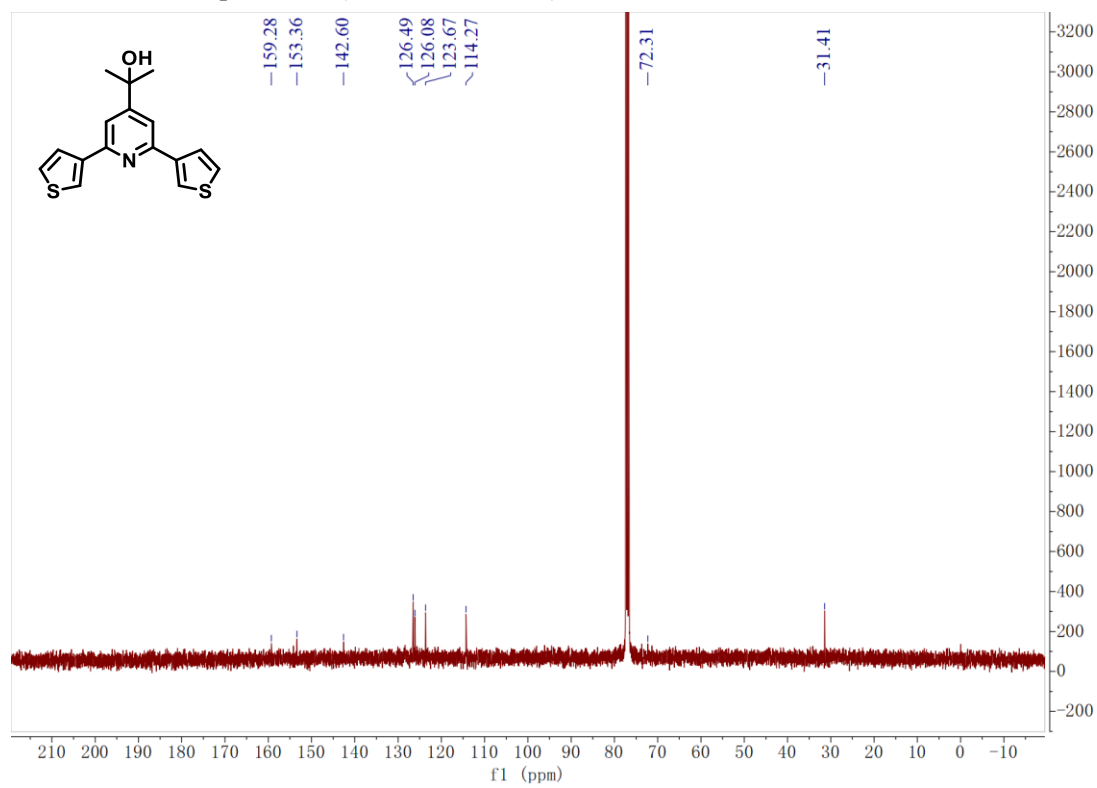

**<sup>1</sup>H NMR of Compound 3w' (400 MHz, CDCl<sub>3</sub>)**

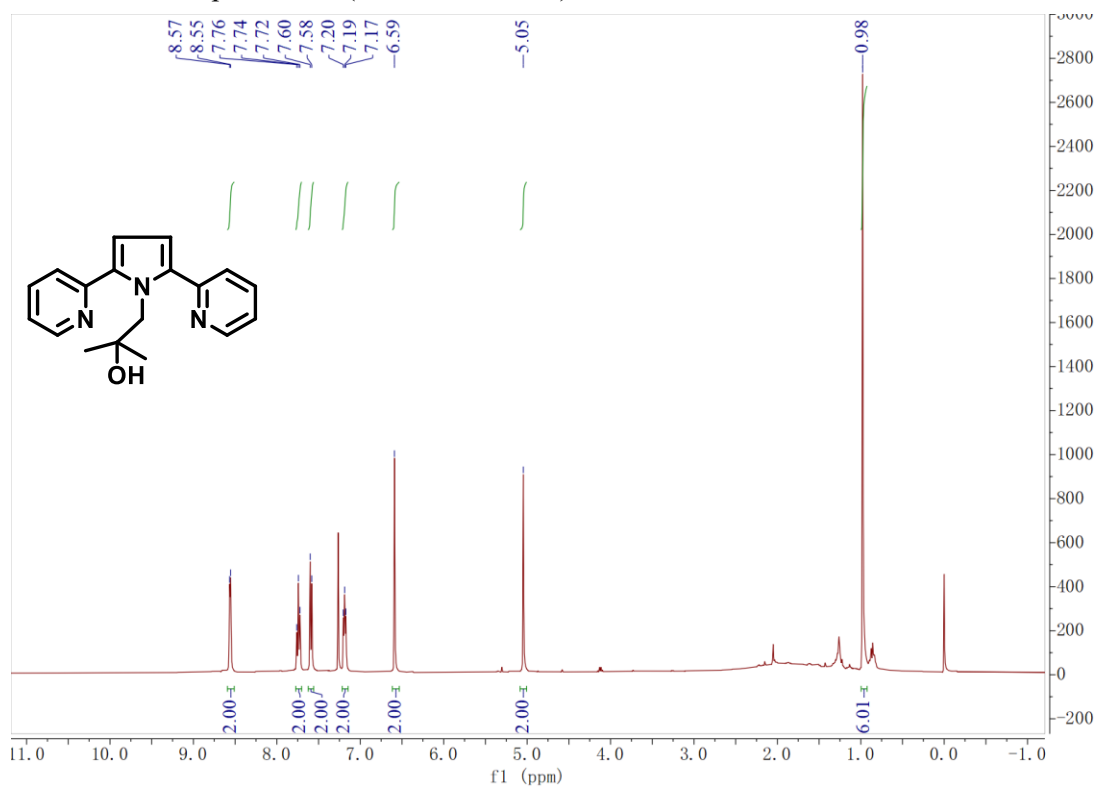

**<sup>13</sup>C NMR of Compound 3w' (101 MHz, CDCl<sub>3</sub>)**

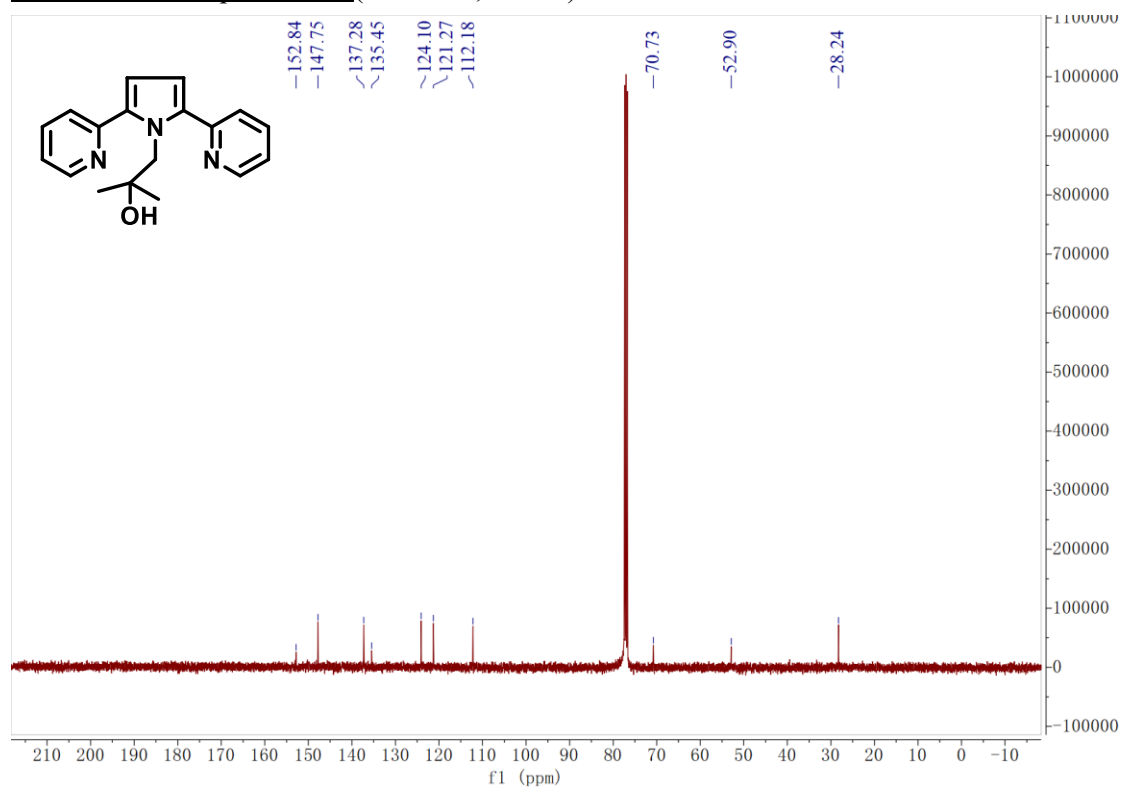

<sup>1</sup>H NMR of Compound **5a** (400 MHz, CDCl<sub>3</sub>)

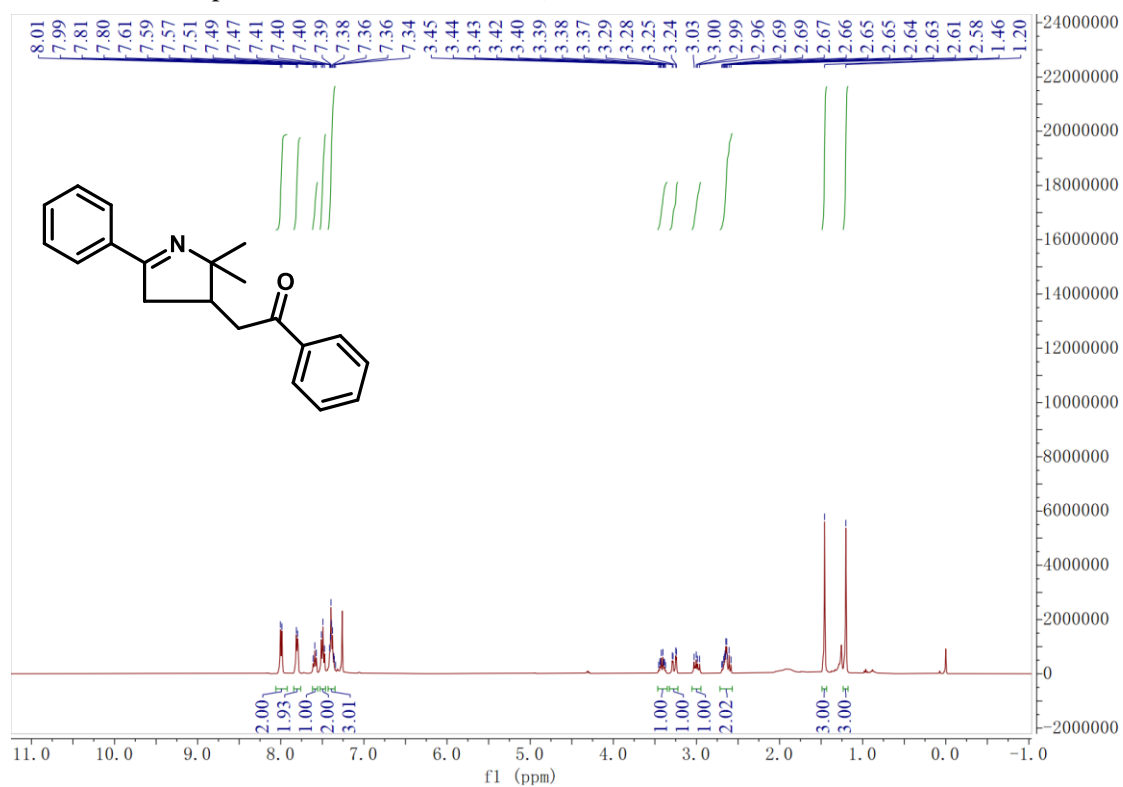

<sup>13</sup>C NMR of Compound **5a** (101 MHz, CDCl<sub>3</sub>)

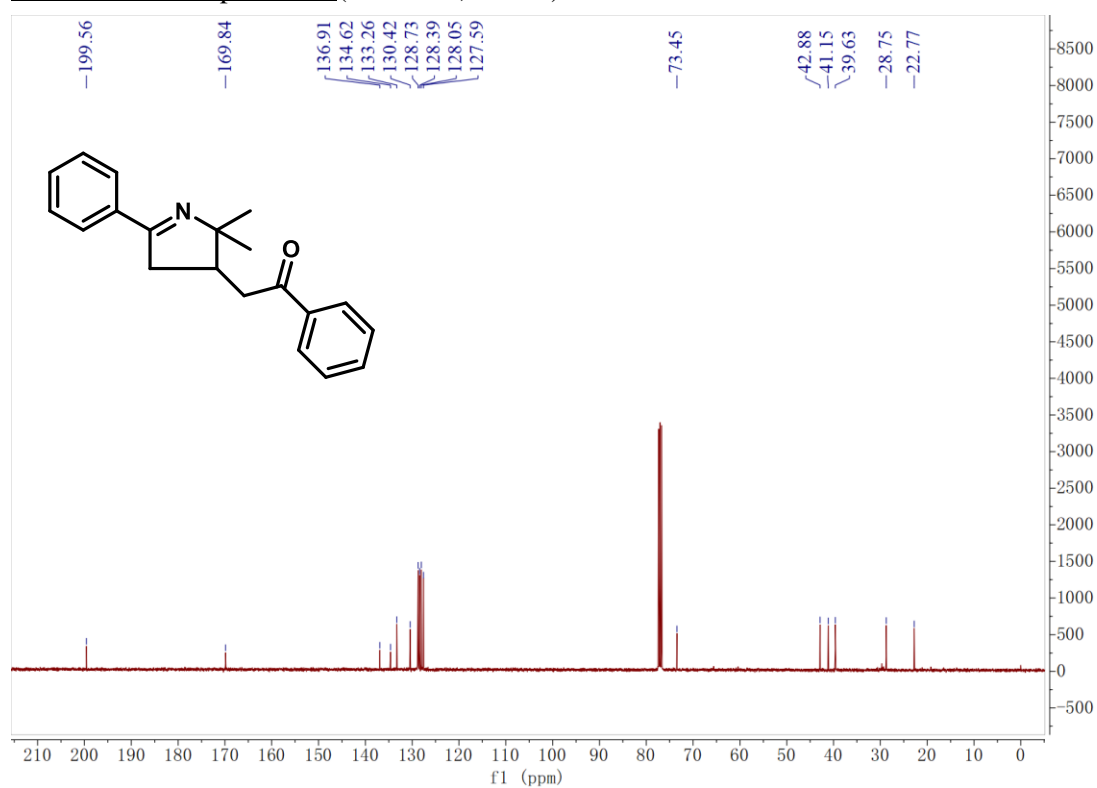

**<sup>1</sup>H NMR of Compound 5b (400 MHz, CDCl<sub>3</sub>)**

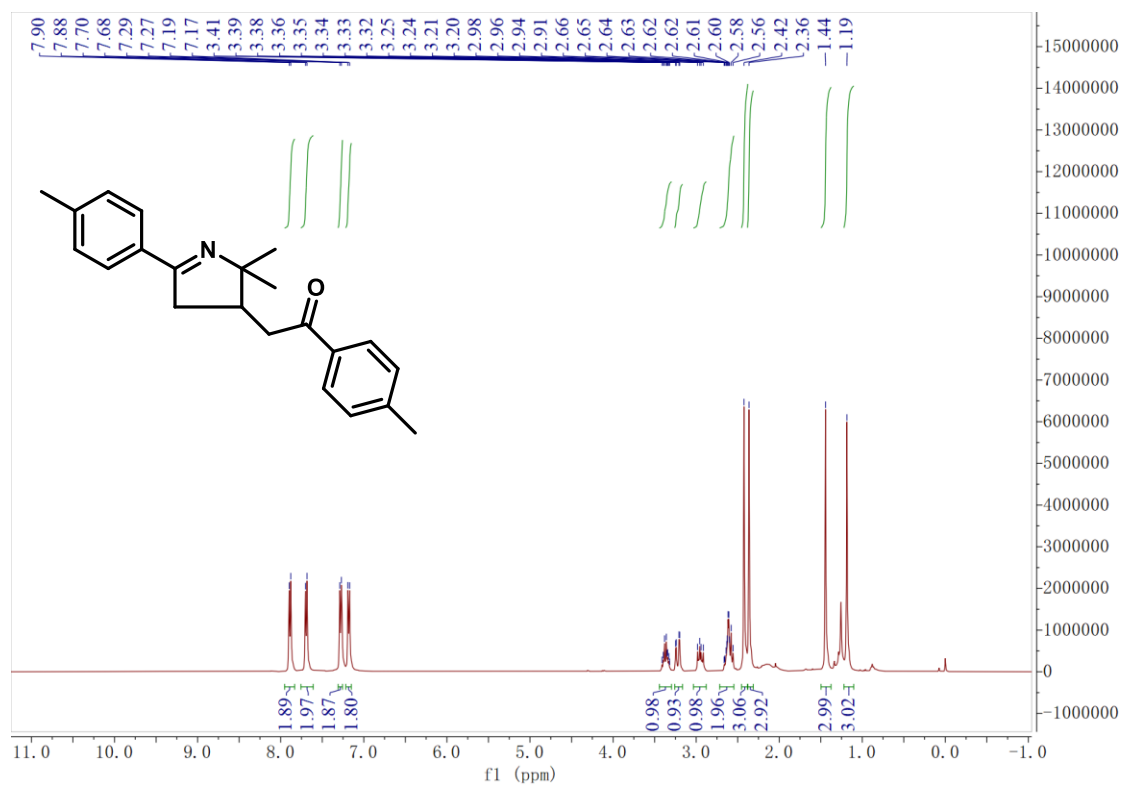

**<sup>13</sup>C NMR of Compound 5b (101 MHz, CDCl<sub>3</sub>)**

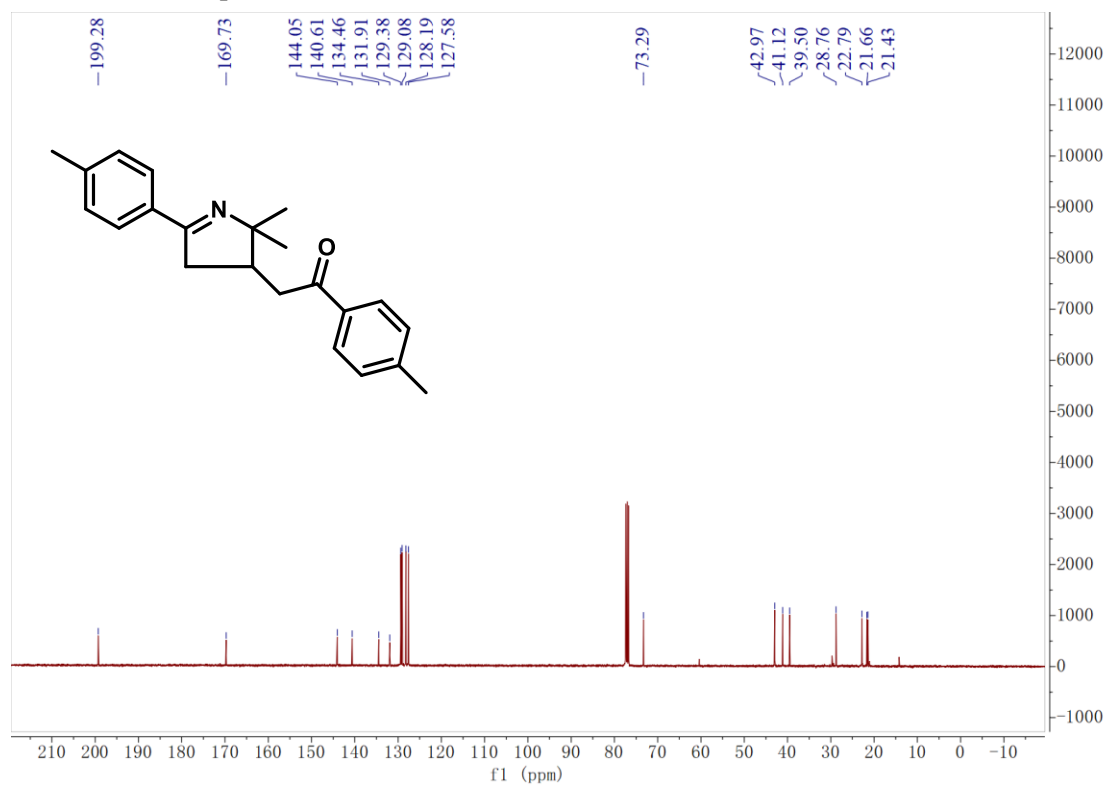

**<sup>1</sup>H NMR of Compound 5c (400 MHz, CDCl<sub>3</sub>)**

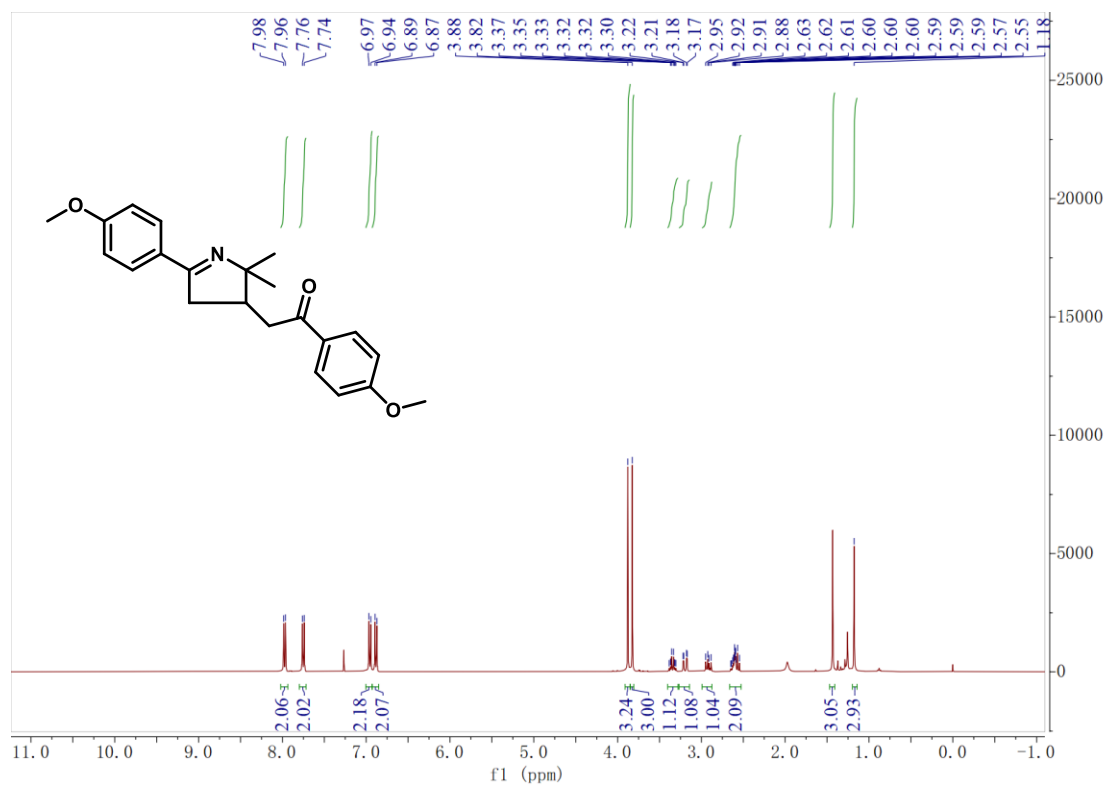

**<sup>13</sup>C NMR of Compound 5c (101 MHz, CDCl<sub>3</sub>)**

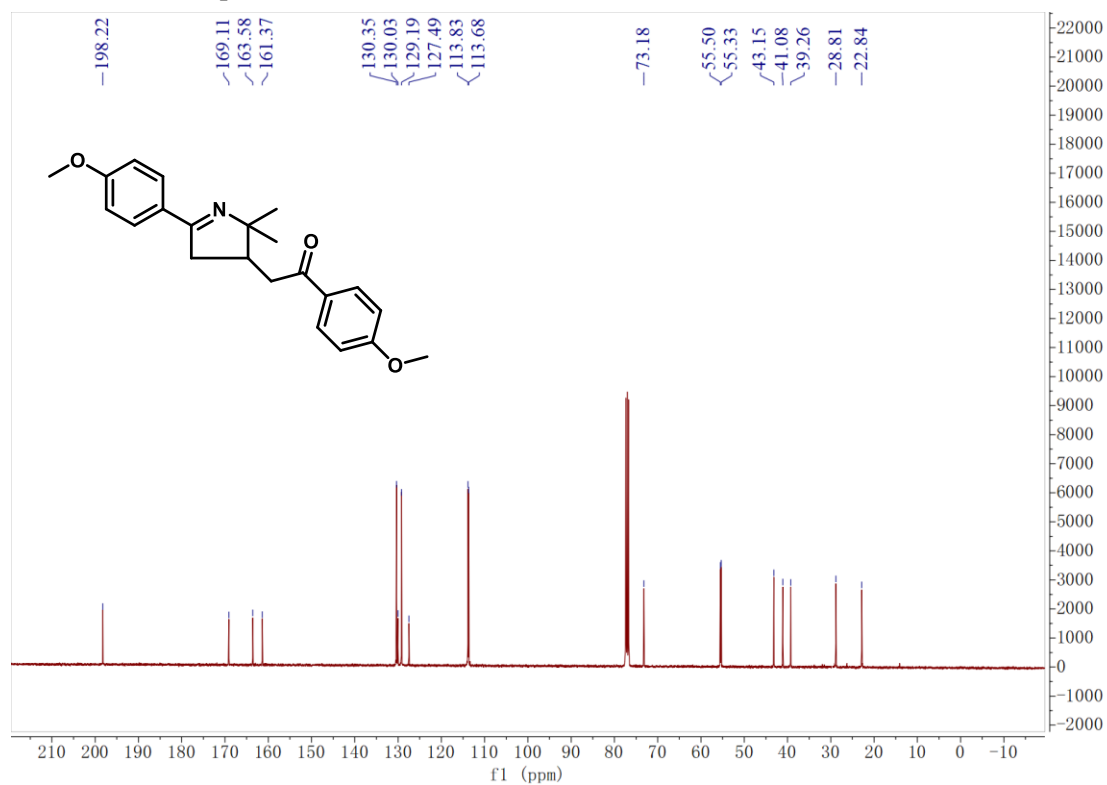

<sup>1</sup>H NMR of Compound **5d** (400 MHz, CDCl<sub>3</sub>)

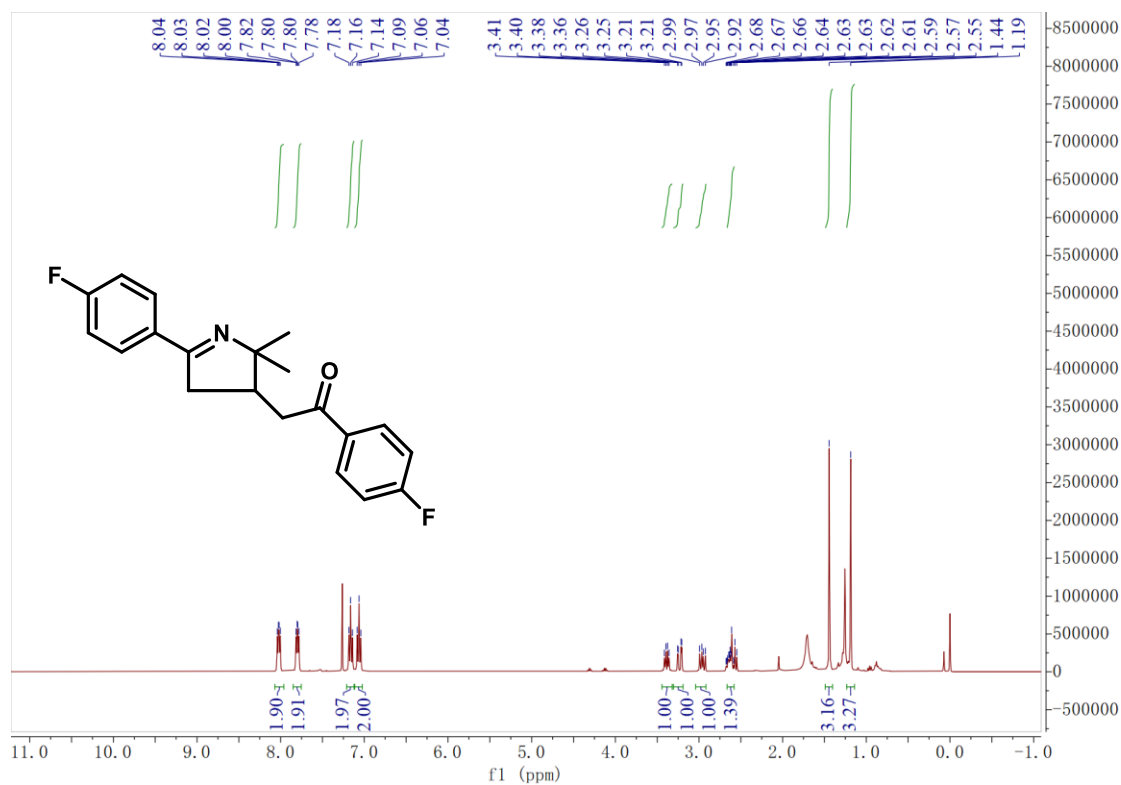

<sup>13</sup>C NMR of Compound **5d** (101 MHz, CDCl<sub>3</sub>)

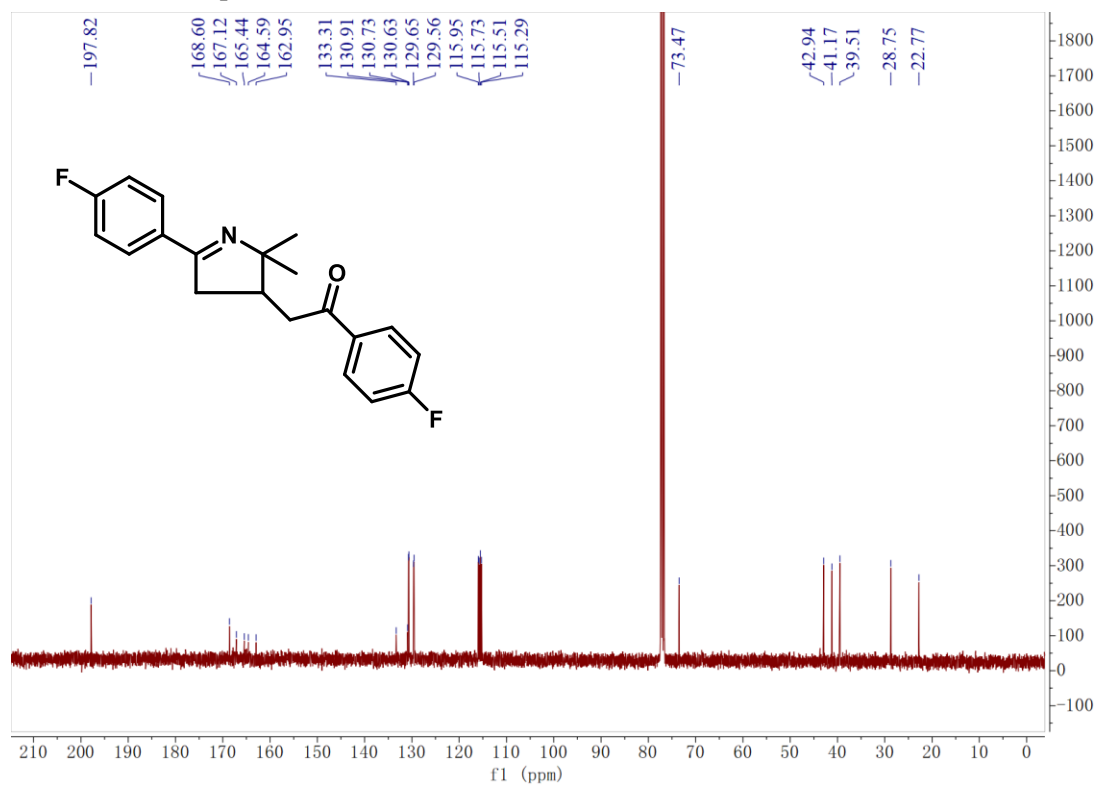

<sup>1</sup>H NMR of Compound **5e** (400 MHz, CDCl<sub>3</sub>)

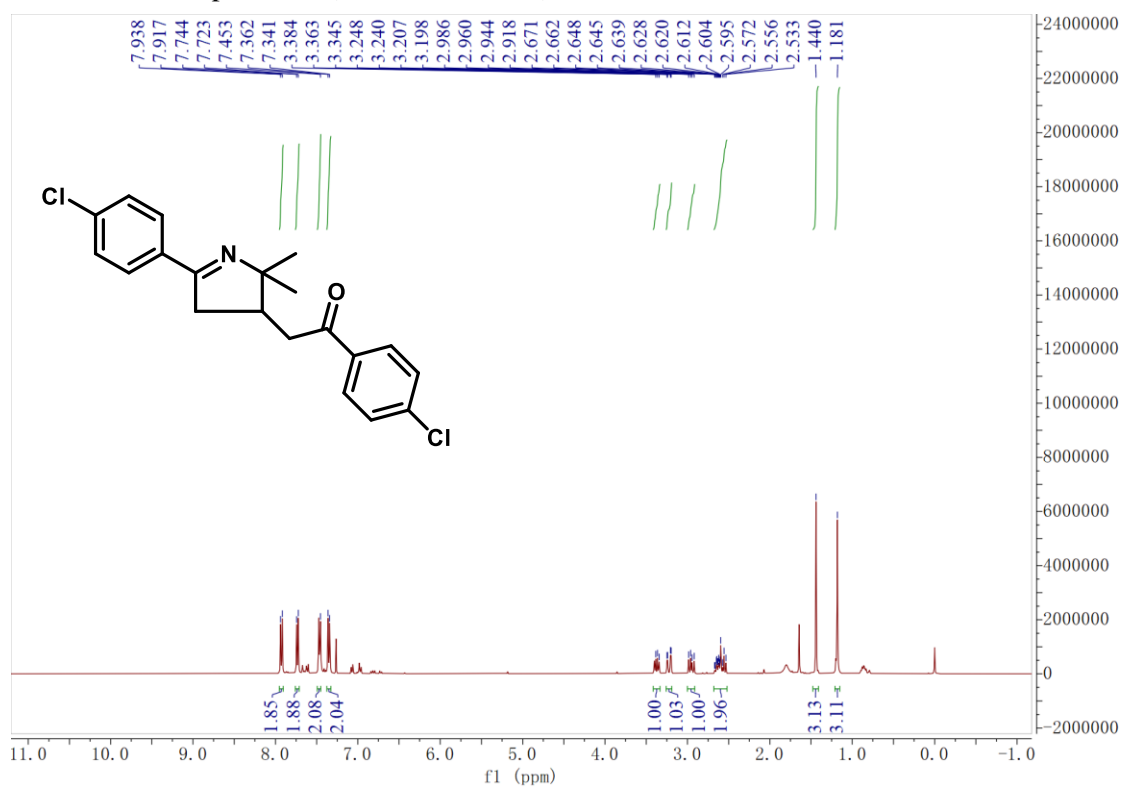

<sup>13</sup>C NMR of Compound **5e** (101 MHz, CDCl<sub>3</sub>)

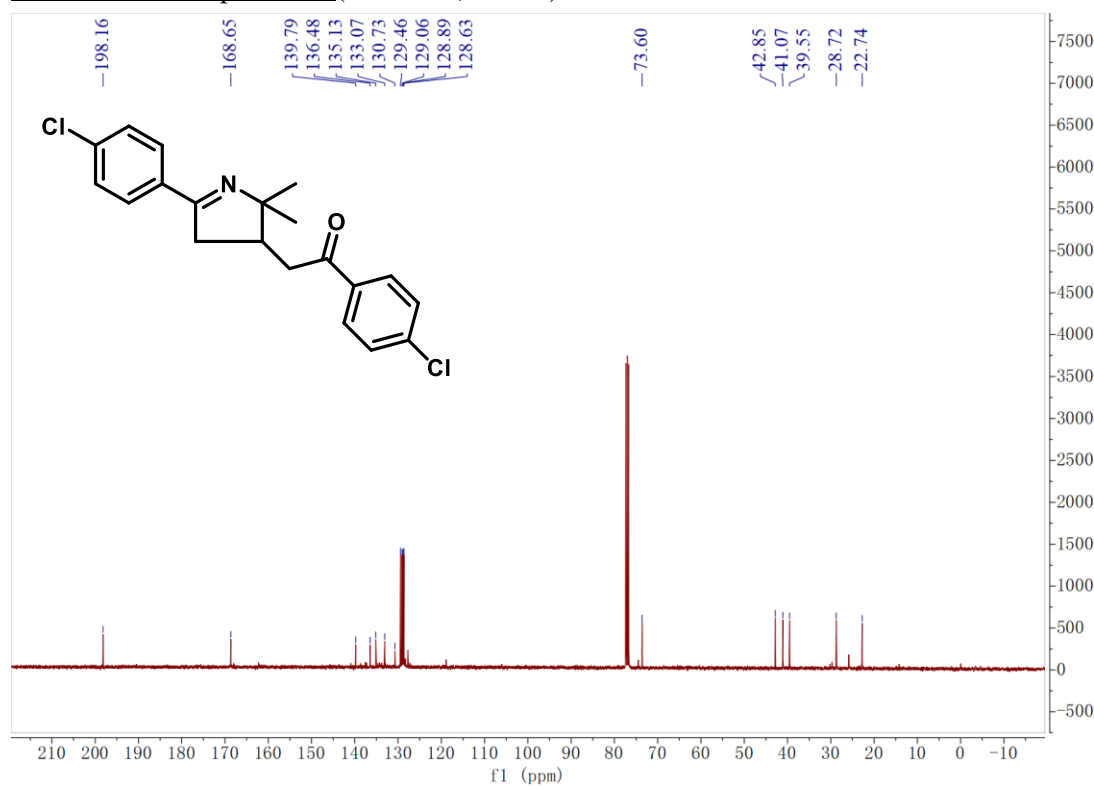

<sup>1</sup>H NMR of Compound **5f** (400 MHz, CDCl<sub>3</sub>)

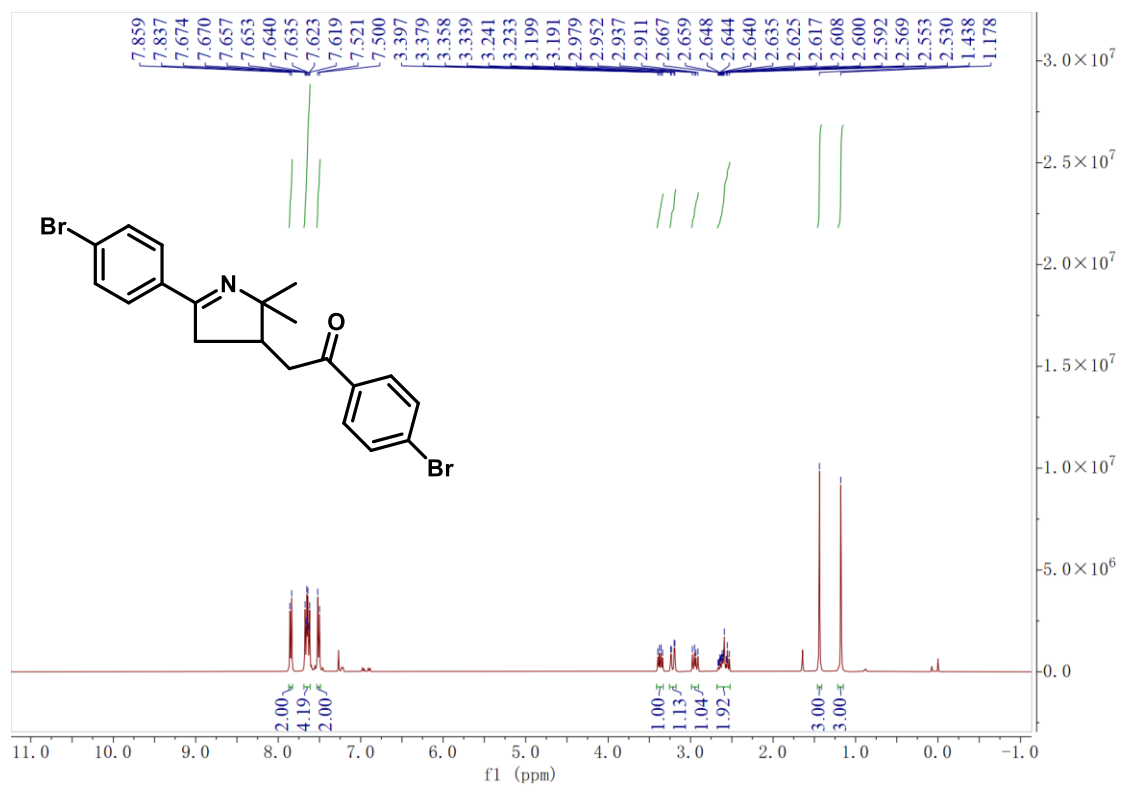

<sup>13</sup>C NMR of Compound **5f** (101 MHz, CDCl<sub>3</sub>)

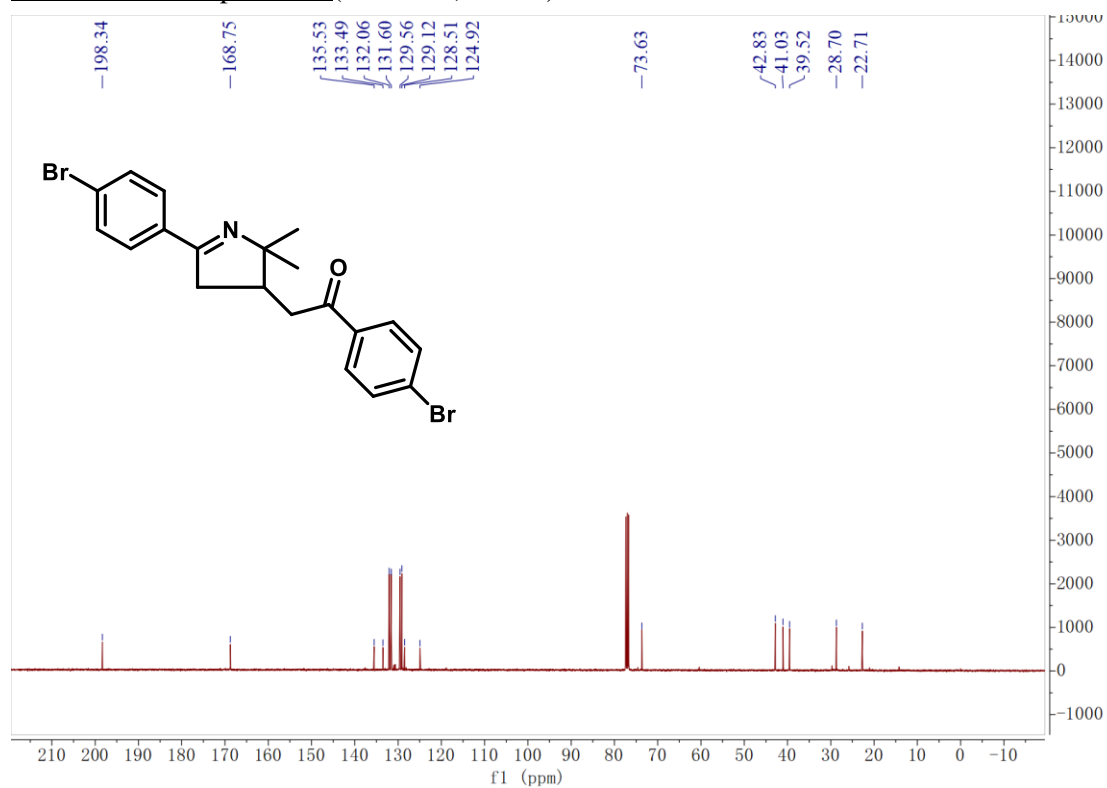



<sup>1</sup>H NMR of Compound **5g** (400 MHz, CDCl<sub>3</sub>)

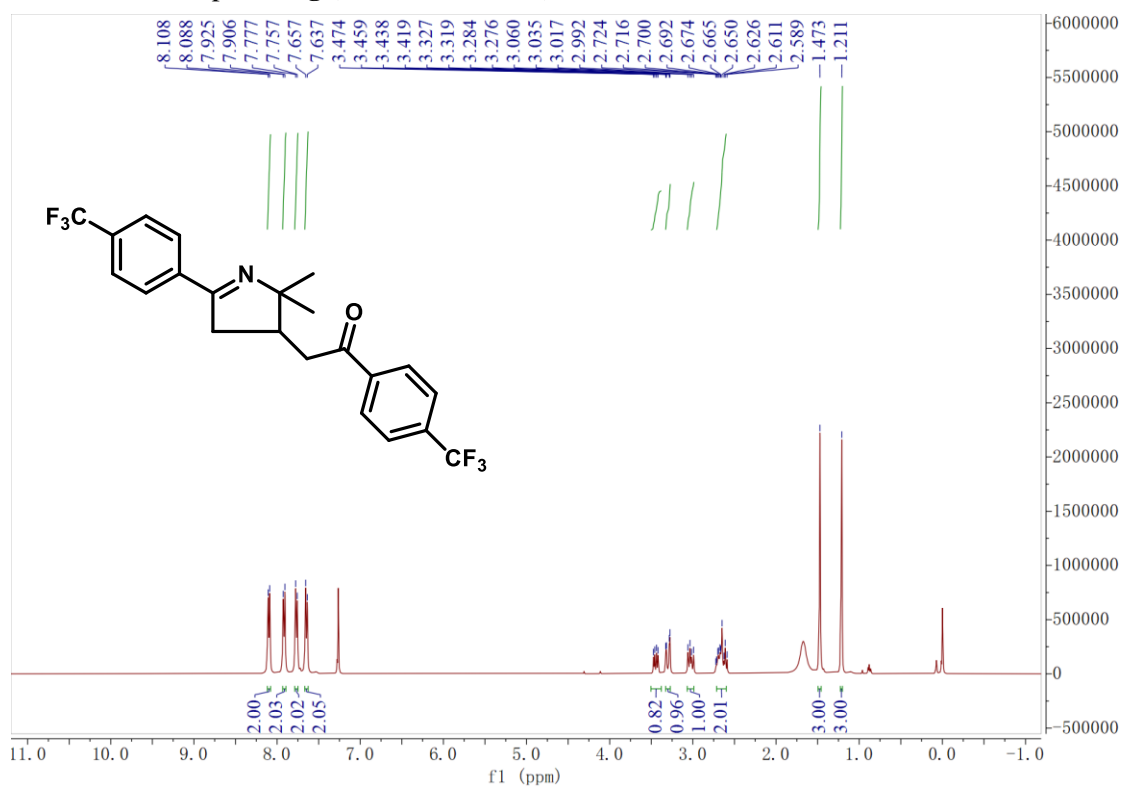

<sup>13</sup>C NMR of Compound **5g** (101 MHz, CDCl<sub>3</sub>)

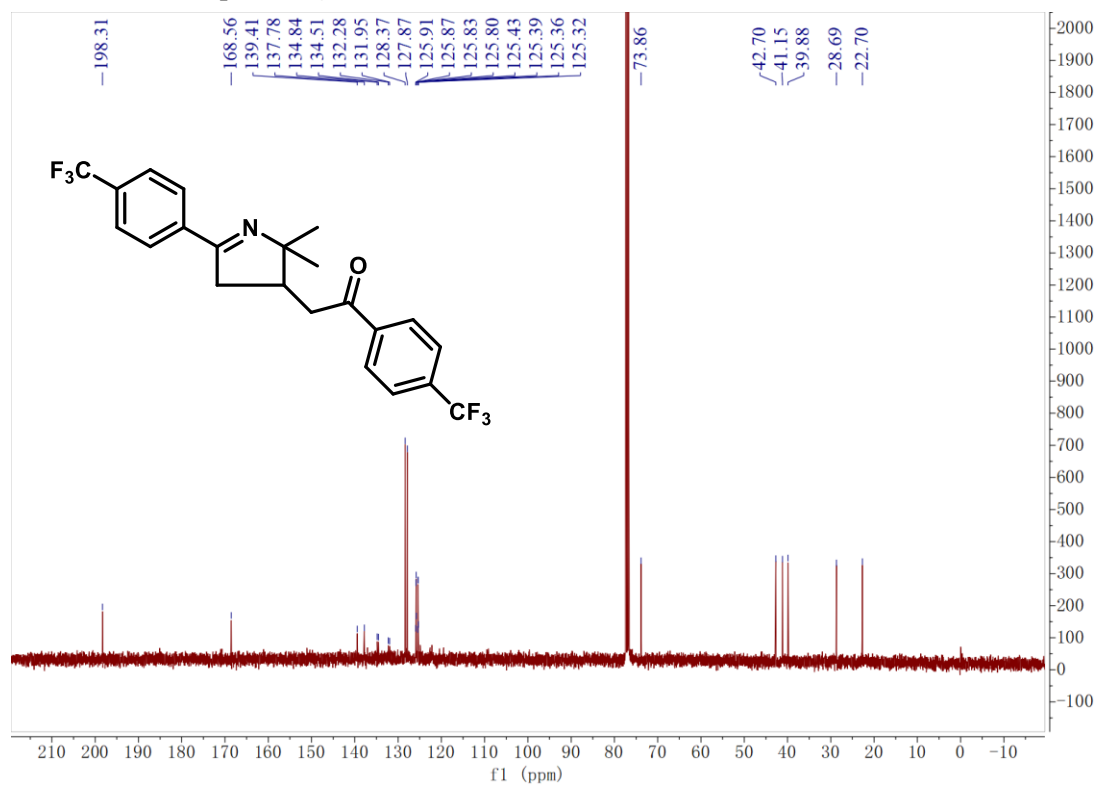

**<sup>1</sup>H NMR of Compound 5h (400 MHz, CDCl<sub>3</sub>)**

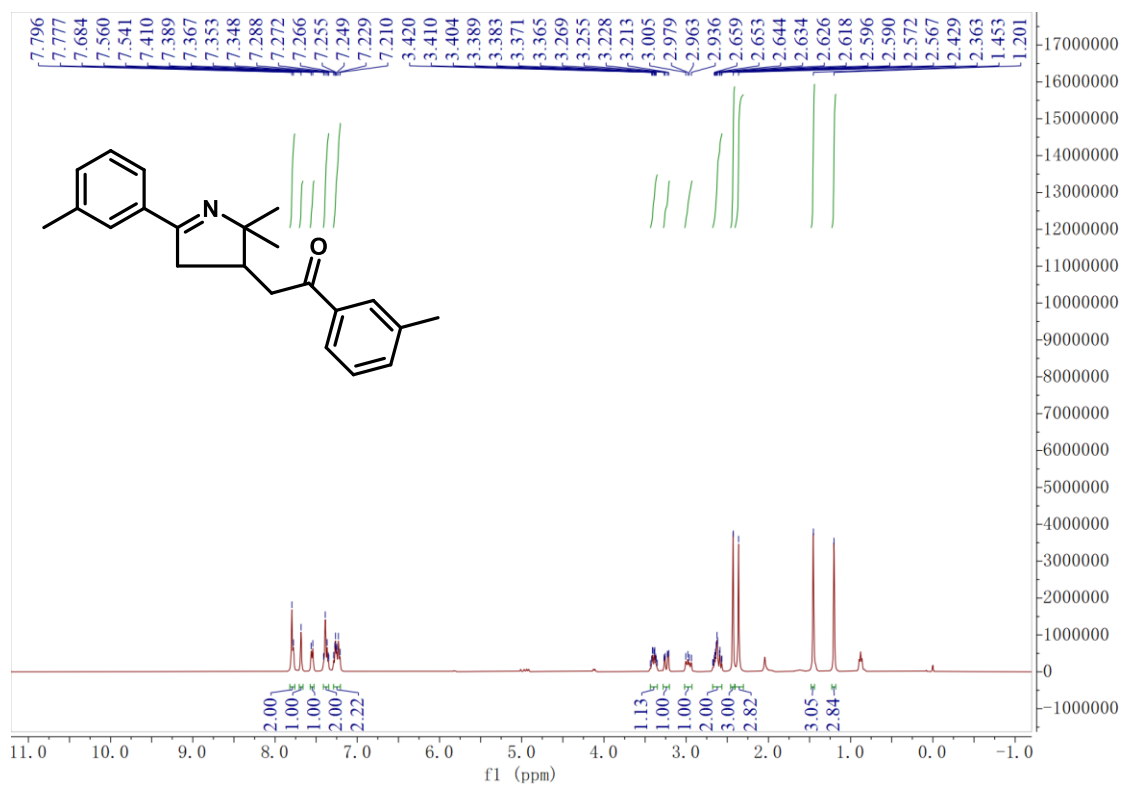

**<sup>13</sup>C NMR of Compound 5h (101 MHz, CDCl<sub>3</sub>)**

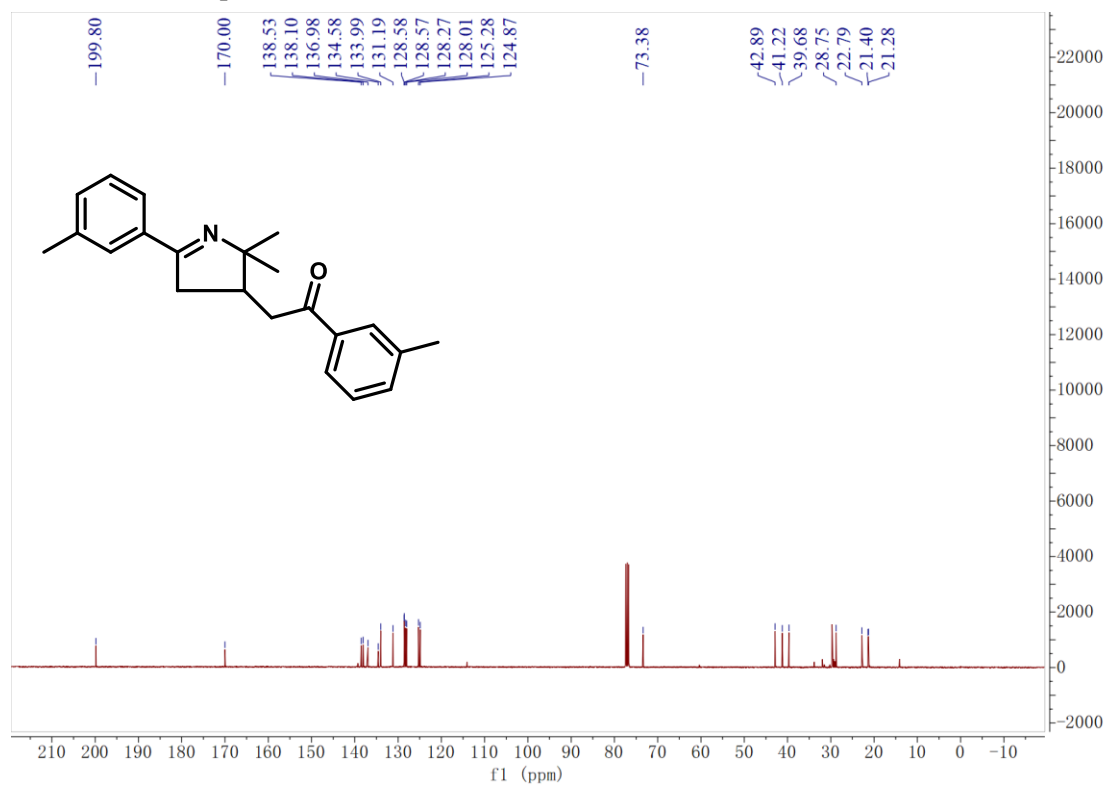

**<sup>1</sup>H NMR of Compound 5i (400 MHz, CDCl<sub>3</sub>)**

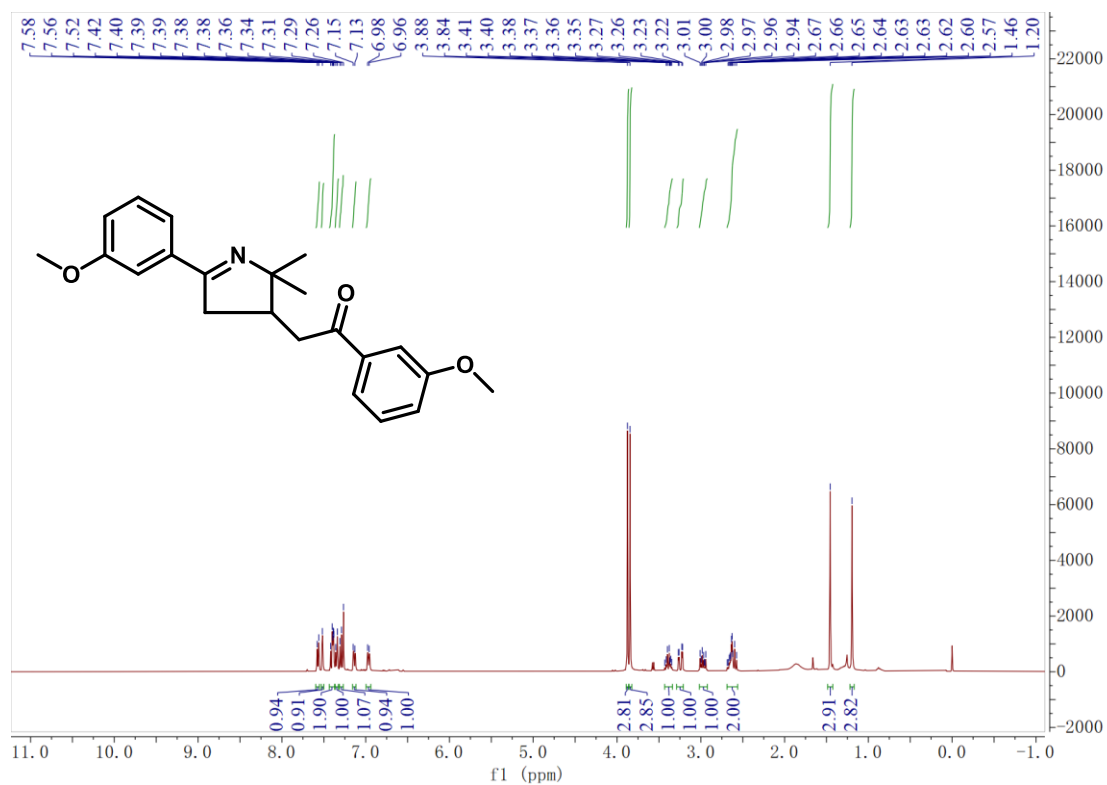

**<sup>13</sup>C NMR of Compound 5i (101 MHz, CDCl<sub>3</sub>)**

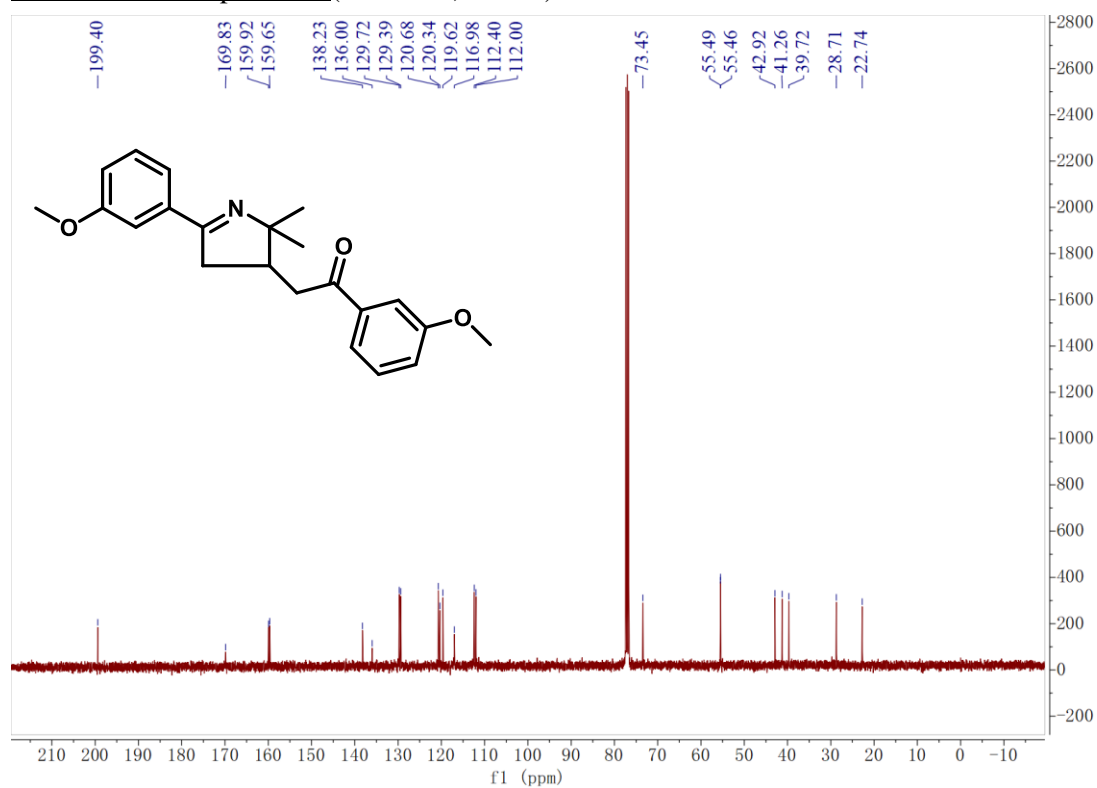

<sup>1</sup>H NMR of Compound **5j** (400 MHz, CDCl<sub>3</sub>)

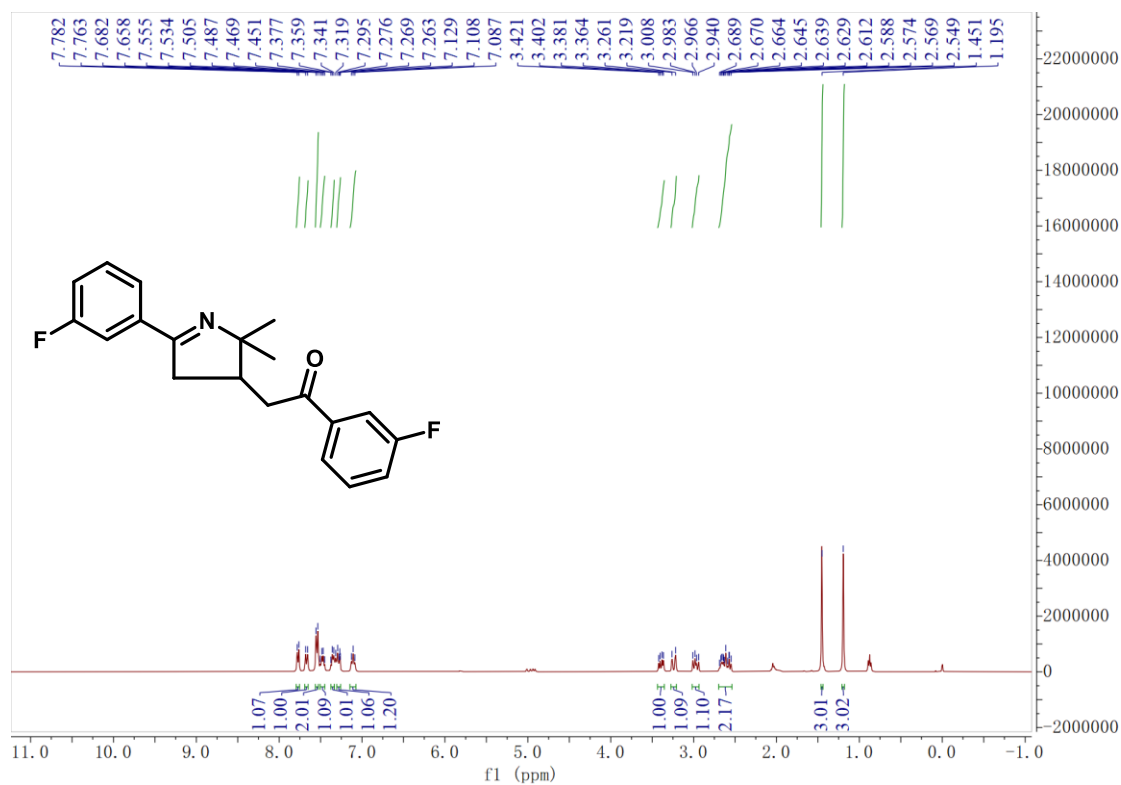

<sup>13</sup>C NMR of Compound **5j** (101 MHz, CDCl<sub>3</sub>)

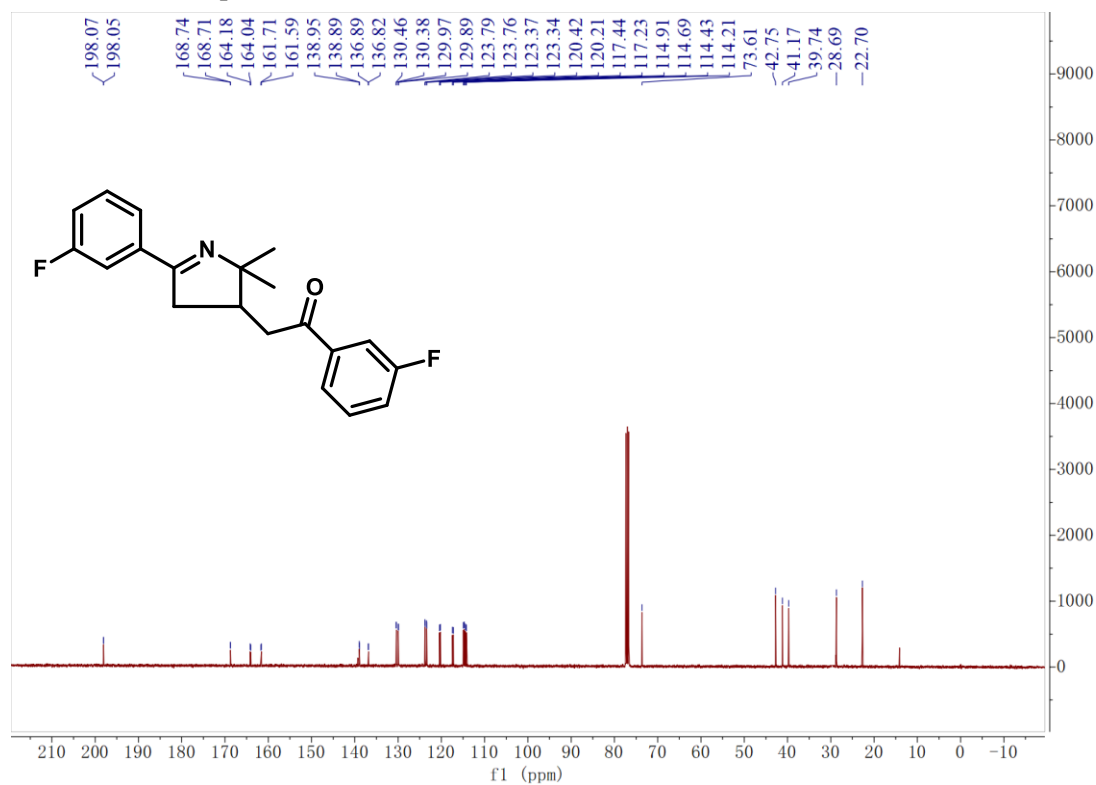



<sup>1</sup>H NMR of Compound **5I** (400 MHz, CDCl<sub>3</sub>)

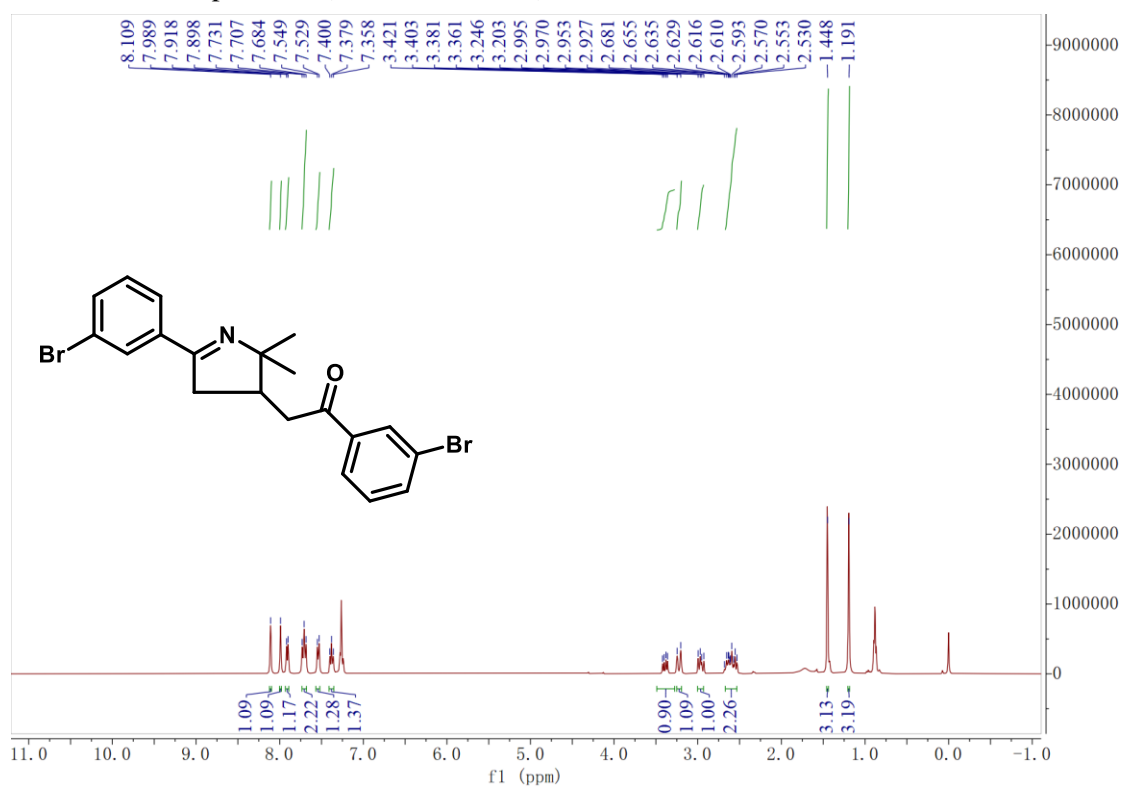

<sup>13</sup>C NMR of Compound **5I** (101 MHz, CDCl<sub>3</sub>)

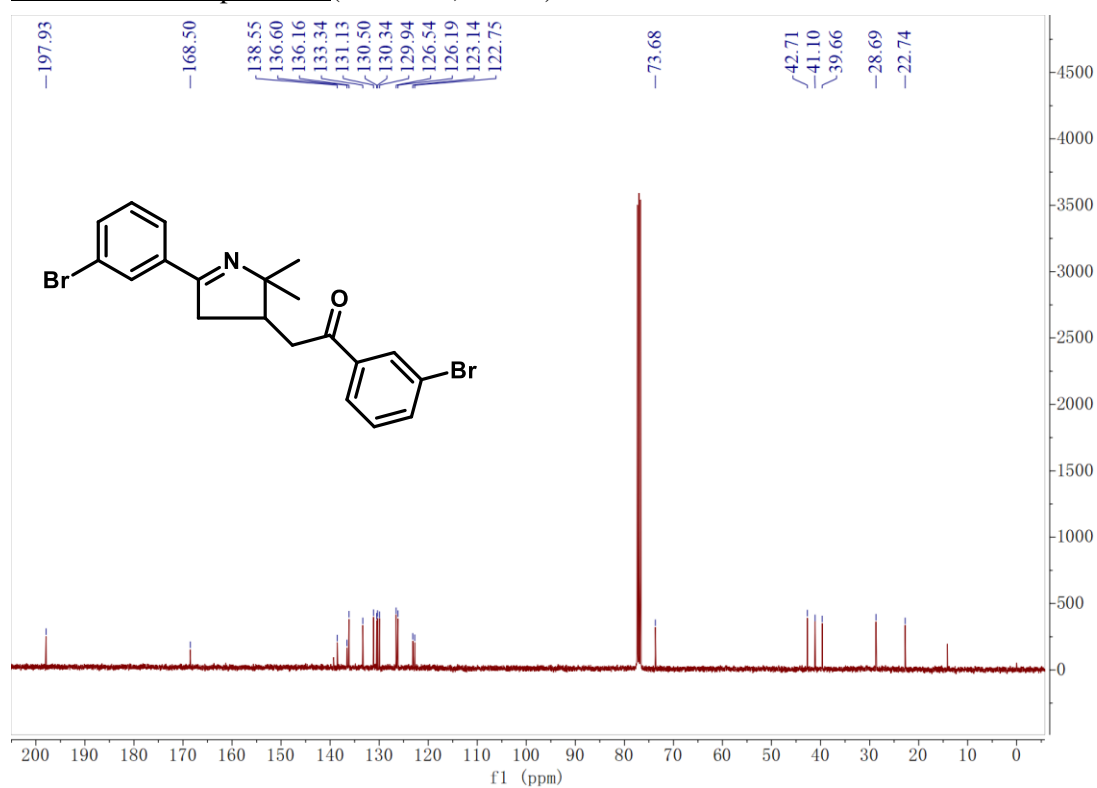

<sup>1</sup>H NMR of Compound **5m** (400 MHz, CDCl<sub>3</sub>)

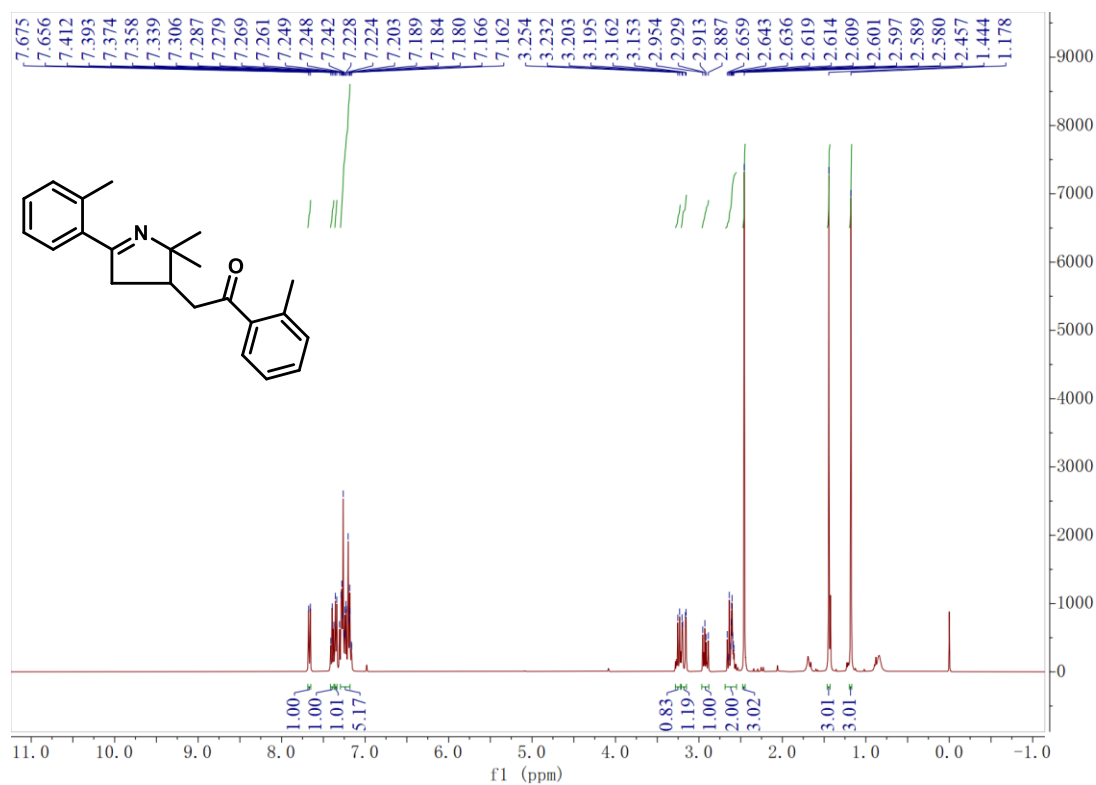

<sup>13</sup>C NMR of Compound **5m** (101 MHz, CDCl<sub>3</sub>)

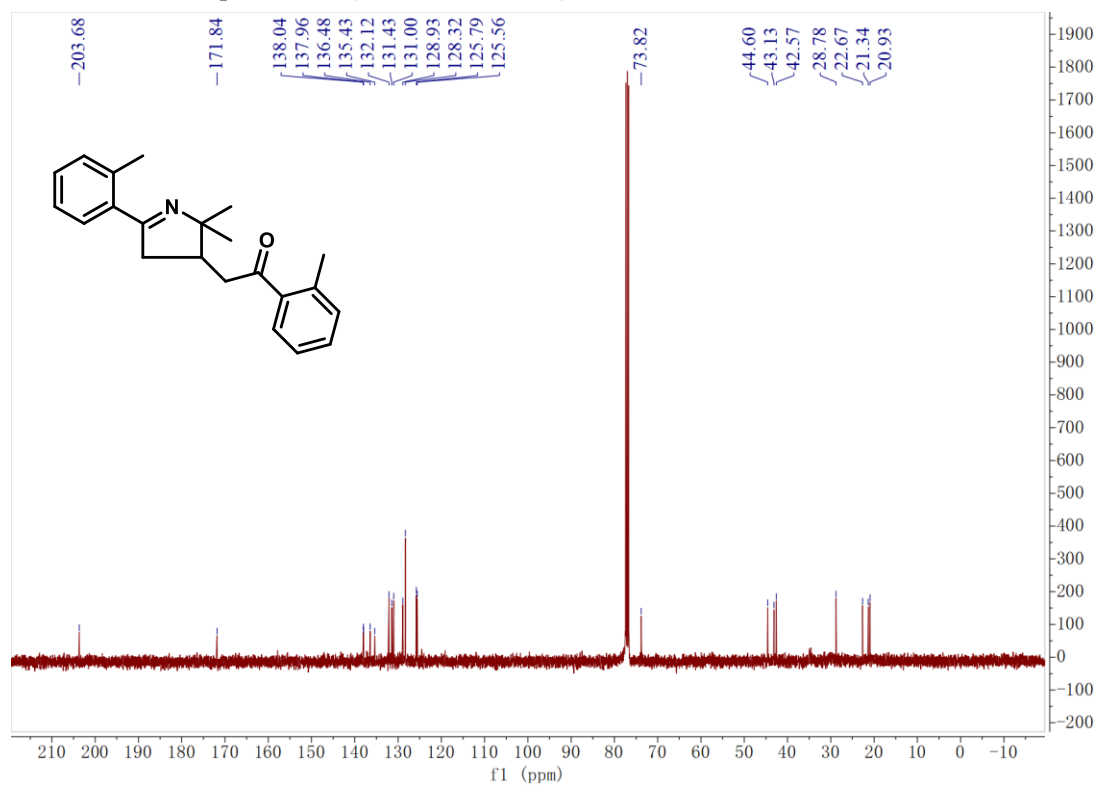

<sup>1</sup>H NMR of Compound **5n** (400 MHz, CDCl<sub>3</sub>)

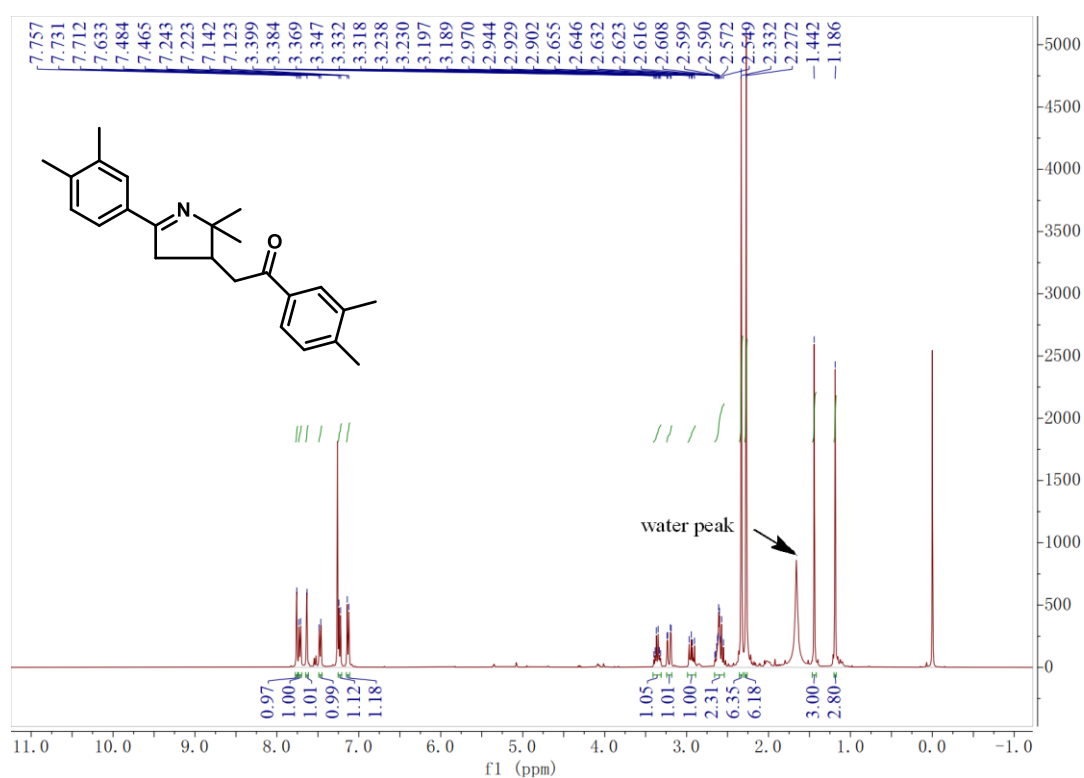

<sup>13</sup>C NMR of Compound **5n** (101 MHz, CDCl<sub>3</sub>)

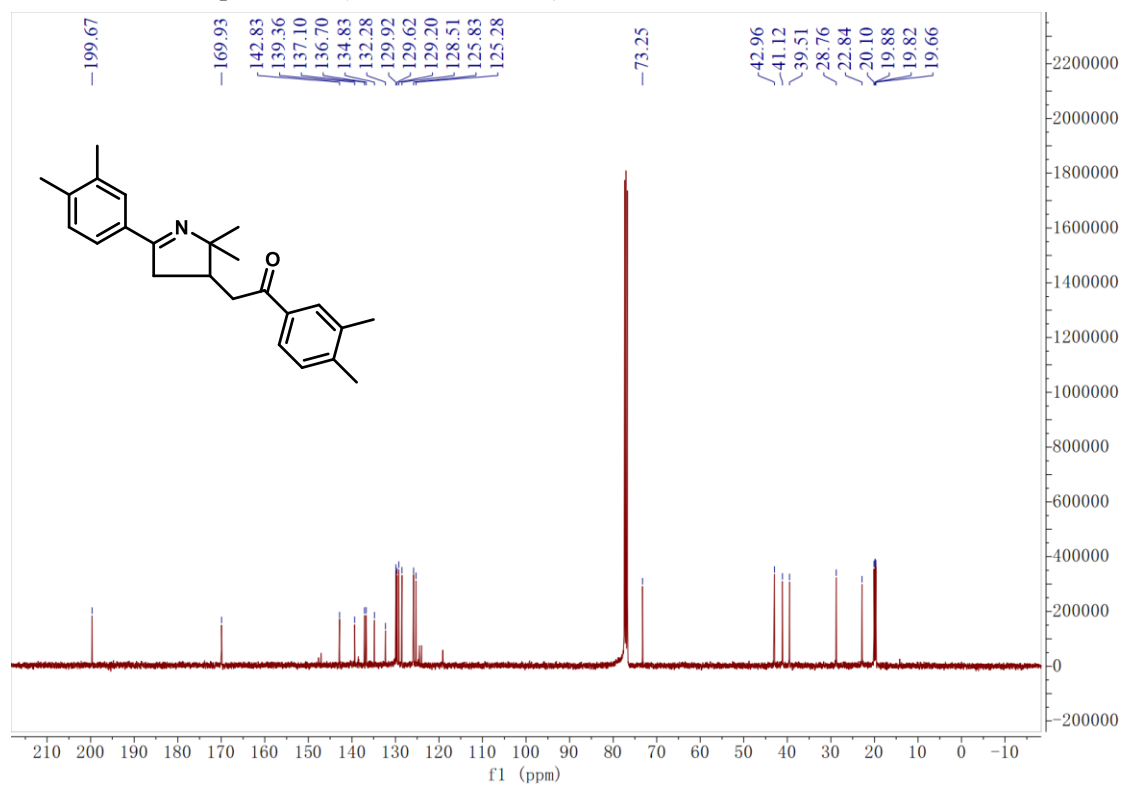



<sup>1</sup>H NMR of Compound **5o** (400 MHz, CDCl<sub>3</sub>)

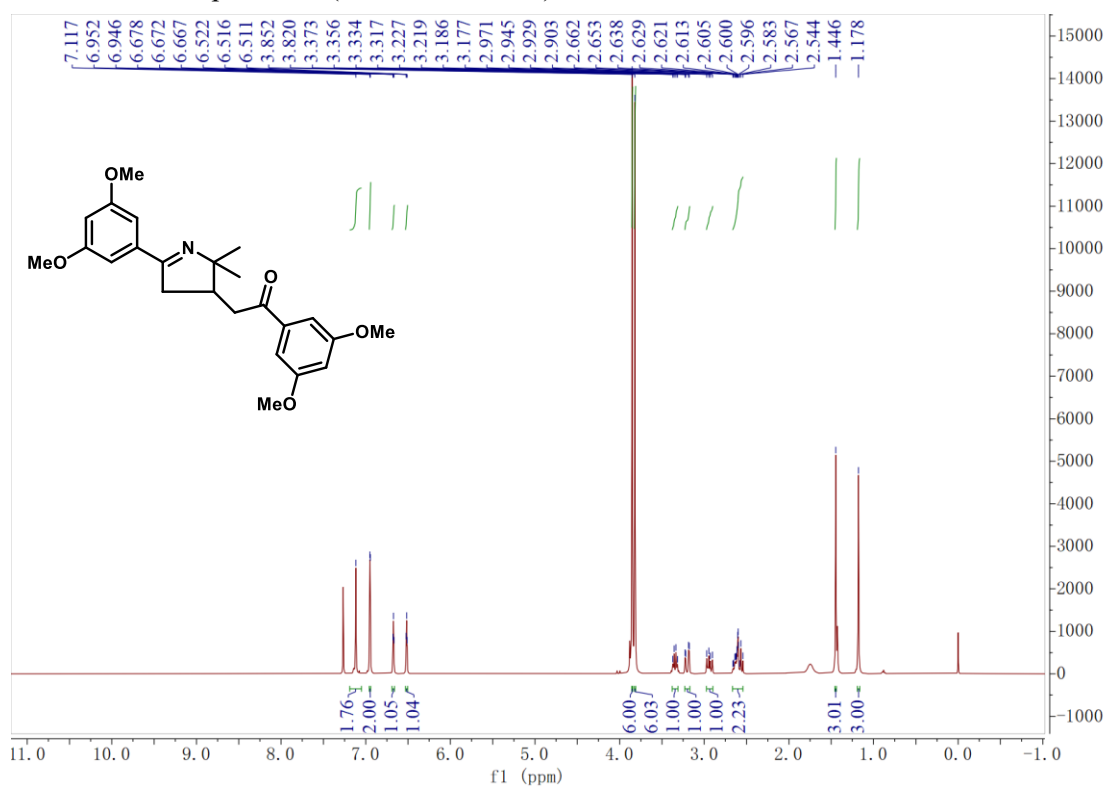

<sup>13</sup>C NMR of Compound **5o** (101 MHz, CDCl<sub>3</sub>)

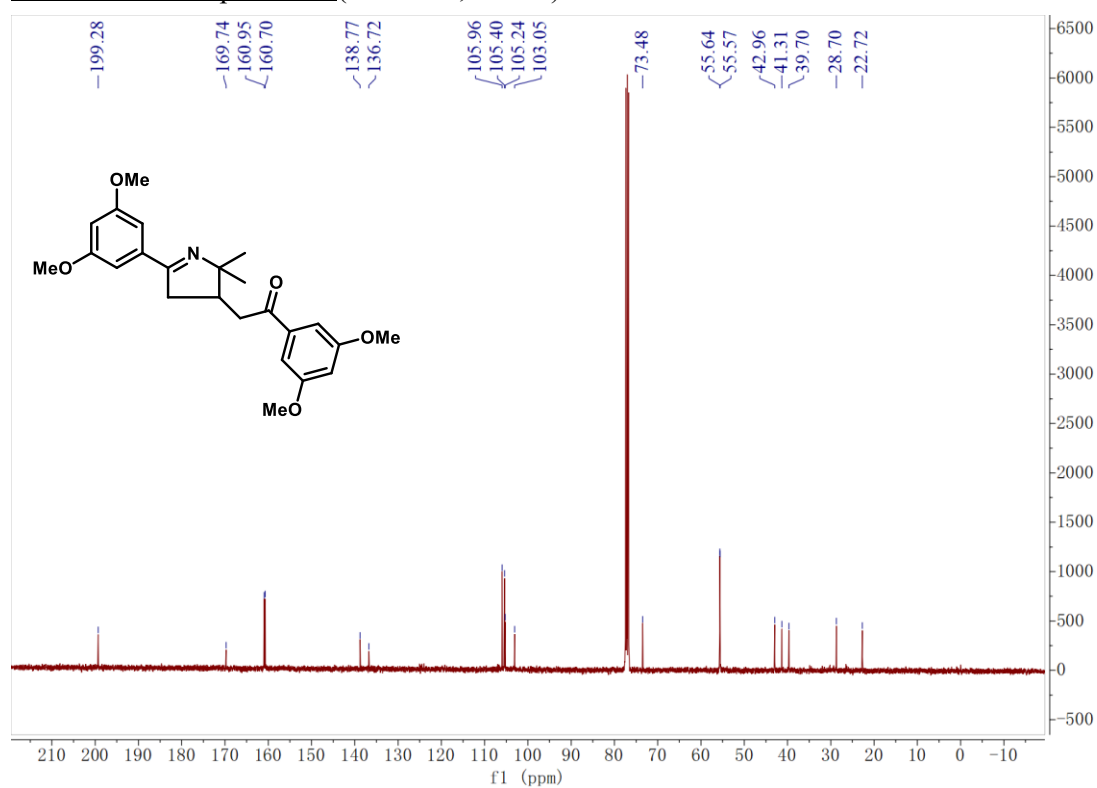

<sup>1</sup>H NMR of Compound **5p** (400 MHz, CDCl<sub>3</sub>)

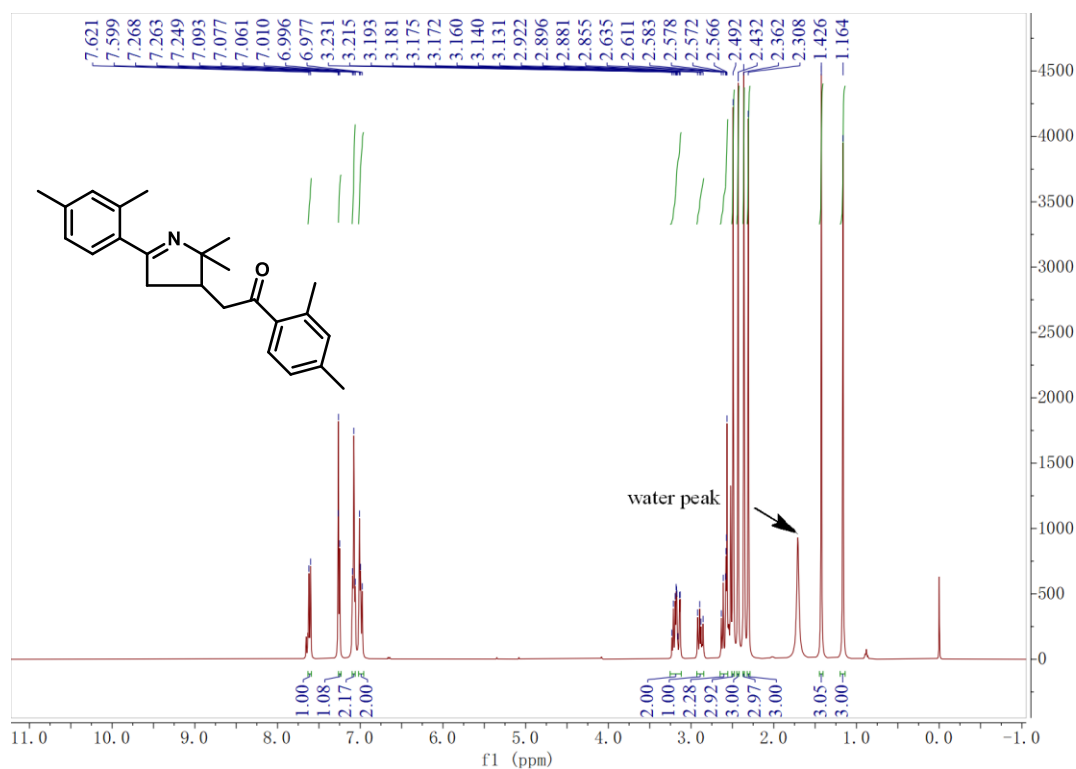

<sup>13</sup>C NMR of Compound **5p** (101 MHz, CDCl<sub>3</sub>)

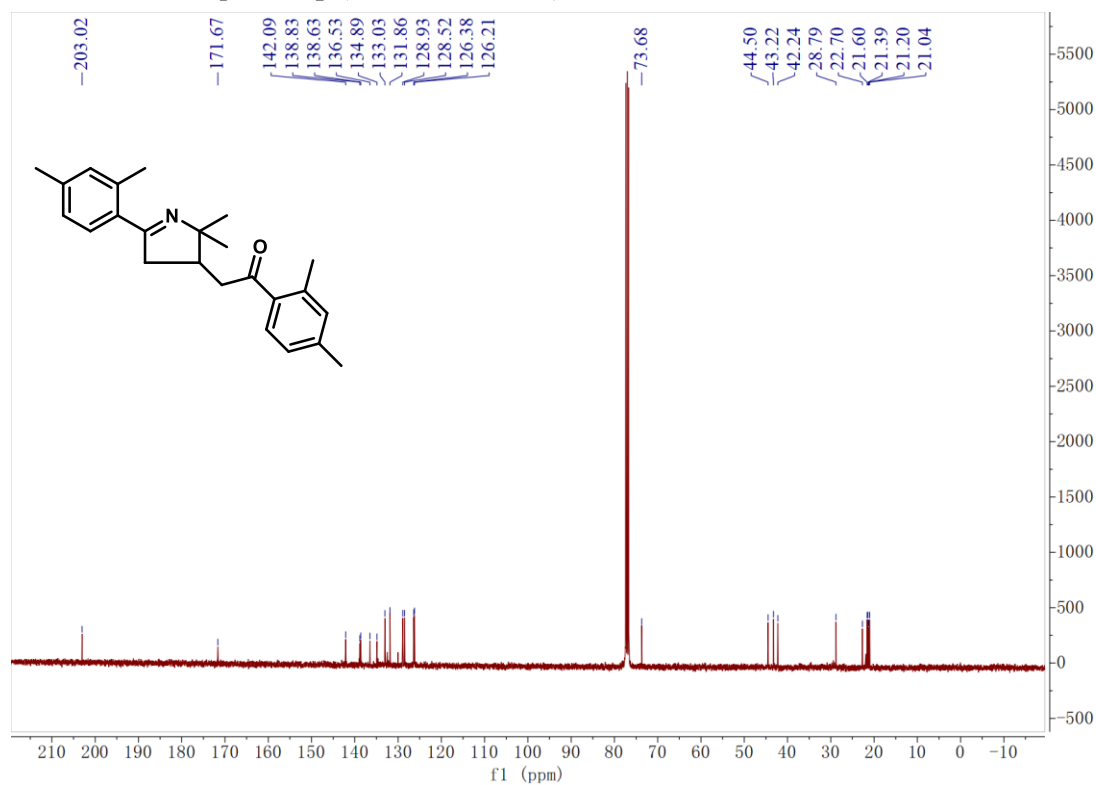

<sup>1</sup>H NMR of Compound **5q** (400 MHz, CDCl<sub>3</sub>)

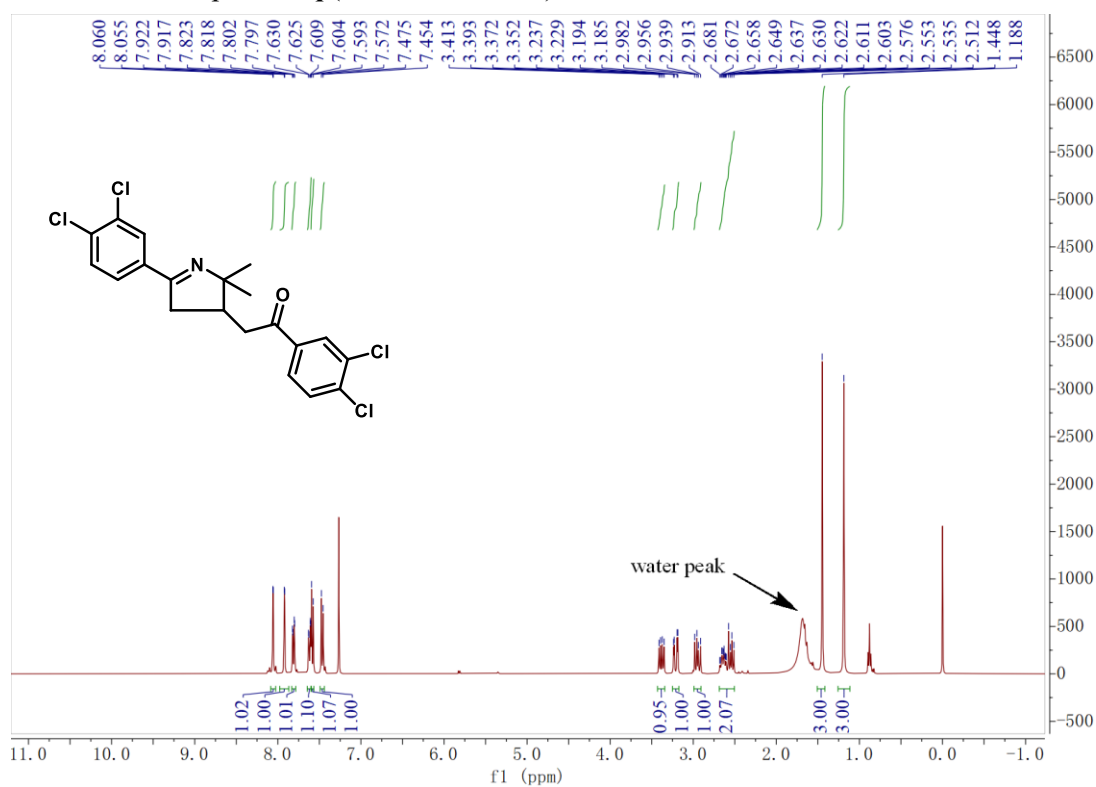

<sup>13</sup>C NMR of Compound **5q** (101 MHz, CDCl<sub>3</sub>)

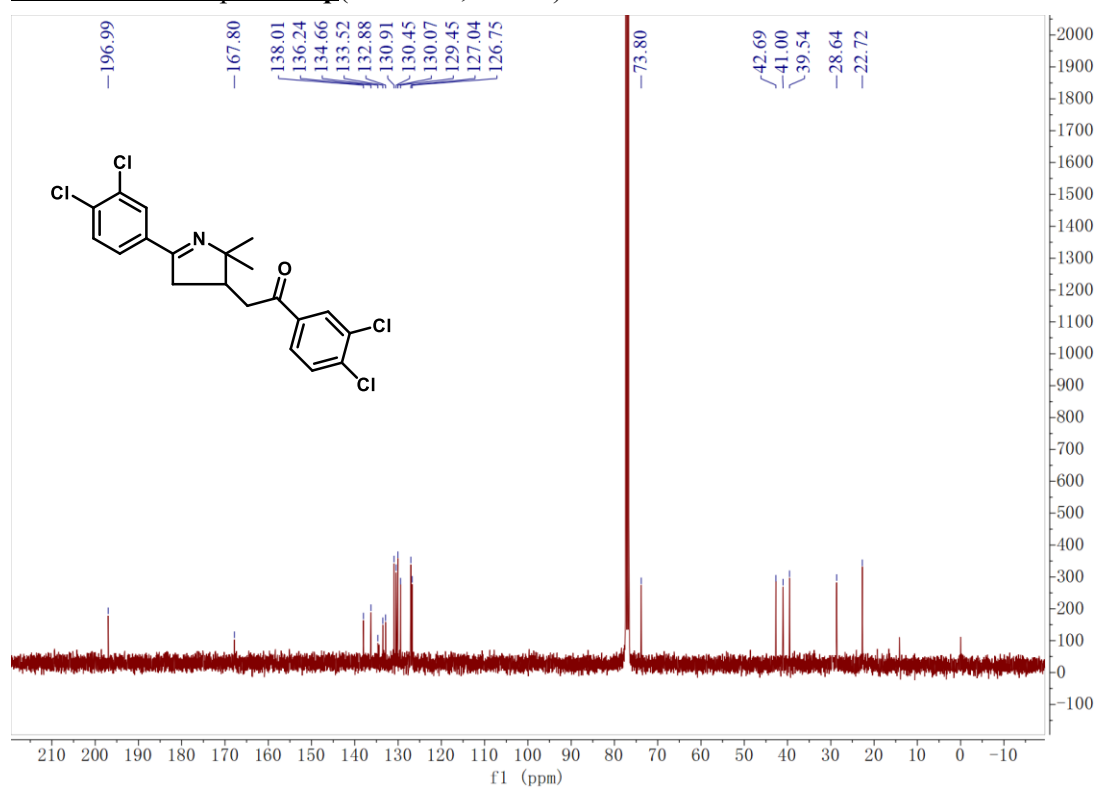

<sup>1</sup>H NMR of Compound **5r** (400 MHz, CDCl<sub>3</sub>)

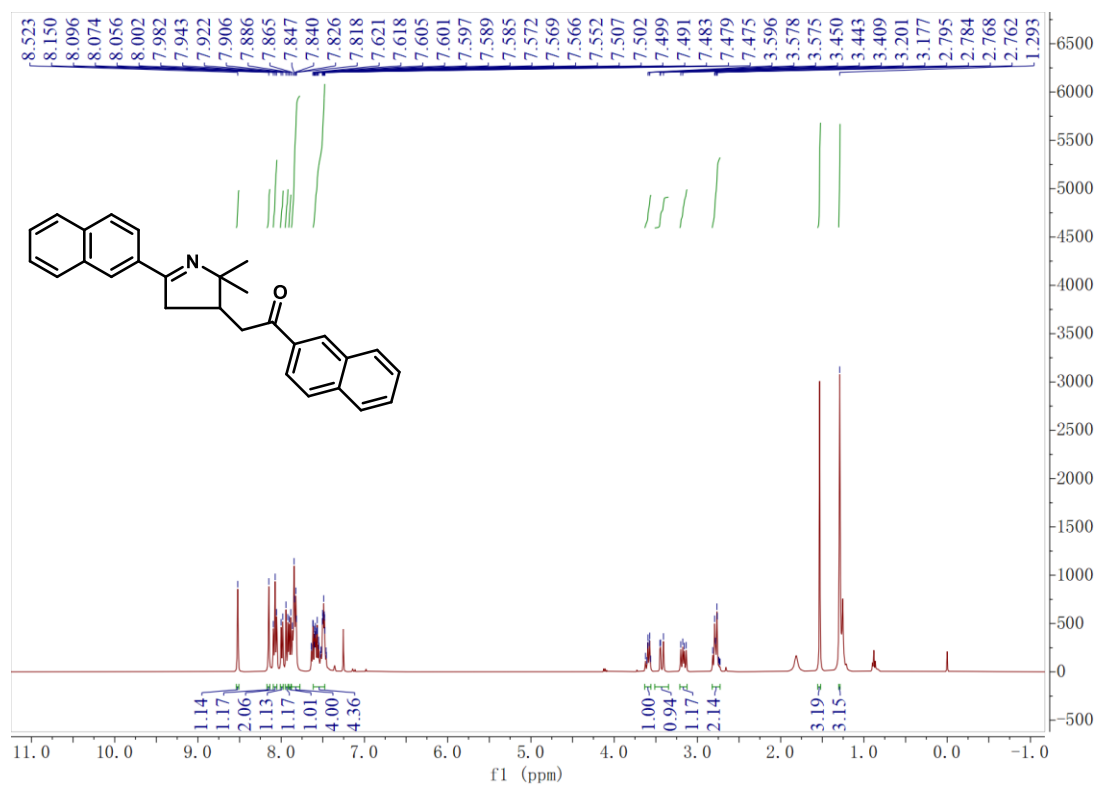

<sup>13</sup>C NMR of Compound **5r** (101 MHz, CDCl<sub>3</sub>)

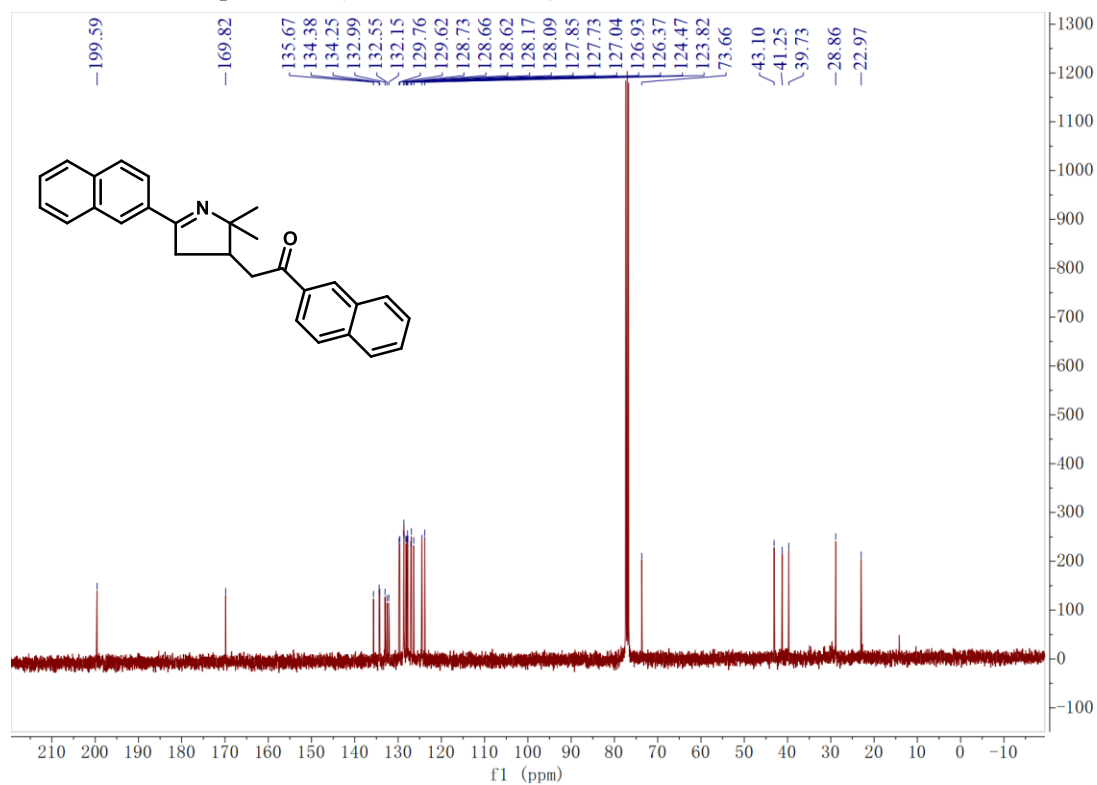

Supplement: d2qo01789j1.pdf [file d2qo01789j1.pdf]
